1  
2  
3  
4  
5  
6  
7  
8  
9  
10  
11  
12  
13  
14  
15  
16  
17  
18  
19  
20  
21  
22

Somatic hypermutation spectra are independent of the local transcriptional and epigenetic landscape

Ursula E. Schoeberl<sup>1\*</sup>, Johanna Fitz<sup>1\*</sup>, Kimon Froussios<sup>1</sup>, Renan Valieris<sup>2</sup>, Marina Makharova<sup>1</sup>, Iordanis Ourailidis<sup>1</sup>, Bernd Bauer<sup>1</sup>, Tobias Neumann<sup>1</sup>, Eva-Maria Wiedemann<sup>1</sup>, Monika Steininger<sup>1</sup>, Adriana Cantoran Garcia<sup>1</sup>, Marialaura Mastrovito<sup>1</sup>, Hugo Mouquet<sup>3</sup>, Israel Tojal Da Silva<sup>2</sup> and Rushad Pavri<sup>1#</sup>

(1) Research Institute of Molecular Pathology (IMP), Campus-Vienna-Biocenter 1, 1030 Vienna, Austria

(2) Laboratory of Bioinformatics and Computational Biology, A. C. Camargo Cancer Center, São Paulo, SP, Brazil

(3) Laboratory of Humoral Immunology, Institut Pasteur, INSERM U1222, Université Paris Cité, 75015 Paris, France

\* equal contribution

# corresponding author ([rushad.pavri@imp.ac.at](mailto:rushad.pavri@imp.ac.at))

23 **Abstract**

24 Somatic hypermutation (SHM) of immunoglobulin variable regions in B cells modulates antibody-antigen  
25 affinity and is indispensable for adaptive immunity. Mutations are introduced by activation-induced  
26 cytidine deaminase (AID) in a co-transcriptional manner resulting in discrete mutation spectra. Current  
27 models propose that activating epigenetic marks, transcriptional pausing and convergent transcription are  
28 necessary for optimal AID recruitment. However, whether these or other transcriptional features can  
29 explain the discrete mutation spectra is unknown. To address this, we compared mutation and nascent  
30 transcription at single nucleotide resolution. Surprisingly, with this precision, SHM spectra do not correlate  
31 with any transcriptional feature at human and mouse variable regions and non-immunoglobulin AID  
32 targets. Moreover, SHM is resistant to up to four-fold reduction of both activating epigenetic marks and  
33 transcription. We propose that, following AID recruitment to its target genes, the DNA sequence flanking  
34 an AID target motif is the key determinant of mutability rather than the local transcriptional and chromatin  
35 landscape.

36

37

38

39

40

41

42

43

44

45

## 46 Introduction

47 Somatic hypermutation (SHM) is the molecular basis for the diversification of antibodies in response to  
48 pathogens and vaccines and is hence indispensable for robust long-term immunity (1-3). SHM occurs in  
49 activated B cells within microanatomical structures called germinal centers in secondary lymphoid tissue  
50 upon engagement with antigens and helper T cells (4). Mutations are generated in the variable regions of  
51 the immunoglobulin (IG) heavy (*IGH*) and light chain (*IGK*, *IGL*) genes by activation-induced cytidine  
52 deaminase (AID) (5, 6) which acts co-transcriptionally on single-stranded DNA (ssDNA) (7-11). AID also  
53 acts at the *IGH* switch regions triggering a reaction cascade leading to class switch recombination (CSR)  
54 which yields the various antibody isotypes essential for effector functions following antigen binding (12-  
55 15). In addition, SHM occurs, albeit with much lower frequency, at several transcribed non-IG genes (16-  
56 20).

57 An important and longstanding question in the field is the relationship of SHM with nascent  
58 transcription and activating epigenetic marks. AID associates with the RNA polymerase II (Pol II)  
59 machinery via interaction with various elongation (21-25) and RNA processing factors (26, 27). However,  
60 since these are generic gene regulatory proteins, such interactions cannot per se explain the specificity of  
61 AID targeting. SHM has also been correlated with the epigenetic landscape especially with activating  
62 histone marks. In particular, depletion of histone modifying enzymes resulted in decreased SHM and/or  
63 CSR accompanied with a decrease in activating histone modifications (24, 28-36). However, the precise  
64 role of these marks in SHM is unknown. Moreover, these marks are typical of any transcribed gene hence  
65 their presence per se cannot confer specificity. Instead, it appears that specificity is conferred by super-  
66 enhancers associated with IG and other AID target loci (37-40). The murine *Igh* super-enhancer is  
67 essential for SHM (41) and is itself a target of AID activity (42). Importantly, an AID-targeted enhancer  
68 when placed in a genomic domain that lacks AID target genes was able to convert these genes into SHM  
69 hotspots, thus providing compelling evidence for the critical role of enhancers in targeting AID (38).

70 The final step of SHM, that is, the actual mutagenesis, is least understood. AID preferentially  
71 deaminates cytidine residues within WRCH motifs (where W = A or T, R = A or G and H = A, C or T) (43-  
72 45). However, not all WRCH residues are targeted and the mutation frequencies of those that are

73 mutated can differ substantially (46-52). Remarkably, even identical WRCH motifs within a given variable  
74 region can differ significantly in mutation frequency (47-52). This differential mutability is a ubiquitous  
75 feature of SHM and implies the existence of as-yet-unknown mechanisms that determine which residue is  
76 mutated and to what extent. More importantly, differential mutability cannot be explained by the  
77 association of AID with Pol II complexes, but rather, suggests that access to ssDNA may be biased  
78 towards certain sequence contexts. In this regard, features of nascent transcription that can cause  
79 transient ssDNA exposure, such as convergent transcription (53), transcriptional pausing (17, 22, 54-57),  
80 initiation (58) and transcription termination (59, 60), have been correlated with SHM and CSR. Moreover,  
81 ssDNA patches are detected in variable regions and suggested to arise via negative supercoiling  
82 upstream of transcribing Pol II, although these patches do not correlate with SHM patterns (56, 57, 60,  
83 61). Indeed, high occupancy of Pol II and SPT5, a Pol II pausing factor implicated in AID targeting (22,  
84 56, 57), was able to identify new AID target genes via a machine learning approach (17). Based on these  
85 observations, a reasonable hypothesis is that differential mutability of WRCH motifs arises because of  
86 local sites of transcription initiation, pausing or convergent transcription which favor AID activity at these  
87 sub-regions within the variable region. Since variable regions are very short (<500 bp), answering this  
88 question requires high-resolution nascent transcriptional maps of variable regions, which are currently  
89 unavailable.

90 In this study, we aimed to address the precise relationship between SHM, nascent transcriptional  
91 features and epigenetic marks using a fresh and direct approach. To do so, we performed precision run-  
92 on sequencing (PRO-seq and PRO-cap) (62) in Ramos human B cells and murine germinal center B cells  
93 to obtain single-nucleotide resolution maps of nascent transcription at multiple human and mouse variable  
94 regions as well as at a large collection of non-IG AID target genes (17). We combined this with high-  
95 resolution mutational profiling to show that patterns of SHM do not consistently correlate with any nascent  
96 transcriptional features. Moreover, via deletion of the *IGH* E $\mu$  enhancer in human B cells, we find that  
97 SHM is insignificantly affected despite up to four-fold reduction in transcription and active chromatin  
98 marks. Importantly, the same variable region sequence, studied in mouse or human regulatory contexts,  
99 exhibits a nearly identical SHM pattern. The results strongly suggest that following AID recruitment to the

100 variable gene locale, the SHM spectrum is determined by the DNA sequence flanking the hotspot  
101 residues rather than any co-transcriptional or epigenetic feature.

102

## 103 **Results**

### 104 **The human and mouse *IGH* variable region locale harbors relatively low levels of histone** 105 **acetylation and H3K4 trimethylation**

106 As a model system of SHM, we chose the Ramos human B cells. Ramos is an IgM-positive Burkitt  
107 lymphoma-derived cell line where the single functional, pre-recombined *IGH* variable region consists of  
108 the variable gene, VH4-34, the diversity segment, DH3-10, and the joining segment, JH6. Ramos cells  
109 constitutively express AID and undergo very low levels of SHM mostly at C:G residues (63).

110 To determine the chromatin landscape of the Ramos *IGH* locus, we performed chromatin  
111 immunoprecipitation followed by quantitative PCR (ChIP-qPCR) for histone modifications associated with  
112 active promoters and enhancers (histone H3 acetylated on lysine 27, H3K27ac or trimethylated on lysine  
113 3, H3K4me3) and transcription elongation in gene bodies (H3 trimethylated on lysine 36, H3K36me3). At  
114 active genes, H3K27ac and H3K4me3 are enriched at nucleosomes flanking the transcription start site.  
115 Surprisingly, we observed that the variable region is characterized by relatively low levels of all marks  
116 that, importantly, was not due to decreased nucleosome occupancy as judged by the levels of histone H3  
117 (Fig. S1A). As a result, the first nucleosome from the transcription start site has the lowest levels of  
118 H3K27ac and H3K4me3 which is contrary to what is normally observed at highly active genes where the  
119 first nucleosome harbors the highest levels of these marks. In contrast, much higher levels of all marks  
120 were observed in the intronic regions flanking the E $\mu$  enhancer with an expected decrease at E $\mu$  itself  
121 where nucleosomes are occluded by the presence of transcription factors (Fig. S1A) (64). Importantly, the  
122 same profiles were observed at the murine *Igh* in activated, primary B cells expressing the B1-8<sup>hi</sup> variable  
123 region (65) (Fig. S1B). We conclude that variable regions are marked by relatively low levels of activating  
124 histone marks and that this landscape is conserved between the human Ramos and mouse B1-8<sup>hi</sup>  
125 variable regions.

126 **The E $\mu$  enhancer regulates the levels of chromatin marks in the flanking intronic DNA but not**  
127 **within the variable region**

128 The fact that the highest enrichments of chromatin marks were seen on either side of the E $\mu$  enhancer  
129 suggested that this element may be responsible for the deposition of these marks. This raised the  
130 question of whether the loss of E $\mu$  would alter the levels of these marks and affect SHM. To minimize  
131 effects of ongoing SHM on the variable gene sequence, we first ablated AID in Ramos cells (AID<sup>-/-</sup>) and  
132 subsequently deleted E $\mu$  in AID<sup>-/-</sup> cells (AID<sup>-/-</sup> E $\mu$ <sup>-/-</sup>) (Fig. S1C). Specifically, by CRISPR-mediated  
133 editing, we deleted a 583 bp region corresponding to the peak of chromatin accessibility measured by  
134 assay for transposase-accessible chromatin (ATAC-seq) signal at E $\mu$  in AID<sup>-/-</sup> Ramos cells (AID<sup>-/-</sup> E $\mu$ <sup>-/-</sup>)  
135 (Fig. S1C). Based on PRO-cap analysis of transcription start sites (see below), this deletion eliminates the  
136 I $\mu$  promoter that encodes the sterile germline *IGHM* transcript and antisense transcription start sites  
137 residing in E $\mu$  (Fig. S1C). We chose two independent clones, AID<sup>-/-</sup> E $\mu$ <sup>-/-</sup> c1 and AID<sup>-/-</sup> E $\mu$ <sup>-/-</sup> c2, for  
138 subsequent experiments (Fig. S1D).

139 To comprehensively visualize profiles of these histone marks across the variable region and  
140 flanking sequences, we performed ChIP followed by deep sequencing (ChIP-seq) for H3K27ac,  
141 H3K4me3 and H3K36me3. We generated a custom chromosome spanning the Ramos variable region  
142 and promoter. Importantly, the Ramos variable region is highly mappable and hence there is minimal loss  
143 of reads due to multimapping with other variable gene families (see later section). The results in AID<sup>-/-</sup>  
144 Ramos cells were consistent with ChIP-qPCR in that the levels of all marks were lowest in the promoter-  
145 proximal region and gradually increased into the variable region, peaking in the intronic sequences  
146 flanking E $\mu$  (Fig. 1A-B). This analysis also revealed the absence of bimodal distributions of H3K27ac and  
147 H3K4me3 at the VH4-34 promoter, which is commonly observed at highly active divergently transcribed  
148 genes. In AID<sup>-/-</sup> E $\mu$ <sup>-/-</sup> cells, all three marks were decreased (Fig. 1A-B), a finding that we confirmed by  
149 ChIP-qPCR and which was not due to changes in nucleosome occupancy as determined by histone H3  
150 measurements (Fig. 1C). Using antibodies against pan-H3 and pan-H4 acetylation, we observed a  
151 significant decrease in histone acetylation across the locus in AID<sup>-/-</sup> E $\mu$ <sup>-/-</sup> cells (Fig. 1C). Moreover,

152 another mark of transcription elongation, H3K79me3, was also reduced in AID<sup>-/-</sup> E $\mu$ <sup>-/-</sup> cells (Fig. 1C). All  
153 marks in AID<sup>-/-</sup> E $\mu$ <sup>-/-</sup> cells were significantly reduced up to 4-fold in the intron where they are normally at  
154 their peak levels (Fig. 1A-C). However, within the variable region, where these marks are normally at their  
155 lowest levels, there was no significant change in AID<sup>-/-</sup> E $\mu$ <sup>-/-</sup> cells (Fig. 1A-C). Consequently,  
156 AID<sup>-/-</sup> E $\mu$ <sup>-/-</sup> cells harbor a chromatin landscape wherein the levels of all marks appear to be comparable  
157 between the variable region and the intron (Fig. 1C, compare the measurements from amplicons 2, 3 and  
158 5 in AID<sup>-/-</sup> and AID<sup>-/-</sup> E $\mu$ <sup>-/-</sup> cells). We conclude that E $\mu$  is responsible for the higher levels of chromatin  
159 marks within the intron but has no significant influence on the deposition of these marks within the  
160 variable region.

161 These changes in the chromatin landscape in AID<sup>-/-</sup> E $\mu$ <sup>-/-</sup> cells were accompanied by a 2-4-fold  
162 decrease of nascent transcription in the variable region and intron, as well as a 2-fold decrease of the  
163 spliced IgM mRNA (Fig. 2A-B). The decrease in transcription within the variable region and intron implies  
164 that E $\mu$  regulates optimal transcription initiation from the variable gene promoter. Nevertheless, despite  
165 these decreases in transcription, surface IgM levels were unaffected in E $\mu$ <sup>-/-</sup> cells suggesting a lack of  
166 absolute correlation between IgM mRNA and protein levels (Fig. S1E). We conclude that E $\mu$  positively  
167 and significantly regulates nascent transcription in the variable region but has no significant impact on its  
168 epigenetic landscape.

169 **SHM frequency does not correlate with the levels of nascent transcription or activating histone**  
170 **marks in the variable region locale**

171 AID<sup>-/-</sup> E $\mu$ <sup>-/-</sup> cells provide an ideal system to ask whether changes in the levels of nascent transcription and  
172 chromatin marks directly impact on SHM without any contribution from secondary, indirect effects. Hence,  
173 we sequenced the variable region as well as the JH6 intron immediately downstream (Fig. 2C, upper  
174 panel). This analysis allowed us to compare SHM between a region where chromatin marks were  
175 normally low and E $\mu$ -independent (variable region) and a region where the marks were normally high and  
176 strongly E $\mu$ -dependent (JH6 intron). To measure SHM, we infected AID<sup>-/-</sup> and AID<sup>-/-</sup> E $\mu$ <sup>-/-</sup> cells with  
177 JP8Bdel, a C-terminal truncation mutant of AID that results in nuclear retention and major increase in

178 mutation rates (66). As a control, we also infected cells with a catalytically inactive AID mutant (E58Q)  
179 (66). In both the variable region and JH6 intron, we observed a small (~20%) decrease in SHM frequency  
180 in AID<sup>-/-</sup> E $\mu$ <sup>-/-</sup> relative to AID<sup>-/-</sup> JP8Bdel-expressing cells that was not statistically significant (Fig. 2C). This  
181 result is consistent with mouse studies where loss of E $\mu$  caused only modest decreases in SHM (67, 68).  
182 As an alternative readout of SHM activity, we assayed for the loss of surface IgM, which occurs due to  
183 AID-induced stop codons or frameshifts (63). The results showed that the magnitude of IgM loss was  
184 similar between the control and E $\mu$ <sup>-/-</sup> cells suggesting that the minor decreases in SHM do not translate  
185 into equivalent changes in IgM loss (Fig. 2D-E). We conclude that the E $\mu$  enhancer is dispensable for  
186 robust SHM in Ramos cells.

187 By comparing the levels of chromatin marks with SHM frequencies in the variable region and JH6  
188 intron, we can draw three major conclusions: First, we infer that the levels of SHM do not correlate with  
189 those of activating histone marks. Indeed, SHM frequency is slightly lower in the intron ( $1.6 \times 10^{-3}$ ), which  
190 harbors the highest level of these marks, than in the variable region ( $1.86 \times 10^{-3}$ ), which has the lowest  
191 levels of these modifications (Fig. 2C). Second, as exemplified by the JH6 intron, SHM is resistant to  
192 major decreases in these marks. Third, we attribute the small reduction in SHM in AID<sup>-/-</sup> E $\mu$ <sup>-/-</sup> cells to the  
193 decrease in nascent transcription although, here too, the decrease of SHM (~20%; Fig. 2C) is  
194 considerably smaller than that of transcription which shows up to 70% loss in the JH6 intron of  
195 AID<sup>-/-</sup> E $\mu$ <sup>-/-</sup> cells (Fig. 2A, amplicons 2-5). We conclude that although our results do not rule out a role for  
196 these activating marks in SHM, they do clearly demonstrate that their presence, profiles and even their  
197 significant reduction is not a predictor of SHM.

### 198 **High-resolution transcriptomic profiling of different human variable regions reveals the absence** 199 **of direct relationships between nascent transcriptional features and SHM spectra**

200 A major, unsolved problem in SHM biology is the differential mutability of WRCH motifs within variable  
201 regions which implies the existence of local, sequence-intrinsic mechanisms regulating AID activity post-  
202 recruitment (46-48, 50-52). We asked whether SHM spectra are dictated by local features of nascent



203 transcription landscape that could transiently lead to increased ssDNA exposure, such as during  
204 transcription initiation, pausing and/or convergent/antisense transcription.

205         Since V genes occur as families with varying degrees of sequence identity, mapping of next-  
206 generation sequencing (NGS) reads to recombined variable regions can be problematic because  
207 standard alignment workflows eliminate reads that map to more than one location in the genome  
208 (multimappers) and only align reads mapping uniquely (typically allowing 2-3 mismatches). In Ramos  
209 cells, visual inspection of PRO-seq tracks on the UCSC genome browser revealed robust coverage within  
210 the VH4-34 gene with uniquely-mapping reads indicating that this V gene is highly mappable (not shown).  
211 Moreover, there were no unique reads mapping to other V gene families suggesting that they are  
212 transcriptionally silent in these cells. To address this more systematically, we retrieved the normally  
213 discarded, multimapping reads and allowed them to re-align to the recombined Ramos variable region  
214 with the important proviso that they only multimap to annotated V, D or J segments and not elsewhere in  
215 the genome (Fig. 3A). Separate tracks were created for uniquely mapping reads and the recalled  
216 multimapping reads, which were then combined to obtain the total profile (Fig. 3B).

217         We measured nascent transcriptional activity with PRO-seq, which maps the location and  
218 orientation of actively engaged RNA polymerase II (Pol II) at single-nucleotide resolution, and the related  
219 method, PRO-cap, which maps transcription initiation sites of capped, nascent RNAs (62). Given that  
220 variable regions are short (<500 bp), the single-nucleotide resolution of PRO-seq is ideally suited to  
221 identify potential sites of pausing, as well as antisense and convergent transcription within variable  
222 regions. For simplicity, we use the term “pausing” to refer to accumulation of PRO-seq signal in variable  
223 regions although it must be noted this refers to the slower-moving, elongating Pol II molecules and is not  
224 equivalent to promoter-proximal pausing which is also reported by PRO-seq. Most notably, promoter-  
225 proximal pausing occurs via the binding of NELF which inhibits elongation whereas elongating Pol II lacks  
226 NELF and contains additional proteins such as SPT6 and the PAF complex (69-72). Accumulation of Pol  
227 II signal in gene bodies may arise due to the slowing down of Pol II as a result of steric barriers such as  
228 secondary structures or premature termination signals. However, initiation events within gene bodies

229 could give rise to a paused Pol II state akin to promoter-proximal pausing and can be identified if PRO-  
230 seq accumulation is associated with upstream PRO-cap enrichments.

231 Our mapping pipeline revealed that the Ramos variable region is predominantly covered by  
232 uniquely-mapping reads with very few multimapping reads (Fig. 3B). Of note, the same pipeline was used  
233 for the ChIP-seq analysis of Ramos cells described in Fig. 1 above. Therefore, this approach allowed us,  
234 for the first time, to delineate the transcriptional and epigenetic landscapes of IG variable regions. In  
235 contrast to the lack of a bimodal peak of activating histone marks (Fig. 1A), the Ramos VH4-34 promoter  
236 showed clear bidirectional transcription and promoter-proximal pausing, the latter being noticeable as the  
237 PRO-seq enrichments shortly downstream of the promoter-associated PRO-cap initiation signals (Fig.  
238 3C). Increased PRO-seq read density was observed towards the 3' end of the variable region suggestive  
239 of slowly-elongating or paused Pol II. However, the rest of the variable region harbored relatively low  
240 PRO-seq signals (Fig. 3B and magnified view in Fig. 3C). Next, we infected cells with AID(JP8Bdel) and  
241 analyzed SHM patterns in the variable region using an optimized version of mutation analysis with paired-  
242 end deep sequencing (MutPE-seq) of a PCR-amplified fragment corresponding to the variable region (73)  
243 (Fig. 3E). Mutations occurred robustly at C:G residues within WRCH motifs with weak targeting of A:T  
244 residues, as expected from Ramos cells. Moreover, the cold spot motif, SYC (where S = C or G and Y =  
245 C or T) was poorly mutated (Fig. 3F-H). However, there was no discernible overlap of the mutation profile  
246 with that of nascent transcription. In particular, the region of highest PRO-seq read density at the 3' end of  
247 the variable region is not preferentially mutated over upstream C:G motifs where PRO-seq signal is much  
248 weaker (Fig. 3D-E). Indeed, the most mutated residue is located near the 5' end of the variable region  
249 where nascent transcription signals are lower (Fig. 3D). We conclude that there appears to be no  
250 discernible feature of the nascent transcriptional landscape that can account for the observed frequency  
251 or distribution of mutations.

252 PRO-seq in AID<sup>-/-</sup> E $\mu$ <sup>-/-</sup> cells revealed that nascent sense transcription was uniformly decreased  
253 across the variable region and intron (Fig. S1F-G), consistent with the RT-qPCR results from these cells  
254 (Fig. 2A). Of note, PRO-seq showed that the E $\mu$  enhancer harbors the start sites of an antisense  
255 transcript, substantially weaker than the sense transcript (note the Y axis scale). This transcript initiates at

256 the 5' boundary of E $\mu$  and terminates within the variable region, resulting in convergent transcription  
257 within the variable region (Fig. 3C-D). Moreover, the decrease in antisense transcription in AID<sup>-/-</sup> E $\mu$ <sup>-/-</sup>  
258 cells is stronger than sense transcription resulting in a major decrease in convergent transcription in the  
259 variable region and intron (Fig. S1F-G). Given the weak SHM phenotype in AID<sup>-/-</sup> E $\mu$ <sup>-/-</sup> cells (Fig. 2C), we  
260 conclude that SHM is resistant to major decreases in Pol II levels within the variable region and intron, in  
261 both sense and antisense orientations.

262 To determine the transcriptomic profiles of other human variable regions, we developed a  
263 strategy to replace the endogenous *IGH* variable region of Ramos cells with any variable region of choice  
264 using CRISPR editing (Fig. S2A-B and Methods). We chose two variable regions corresponding to the  
265 unmutated precursors of broadly neutralizing antibodies identified in individuals infected with human  
266 immunodeficiency virus 1 (HIV1). One variable region consisted of VH4-59\*01, DH2-02 and JH6\*03  
267 (termed VH4-59) (74) and the other of VH3-30\*18, DH2-02 and JH6\*02 (75). In both cases, the  
268 sequences upstream and downstream of the new variable regions, including the VH4-34 promoter, leader  
269 peptide and intron are identical to the endogenous Ramos *IGH* sequence. Our alignment pipeline  
270 revealed that sub-regions of both VH3-30 and VH4-59 harbored multimapping reads with the most  
271 prominent being the framework region 3 preceding CDR3 in VH4-59 which was entirely covered with  
272 multimapping reads (Fig. S2C-D).

273 We analyzed the transcriptional and mutational landscape of these two variable regions using  
274 PRO-seq, PRO-cap and MutPE-seq, the latter following infection with AID(JP8Bdel) (Fig. 4). At VH4-59,  
275 we observed an increase in PRO-seq enrichment near the end of the variable region (Fig. 4A and  
276 magnified in Fig. 4B), reminiscent of Pol II pausing and akin to that seen at the endogenous Ramos  
277 variable region (Fig. 3B-C). These enrichments were considerably weaker at the VH3-30 variable region  
278 (Fig. 4D-E). The most plausible explanation may lie in the fact that VH4-59 and VH4-34 belong to the  
279 same variable gene family (VH4) and hence share higher sequence identity than VH3-30 which is  
280 phylogenetically more distant from the VH4 family (76). This also suggests that sequence-intrinsic  
281 features may be responsible for the observed differences in nascent transcription profiles. Most  
282 importantly, and in agreement with the results from the endogenous Ramos variable region, the highest

283 mutation frequencies in either VH4-59 (Fig. 4B) or VH3-30 (Fig. 4E) were often not associated with  
284 regions of increased PRO-seq signal.

285 Of note, when comparing the mutation patterns between all three variable regions analyzed here,  
286 the strong bias for C:G mutations typical of Ramos cells is seen in all cases (Fig. 3E and Fig. 4D, F).  
287 Moreover, there appears to be some bias of mutation load in the CDRs although several major mutation  
288 hotspots are also located within the intervening framework regions (Fig. 3E and Fig. 4D, F). The coldspot  
289 SYC motifs are weakly targeted or untargeted by AID, as expected (Fig. 3E and Fig. 4D, F). Finally, the  
290 differential mutability of WRCH motifs by AID, ranging from highly mutated to unmutated, is seen in all the  
291 analyzed variable regions (Fig. 3E and Fig. 4D, F) and is in line with observations in previous studies (47,  
292 48).

293 Taken together, we conclude that although pausing, antisense transcription and convergent  
294 transcription are all observed to varying degrees in different variable regions, none of these features, or  
295 any combination thereof, correlates with the spectra of SHM.

### 296 **SHM in germinal center B cells at a murine variable region shows no direct relationship with** 297 **nascent transcriptional features**

298 In mice, SHM occurs robustly *in vivo* in germinal center B cells (GCBs) but is inefficient *in vitro* in  
299 activated primary B cells (48). Thus, we asked if such differences could be related to differences in the  
300 underlying transcriptional landscape. To address this, we made use of the B1-8<sup>hi</sup> *Igh* knock-in mouse  
301 where the murine B1-8<sup>hi</sup> variable region is knocked-in at the endogenous *Igh* locus (77). In this system,  
302 one can compare SHM and transcriptional features of the B1-8<sup>hi</sup> variable region from both germinal center  
303 B cells (GCBs) as well as primary *in vitro* activated B cells. To boost SHM in primary cells, we generated  
304 homozygous B1-8<sup>hi</sup> *Rosa26*<sup>AIDER</sup> mice where AID fused to the estrogen receptor (AIDER) is expressed  
305 constitutively from the *Rosa26* promoter (*Rosa26*<sup>AIDER</sup>) such that upon addition of 4-hydroxytamoxifen,  
306 AIDER is translocated into the nucleus (73).

307 PRO-seq analysis from homozygous B1-8<sup>hi</sup> mice showed that the Vh1-72 gene used in the B1-8<sup>hi</sup>  
308 recombined variable region shares strong homology with other V genes in the murine *Igh* locus resulting

309 in a very high degree of multimapping (Fig. S2E). Importantly, the CDR3 region was covered with  
310 uniquely mapping reads since this region is formed via the junction of the V, D and J segments during  
311 VDJ recombination resulting in a unique sequence in the genome (Fig. S2E). PRO-seq and PRO-cap  
312 analysis showed that there were no striking differences at the B1-8<sup>hi</sup> variable region between primary B  
313 cells and GCBs (Fig. 5A). Moreover, we observed local zones of Pol II accumulation, internal initiation  
314 events and antisense/convergent transcription, but these did not necessarily correlate with zones of  
315 mutation (Fig. 5A). As noted previously (48), SHM profiles of B1-8<sup>hi</sup> GCBs are not identical to primary B  
316 cells because GCBs exhibit 5-10 fold higher frequencies of SHM and substantial mutagenesis of A and T  
317 residues arising from error-prone DNA repair of AID-induced mismatches at neighboring C:G residues  
318 (Fig. 5B-C). The palindromic AGCT hotspot in CDR3 is selectively mutated with high frequency in primary  
319 cells, in line with a former report showing that this hotspot is the earliest targeted motif both *in vitro* and *in*  
320 *vivo* (48). Importantly, however, closer inspection showed that even in primary B cells, the same WRCH  
321 motifs appear to be mutated as in GCBs suggesting that AID targeting specificity is not substantially  
322 different between primary B cells and GCBs (Fig. 5B-C), in line with their comparable transcriptional  
323 landscapes (Fig. 5A). We suggest that GCBs may have acquired higher rates of mutation, in part, due to  
324 many more rounds of cell division within germinal centers compared to primary cultures, although the  
325 AGCT hotspot in CDR3 remains enigmatic in this regard. We conclude that the differences in mutation  
326 frequency between primary B cells and GCBs cannot be explained by underlying nascent transcriptional  
327 features. Consequently, as in the case of human variable regions described above, the nascent  
328 transcriptional landscape of the B1-8<sup>hi</sup> variable region is not predictive of the patterns or frequencies of  
329 SHM.

### 330 **The absence of correlation between SHM and nascent transcription is a global feature of SHM**

331 To extend our analysis to non-IG AID targets, we made use of a previously available SHM dataset from  
332 murine GCBs where mutation frequencies at 275 AID target genes were identified by deep sequencing  
333 the first 500 bp from the annotated transcription start site (TSS) (17). In this study, mutation analysis was  
334 performed in GCBs from mice deficient in base excision and mismatch repair pathways (Ung<sup>-/-</sup>Msh2<sup>-/-</sup>).  
335 In these mice, the processing of AID-induced U:G mismatches is abolished and, consequently, DNA

336 replication over these lesions leads to C→T and G→A transition mutations that represent the direct  
337 targets of AID (78). By comparing these data with PRO-seq and PRO-cap obtained from GCBs, we could  
338 compare mutation profiles with those of nascent transcription. Importantly, at many genes, initiation sites  
339 or zones defined by PRO-cap are often located at considerable distances from the annotated TSS  
340 (defined by the RefSeq database and labeled as TSS in Fig. 5D, Fig. S3 and Fig. S4). Consequently, the  
341 500 bp segment sequenced for mutational analysis (17) often begins further upstream or downstream of  
342 the initiation sites newly defined by PRO-cap.

343         The large number of genes in this analysis led to new and unexpected observations regarding the  
344 nature of AID targeting. At virtually all genes, the differential mutation rates of WRCH motifs are evident  
345 with many such motifs being unmutated and many non-WRCH cytidines being as efficiently targeted (Fig.  
346 5D and several additional examples in Figs. S3 and S4). As we observed in variable regions, mutation  
347 frequencies at individual nucleotides and mutation zones did not necessarily correlate with enrichments of  
348 PRO-seq or PRO-cap (Fig. 5D, S3 and S4). For example, at *Bcl6*, the major zone of mutation lies in a  
349 region of low PRO-seq signal where many mutations are not in WRCH motifs (Fig. 5D). At *Myc*, mutations  
350 are observed upstream of the initiation site defined by PRO-cap indicating that mutagenesis can occur in  
351 the antisense orientation (Fig. 5E).

352         In variable and switch regions, mutations initiate ~100-150 bp after the promoter leading to the  
353 notion that AID is somehow excluded from initiating or early elongating Pol II (3, 43, 45, 79, 80). Contrary  
354 to this, we identified a set of genes where the highest mutation frequencies were observed within 100-150  
355 bp of the initiation site defined by PRO-cap (*Irf4* in Fig. 5F and additional examples in Fig. S3A). Indeed,  
356 in some of these genes, the most mutated residues were in very close proximity to the initiation site, such  
357 as *Mcm7* (Fig. 5G). In some other genes, strongly mutated residues coincided with the strongest peak of  
358 initiation (Fig.S3B). These observations indicate that AID can act at the early stages of the transcription  
359 cycle at least at some genes, suggesting that AID is not *per se* excluded from initiating or early elongating  
360 Pol II.

361           Altogether, we conclude that the lack of predictability of mutation spectra from nascent  
362 transcription patterns is observed at both IG variable regions and non-IG AID target genes, indicating that  
363 the absence of correlation between SHM and nascent transcriptional patterns is a global feature of SHM.

364 **SHM targeting of the murine B1-8<sup>hi</sup> variable region is retained in the context of the human *IGH***  
365 **locus**

366 To determine whether the gene regulatory context affects the patterns of SHM and transcription, we  
367 replaced the endogenous variable region in Ramos cells with the entire murine B1-8<sup>hi</sup> variable region  
368 (Ramos<sup>B1-8<sup>hi</sup></sup>) using the strategy described earlier (Fig. 6A and Fig. S2A-B). In this scenario, transcription  
369 and SHM of the murine B1-8<sup>hi</sup> variable region would be under the control of the Ramos VH4-34 promoter  
370 and the human E $\mu$  and 3' *IGH* super-enhancers. This allowed us to ask whether the targeting of SHM to  
371 the B1-8<sup>hi</sup> variable region was influenced by differences in the human versus the mouse enhancers and  
372 promoters.

373           Importantly, when placed in the context of the human *IGH* locus, the B1-8<sup>hi</sup> sequence was  
374 covered almost exclusively by uniquely mapping reads (Fig. 6B), which is in sharp contrast to the  
375 extensive multimapping observed within B1-8<sup>hi</sup> at the murine *Igh* locus (Fig. S2E). This is because the  
376 Vh1-72 gene used in the B1-8<sup>hi</sup> sequence is much less homologous with the human V genes than the  
377 mouse V genes. PRO-seq and PRO-cap revealed that the nascent transcriptional profile of the B1-8<sup>hi</sup>  
378 sequence in Ramos<sup>B1-8<sup>hi</sup></sup> cells (Fig. 6C) shared similarities with the B1-8<sup>hi</sup> sequence in the murine *Igh*  
379 context (Fig. 5A). For example, similarities were noted in CDR3 and flanking sequences, for instance, the  
380 presence of the antisense initiation site (PRO-cap track) and shared spikes of nascent transcriptional  
381 activity (PRO-seq) (Fig. 6C). More importantly, MutPE-seq following AID(JP8Bdel) infection revealed a  
382 very similar SHM spectrum in Ramos<sup>B1-8<sup>hi</sup></sup> cells compared to the murine B1-8<sup>hi</sup> context, especially with  
383 primary murine B cells (Fig. 6D). Of note, the dominant, palindromic AGCT hotspot in CDR3 was the most  
384 mutated residue exactly as in B1-8<sup>hi</sup> murine primary cells and GCBs (Fig. 6D). The other mutated C:G  
385 residues in the Ramos<sup>B1-8<sup>hi</sup></sup> sequence were largely the same as those mutated in the murine context albeit  
386 the relative mutation rates within each variable region varied (Fig. 6D, compare with Fig. 5B-C).  
387 Importantly, mutation frequencies in murine GCBs and AID(JP8Bdel)-expressing Ramos cells were

388 comparable (note the Y axes scales in Fig. 6D) with the major difference being the weak A:T mutagenesis  
389 typical of Ramos cells. Of note, the sense PRO-cap peak in CDR3 in the murine B1-8<sup>hi</sup> (Fig. 5A), located  
390 just 3 bp upstream of the strong AGCT hotspot, is absent in Ramos<sup>B1-8<sup>hi</sup></sup> (Fig. 6C) implying that this  
391 initiation site is not essential for the high mutation frequency of this hotspot motif. In sum, the SHM  
392 spectrum of the B1-8<sup>hi</sup> variable region in mouse B cells is largely retained in Ramos<sup>B1-8<sup>hi</sup></sup> cells despite  
393 dissimilarities in their nascent transcriptional profiles.

394 We conclude that although enhancers are important for recruiting AID to the variable regions and  
395 other non-IG genes, the final rules of mutagenesis are apparently “hard-wired” into the DNA sequence  
396 rather than specific transcriptional features or chromatin marks.

397

## 398 Discussion

399 In this study, we aimed to understand the relationship of SHM spectra with local patterns of nascent  
400 transcription and epigenetic marks using high-resolution profiling of variable regions. We find that the  
401 local SHM patterns and frequencies cannot be predicted from, nor do they appear to be derived from, the  
402 underlying transcriptional landscape. Moreover, substantial loss of actively elongating Pol II and nascent  
403 transcription in both orientations within variable regions, seen in E $\mu$ <sup>-/-</sup> cells, does not majorly impact on  
404 SHM. These results have important implications for the interpretation of transcription and chromatin  
405 modification measurements in the context of SHM or CSR. For example, despite the global correlation of  
406 SHM target genes with activating histone marks, our results suggest that they do not play a major role in  
407 determining SHM frequency or in defining the SHM spectrum. We suspect that in studies depleting  
408 histone modifying enzymes, SHM or CSR defects may result, in part or whole, from secondary effects  
409 arising from perturbation of these global gene regulatory factors. In the case of histone modifying  
410 enzymes, it is plausible that they function independently of their enzymatic activity or via non-histone  
411 substrates, as has been shown for many such enzymes (81-85). Similarly, we infer that although AID  
412 target genes are often enriched in paused Pol II and convergent transcription, these features do not  
413 appear to play a direct, mechanistic role in mutagenesis. Moreover, the fact that SHM remains robust



414 despite up to 4-fold reduced *IGH* nascent transcription in  $E_{\mu}^{-/-}$  cells implies that although SHM requires  
415 transcription, it is not directly correlated with the rate of transcription and, by extension, the level of Pol II  
416 occupancy in the variable region. This has important implications for interpreting the meaning of  
417 correlations between transcription and SHM observed upon gene knockouts or knockdowns. In such  
418 cases, our results suggest that the true cause of the SHM defect may not be due to, or may only partly  
419 result from, decreased transcription.

420         During transcription, the non-template strand is released as ssDNA to allow RNA synthesis.  
421 Hence, this ssDNA bubble has been thought to serve as a source of ssDNA for AID, especially if Pol II is  
422 paused or its elongation rate is slowed down, a situation where ssDNA would be available more stably  
423 and for longer periods. However, our data show no consistent correspondence of mutations hotspots with  
424 sites of Pol II accumulation. From structural studies of paused and elongating Pol II complexes, it is  
425 apparent that of the ~11 nt non-template ssDNA bubble, about half lies buried within Pol II (71, 72) (Fig.  
426 7A). Importantly, the exposed portion (~5 nt) is entirely covered by SPT5 (72) (Fig. 7A). The PAF complex  
427 and SPT6 are located further away from this site (71) (Fig. 7A). Under such structural constraints, it is  
428 difficult to conceive how AID could access the ~5 nt exposed ssDNA and catalyze deamination even if Pol  
429 II were paused or slowly elongating. Thus, it appears unlikely that the transcription bubble is a substrate  
430 for AID which can explain why we observe no correlation between sites of Pol II accumulation and SHM.  
431 Moreover, it appears that SHM at recurrent hotspot residues is not affected by distally located mutations  
432 elsewhere in the variable region (47). This leads us to infer that sequences directly flanking the target  
433 cytidine may be important determinants of mutability.

434         We propose the following four-step model to integrate our data with the literature to date. First,  
435 AID is delivered to IG variable regions and non-IG targets via enhancers (38, 40, 42) (Fig. 7B. step 1).  
436 This is accomplished by chromatin looping between enhancers and target genes, a process that has  
437 been suggested to occur via cohesin-mediated loop extrusion (86). Such interactions can lead to the  
438 formation of enhancer-gene hubs via dynamic, multivalent interactions between Pol II, transcription  
439 factors and cofactors like the Mediator complex. This results in the stabilization of transcription factors  
440 and recruitment of Pol II and cofactors to activate target genes (87-90). Once delivered into the hub, AID

441 associates with Pol II and associated proteins such as SPT5, SPT6 and the PAF complex (Fig. 7B, step  
442 2). We propose that the primary purpose of these interactions is to retain AID in the vicinity of Pol II  
443 complexes. The ability of AID to engage in multiple, independent dynamic interactions ensures that it is  
444 retained within the transcriptional hub, ready to access ssDNA when it is made available. Indeed, the fact  
445 that depletion of any of these proteins leads to AID recruitment defects (21-24) suggests that all such  
446 interactions are contributing to ensure that AID stays within the transcription hub or that these factors are  
447 important for maintaining or forming the hub (90).

448 For successful deamination, ssDNA needs to be exposed and the source of this ssDNA remains  
449 enigmatic (Fig. 7B, step 3). As explained above, the transcriptional bubble appears to be inaccessible.  
450 Previous work has suggested that DNA upstream of the moving Pol II could provide a source of ssDNA  
451 for AID in variable regions since, being negatively supercoiled, it may be more accessible (60, 91).  
452 Patches of ssDNA have been detected in the variable region and it has been suggested that they arise  
453 from negative supercoiling associated with paused Pol II although their presence did not correlate well  
454 with mutation spectra (57, 61, 91). Indeed, AID was shown to target negatively supercoiled DNA, but not  
455 relaxed DNA, on both template and non-template strands (92). However, since we find no correlation  
456 between mutation and pausing, we infer that these ssDNA patches are likely the result of transcription  
457 itself rather than specific sites of pausing.

458 Although, in principle, negative supercoils could create ssDNA patches that allow mutation on  
459 both strands, the fact that significant mutational asymmetry is observed upon depletion of RNA Exosome  
460 subunits or the DNA:RNA helicase, Senataxin (93-95) argues that the species AID likely targets is one  
461 containing an RNA:DNA hybrid. Indeed, the variable region sense transcript is a substrate of the RNA  
462 exosome and the latter is required for optimal mutation of the template strand in the B1-8<sup>hi</sup> variable  
463 region, findings that directly implicate the processing of DNA:RNA hybrids in SHM (93). In this regard, and  
464 in contrast to IG switch regions, variable regions lack R loops (61, 91). Given the presence of ssDNA  
465 patches, the requirement for RNA processing and the lack of R loops, we propose that transcription  
466 termination may provide an important source of ssDNA in variable regions. It is plausible that the collapse  
467 of the elongation complex could release DNA with the nascent RNA within the transcription bubble still

468 hybridized (Fig. 7B, step 4). The RNA would have to be unwound by DNA:RNA helicases like Senataxin  
469 (95) and/or digested with RNaseH followed by degradation from the 5' end by Xrn2 and from the 3' end  
470 by the RNA exosome, thereby providing AID access to the template strand (26, 93-96) (Fig. 7B, step 4).  
471 In this regard, termination has been correlated with SHM (60, 97) and degradation of Pol II by  
472 ubiquitination has been linked to AID targeting (98). We note that if, during multiple rounds of transcription  
473 within a cell population, termination occurs stochastically along the variable region and intron, then such  
474 events would not be detected by population-based transcriptomic assays like PRO-seq or ChIP-seq.

475         Interestingly, recent genome-wide analyses have shown that termination is frequent in the first 3  
476 kb from the promoter (99) which, in the context of the IG genes, would encompass the entire variable  
477 region and, depending on which J segment is used, part or whole of the intronic sequence. Indeed, SHM  
478 starts 100-150 bp from the V gene promoter and extends for another 1.5-2 kb (43-45). Thus, we suspect  
479 that ssDNA patches and DNA:RNA hybrids may arise, at least in part, from premature termination of Pol II  
480 within the variable region. A similar process could occur at the 5' ends of non-IG AID target genes or at  
481 transcribed enhancers that are also targets of AID. Given that neither we nor others have observed any  
482 transcriptional feature correlating with SHM spectra, we favor the idea that deamination occurs on ssDNA  
483 made available through co-transcriptional processes that expose ssDNA patches, such as termination,  
484 but that it is dissociated from actively elongating Pol II (Fig. 7B, step 4). We note, however, that  
485 termination is difficult to measure directly, and how the disassembly of Pol II occurs is poorly understood.  
486 Thus, the mechanism and kinetics of resolution of the DNA:RNA hybrid within terminating Pol II are not  
487 known.

488         The final step, that is, the actual mutagenesis, determines the observed SHM spectra (step 4,  
489 Fig. 7B). AID has a very high affinity for ssDNA and can remain associated with ssDNA for several  
490 minutes which may allow sufficient time for deamination, a reaction which is extremely inefficient and can  
491 take up to several minutes (100, 101). However, WRCH motifs are not equally mutated, suggesting that  
492 the DNA sequence context determines whether ssDNA containing a WRCH motif is mutated and to what  
493 extent, a notion which is supported by biochemical studies (101). Indeed, analyses of variable regions  
494 has suggested that sequence-intrinsic features may regulate the SHM spectra (47, 50-52). Given that

495 neither ssDNA patches nor nascent transcriptional features correlate with SHM spectra, we favor the  
496 notion that sequence context of a WRCH motif determines its mutability and propose that sequence  
497 context regulates the residence time of AID on ssDNA and thereby modulates the catalytic efficiency of  
498 AID *in situ* (Fig. 7B, step 4).

499 The precise contribution of DNA sequence context towards SHM will be a major focus of  
500 investigation for the future with the goal of understanding the rules governing differential mutability.  
501 Insights from such studies could be harnessed to further increase the potency and breadth of mature  
502 broadly neutralizing antibodies where hotspot saturation can prevent further SHM (47). In this regard, our  
503 system of efficiently replacing variable regions in Ramos cells offers an ideal platform for asking how  
504 changes in the sequence locale affects the targeting of SHM to a given hotspot.

505

---

## 506 **Materials and Methods**

### 507 **Cell culturing**

508 Ramos were cultured in complete RPMI medium (in-house) supplemented with 10% fetal bovine serum  
509 (FBS; Invitrogen), glutamine (Invitrogen), sodium pyruvate (Invitrogen), HEPES (made in-house) and  
510 antibiotic/antimycotic (Invitrogen). LentiX packaging cells were cultured in complete DMEM medium (in-  
511 house) containing 10% fetal bovine serum (FBS; Invitrogen), glutamine (Invitrogen), sodium pyruvate  
512 (Invitrogen), HEPES (made in-house) and antibiotic/antimycotic (Invitrogen).

### 513 **Mice**

514 The mice were maintained in a C57BL/6 background and housed in the IMBA-IMP animal facility in  
515 standard IVC cages with HEPA filtering. All animal experiments were carried out with valid breeding and  
516 experimental licenses (GZ: MA58-320337-2019-9, GZ: 925665/2013/20 and GZ: 618046/2018/14)  
517 obtained from the Austrian Veterinary Authorities and in compliance with IMP-IMBA animal house  
518 regulations.

519

520 **Generation of AID<sup>-/-</sup> Ramos cells**

521 We generated Ramos cells expressing EcoR, the receptor for the ecotropic envelope protein, Eco-Env,  
522 so as to allow efficient infection of Ramos cells with ecotropic lentiviruses. Ramos cells were infected with  
523 a pRRL lentiviral vector expressing EcoR and maintained under Puromycin selection. These cells were  
524 transfected with a small guide RNA targeting *AICDA*, the gene expressing AID, and recombinant Cas9  
525 protein via electroporation using the Neon transfection system (Thermo Fisher Scientific). The following  
526 day, single cells were sorted into 96-well plates and allowed to expand. Four weeks later, clones  
527 harboring frameshifting indels at the Cas9 target site were identified by genotyping and loss of AID in  
528 these clones was confirmed by Western blot analysis. One clone (D3) was used for all subsequent  
529 analyses and for generation of new lines.

530 **Generation of E $\mu$ <sup>-/-</sup> Ramos cells**

531 To delete the 583 bp segment containing E $\mu$ , we generated homology repair plasmids having Ef1a  
532 promoter-driven floxed GFP and mCherry expression cassettes flanked by homology arms. These  
533 plasmids were transfected into AID<sup>-/-</sup> Ramos cells (clone D3) along with three in vitro synthesized guide  
534 RNAs (6  $\mu$ g each, designed using CRISPOR) and 7.5  $\mu$ g recombinant Cas9 protein (Vienna Biocenter  
535 Core Facilities) using the Neon Transfection System (Thermo Fisher Scientific). A week later,  
536 GFP/mCherry double-positive single cells were isolated using a BD FACS Aria III sorter (BD  
537 Biosciences). Successful knock-in clones were identified by genotyping with PCR and Sanger sequencing  
538 of PCR products. Next, 200  $\mu$ g recombinant Cre recombinase (Molecular Biology Service, IMP) was  
539 added to the culture medium to excise the floxed mCherry/GFP cassettes. GFP/mCherry double-negative  
540 clones were isolated one week after electroporation using a BD FACS Aria III sorter and genotyped via  
541 PCR and Sanger sequencing of PCR products.

542 **Generation of Ramos cells expressing new, exogenous variable regions**

543 AID<sup>-/-</sup> Ramos cells (clone D3) were electroporated with Cas9-sgRNA ribonucleoprotein complexes  
544 (prepared in-house by the Vienna Biocenter Core Facilities) and homology repair templates containing a  
545 pair of unique sgRNA-target sites to excise the entire variable region including the promoter (Fig. S2A).

546 Single, IgM-negative clones were isolated via flow cytometry, expanded and genotyped. One validated  
547 IgM-negative clone was selected as the parental clone. This clone was then electroporated with Cas9-  
548 sgRNA ribonucleoprotein complexes targeting the unique sgRNA sites and homology repair templates  
549 containing new variable regions under the control of the endogenous Ramos VH4-34 promoter. Single,  
550 IgM-positive cells were isolated, expanded and genotyped.

#### 551 **Lentiviral infections**

552 Lentiviral pRRL vectors expressing AID(JP8Bdel) coupled with mCherry were transfected along with  
553 ecotropic envelope (Eco-env)-expressing helper plasmid into LentiX cells via the standard calcium  
554 phosphate methodology. Lentiviral supernatants were used to infect Ramos cells via spinfection (2350  
555 rpm for 90 min) in the presence of 8  $\mu\text{g/ml}$  Polybrene (Sigma). Flow cytometry was used to sort mCherry-  
556 positive cells for mutation analysis.

#### 557 **Isolation and activation of murine primary, splenic B cells**

558 Mature, naïve B cells were isolated from spleens of 2-4-month-old wild-type C57BL/6, as per established  
559 protocols (Pavri et al., 2010). B cells were cultured in complete RPMI medium supplemented with 10%  
560 fetal bovine serum (FBS) and antibiotics, Interleukin 4 (IL4; made in-house by the Molecular Biology  
561 Service, IMP), 25  $\mu\text{g/ml}$  Lipopolysaccharide (Sigma) and RP105 (made in-house by the Molecular Biology  
562 Service, IMP) and harvested after 3 or 4 days. B1-8<sup>hi</sup> Rosa26<sup>AID<sup>ER</sup></sup> mice were generated by crossing B1-  
563 8<sup>hi</sup> mice (65) with Rosa26<sup>AID<sup>ER</sup></sup> mice (73) and maintained as a homozygous line for both alleles. For SHM  
564 assays from activated B1-8<sup>hi</sup> Rosa26<sup>AID<sup>ER</sup></sup> primary B cells, 2 $\mu\text{M}$  4-hydroxy tamoxifen (4-HT) (Sigma) was  
565 added at the time of activation with IL-4, LPS and RP105.

#### 566 **Isolation of germinal center B cells (GCBs) from immunized B1-8<sup>hi</sup> mice**

567 Sheep red blood cells (SRBCs) were washed thrice with PBS of which 0.2x10<sup>9</sup> SRBCs in 100 $\mu\text{l}$  PBS (per  
568 mouse) were injected followed by another injection of 1x10<sup>9</sup> SRBCs in 100 $\mu\text{l}$  PBS five days later. Mice  
569 were harvested twelve days after the first immunization. Spleens were harvested and single-cell  
570 suspensions were stained with B220 conjugated to fluorescein isothiocyanate (B220-FITC, BD

571 Biosciences, 1:500 dilution), Fas conjugated to PE-cyanine 7 (Fas-PE-Cy7, BD Biosciences, 1:1000  
572 dilution) and CD38 conjugated to Allophycocyanin (CD38-APC, ThermoFisher, 1:200 dilution) along with  
573 Fc block (BD Biosciences, 1:500 dilution). GCBs (B220<sup>+</sup> Fas<sup>+</sup> CD38<sup>-</sup>) were isolated on a BD FACS Aria  
574 II sorter (BD Biosciences). Following sorting, nuclei were isolated and used for PRO-seq and PRO-cap  
575 (see below). For one experiment, ~10<sup>7</sup> GCBs from fifteen immunized mice were pooled yielding 3-4x10<sup>6</sup>  
576 viable nuclei that were used for run-on. For MutPE-seq, genomic DNA was isolated from 15 x10<sup>6</sup> GCBs  
577 as described previously (102).

### 578 **PRO-seq and PRO-cap**

579 PRO-seq was performed as described previously (103) with several modifications.

580 To isolate nuclei, murine and *Drosophila* S2 cells were resuspended in cold Buffer IA (160 mM Sucrose, 10  
581 mM Tris-Cl pH 8, 3 mM CaCl<sub>2</sub>, 2 mM MgAc<sub>2</sub>, 0.5% NP-40, 1 mM DTT added fresh), incubated on ice for 3  
582 min and centrifuged at 700 g for 5 min. The pellet was resuspended in nuclei resuspension buffer NRB  
583 (50 mM Tris-Cl pH 8, 40% Glycerol, 5 mM MgCl<sub>2</sub>, 0.1 mM EDTA). For each run-on, 10<sup>7</sup> nuclei of the  
584 sample and 10% *Drosophila* S2 nuclei were combined in a total of 100 μL NRB and incubated at 30°C for  
585 3 min with 100 μL 2x NRO buffer including 5μl of each 1mM Bio-11-NTPs. In some PRO-cap  
586 experiments, the run-on reaction was performed in the presence of two biotinylated NTPs, Biotin-11-UTP  
587 and Biotin-11-CTP (Perkin-Elmer), and unlabeled ATP and GTP. Subsequent steps were performed as  
588 described (Mahat et al 2016), except that 3' and 5' ligations were performed at 16°C overnight and  
589 CapClip Pyrophosphatase (Biozym Scientific) was used for 5' end decapping. We also used customized  
590 adapters (PRO-seq: 3' RNA adapter:

591 5'5Phos/NNNNNNGAUCGUCGGACUGUAGAACUCUGAAC/3InvdT-3' and 5' RNA adapter: 5'-  
592 CCUUGGCACCCGAGAAUCCANNNN-3'). RNA was reverse transcribed by SuperScript III RT with  
593 RP1 Illumina primer to generate cDNA libraries. Libraries were amplified with barcoding Illumina RPI-x  
594 primers and the universal forward primer RP1 using KAPA HiFi Real-Time PCR Library Amplification Kit.  
595 PRO-cap: 3' linker (DNA oligo): 5rApp/NNNNAGATCGGAAGAGCACACGTCT/3ddC , 5'linker (RNA):  
596 ACACUCUUUCCCUACACGACGCUCUCCGAUCUNNNNNNNNNN, reverse transcription and library  
597 amplification as in PRO-seq but using selected TruSeq\_IDX\_1-48 PCR primers for RT, and the same

598 TruSeq\_IDX PCR primers together with TruSeq Universal Adapter forward primer for PCR. For both  
599 methods amplified libraries were subjected to gel electrophoresis on 2.5% low melting agarose gel and  
600 amplicons from 150 to 350 bp were extracted from the gel (carefully separated from possible linker  
601 dimers), multiplexed and sequenced on Illumina platforms with SR50 or longer read mode.

#### 602 **RT-qPCR**

603 RT-qPCR assays with externally spiked-in *Drosophila* S2 cells were described in detail in our previous  
604 studies (104). Briefly, *Drosophila* S2 cells were mixed with Ramos cells or B1-8<sup>hi</sup> B cells at a ratio of 1:4  
605 ( $4 \times 10^5$  B cells and  $1 \times 10^5$  S2 cells) followed by total RNA extraction with TRIzol reagent (Thermo Fisher),  
606 DNaseI digestion, and cDNA synthesis with random primers. The  $2^{-\Delta\Delta C_t}$  method was used to quantify  
607 the data using the *Drosophila Act5c* transcript for normalization.

#### 608 **ChIP-qPCR and ChIPseq**

609 ChIP-seq and ChIP-qPCR were performed as described previously without any modifications (22, 102).  
610 Antibodies used in this study are listed in Table S1.

#### 611 **ATAC-seq**

612 ATAC-seq was performed exactly as described in detail in our previous work (102).

#### 613 **Mutational analysis by paired-end deep sequencing (MutPE-seq)**

614 MutPE-seq was performed following the principles described in two previous reports (48, 73) with several  
615 adaptations. 80 ng of genomic DNA were amplified by PCR with the Kapa Hifi HS 2x RM (Roche  
616 Diagnostics), For the first PCR, we used 20-25 cycles with  $0.2 \mu\text{M}$  locus-specific primers fused to a  
617 varying number of random nucleotides and to the first part of the Illumina adapter sequences (FW: 5'-  
618 CTCTTTCCCTACACGACGCTCTTCCGATCT-(N)<sub>x</sub>-gene-specific sequence-3'; RV: 5'-  
619 CTGGAGTTCAGACGTGTGCTCTTCCGATCT-gene-specific sequence-3'; see Table S1 for a complete  
620 list of primer sequences). Random Ns are used to increase complexity and shift frames of very similar  
621 amplicons to improve cluster calling and sample identification. After first PCR, the samples were purified  
622 with 0.2x/0.7x SPRI beads (Beckman Coulter), eluted in 10  $\mu\text{l}$  water and amplified for 10 cycles with



623 0.75 $\mu$ M primers containing linker sequences and dual barcoding (FW: 5'-  
624 AATGATACGGCGACCACCGAGATCTACACXXXXXXXXXACACTCTTCCCTACACGAC-3'; RV: 5'-  
625 CAAGCAGAAGACGGCATAACGAGATXXXXXXXXGTGACTGGAGTTCAGACGTGTG-3' where the stretches  
626 of X nucleotides serve as barcodes creating a unique dual barcode combination for each sample). PCR  
627 products were purified either by extraction from a 2% low-melt agarose gel or with 0.7x SPRI beads and  
628 eluted in 20  $\mu$ l water. The concentration was determined by Picogreen-based measurements on a  
629 Nanodrop machine or by a Fragment Analyzer. Samples were equimolarly pooled for next generation  
630 sequencing on an Illumina MiSeq flowcell and sequenced paired-end (PE300).

### 631 **Primers and sgRNAs**

632 All oligos, primers and adapters used in this study are listed in Table S1.

633

### 634 **Bioinformatics**

#### 635 **Mapping PRO-seq, PRO-cap, CHIP-seq and ATAC-seq reads to IG variable regions**

636 Reads were trimmed for standard adapters and low quality (Q<30) 3'-end bases and filtered for a  
637 remaining length of at least 20nt (excluding the UMI, if applicable) using cutadapt (105). Alignment to the  
638 reference genome was done with Bowtie (106). The NCBI GRCm38.6 assembly was used as the mouse  
639 reference. To this we added the sequence of the recombined locus containing the variable region as an  
640 additional chromosome. Similarly, for human data, the Hg38 assembly was used, with the relevant  
641 variable region sequence added as a chromosome. Where applicable, the dmr6 assembly of *Drosophila*  
642 *melanogaster* from Flybase ((107) release 6.27) was used as the spike-in reference and was added to the  
643 alignment index. During alignment, up to three mismatches were allowed. To accommodate mapping to  
644 the repetitive *IGH/Igh* locus, a high degree of multimapping was allowed (194 potential V segments  
645 annotated for GRCm38.6). In the case of alignment with spike-ins, only reads mapping exclusively to  
646 either genome were considered. For PCR deduplication, UMIs were identified and filtered with UMI-tools  
647 ((108) v1.0.0). No sequence differences were allowed in UMIs when collapsing the duplicates.  
648 Multimapping reads were then filtered to identify those specific to the variable region sequence, taking

649 into account the repetitiveness of the reference *IGH/Igh* locus. Reads mapping to the fixed variable region  
650 sequence were allowed to multimap only to the native *IGH/Igh* locus (mouse chr12:113572929-  
651 116009954 or human chr14:105836764-106875071). The native loci were defined as the region between  
652 the earliest position belonging to an annotated V segment and the latest position belonging to an  
653 annotated J segment. Reads with a mapped location outside these areas were rejected. This filtering was  
654 implemented in a custom Python script. The qualifying reads were then classified as reads mapping  
655 uniquely to the particular variable region sequence and reads mapping to both the variable region  
656 sequence and to the native *IGH/Igh* region. Genome browser tracks were created by quantifying and  
657 scaling read coverage of the variable region sequence using bedtools ((109) v2-29.0). Reads were split  
658 by strand, and strand labels for PRO-seq were inverted in order to match the strand designations of the  
659 respective PRO-cap reads. For both data types, only the first 5' base of the strand-adjusted reads was  
660 used for the tracks. Additionally, the 5' end of PRO-seq reads was shifted by 1 nucleotide downstream, to  
661 compensate for the fact that the last nucleotide in the RNA was incorporated during the run-on reaction.  
662 For normalized tracks, read counts were scaled to RPM (reads per million). Finally, “-” strand coverage  
663 tracks were further scaled by -1, for visualization purposes.

664 Code for the workflow and the custom scripts is available on Github at  
665 [https://github.com/PavriLab/IgH\\_VDJ\\_PROcapseq](https://github.com/PavriLab/IgH_VDJ_PROcapseq).

666

### 667 **Analysis of MutPE-seq**

668 Reads were trimmed for standard adapters with cutadapt (105). Poor quality (Q<25) 3' bases were  
669 trimmed with trimmomatic (110) by averaging over a sliding window of 5nt. Read pairs were then filtered  
670 for minimum remaining length (200nt for read 1, 100nt for read 2) using cutadapt. Read mates were  
671 merged down to make combined single-end reads with FLASH (111) allowing 10% mismatch between  
672 the mates. Obvious erroneous mergers were removed by selecting combined reads with lengths within  
673  $\pm 30$ nt of the amplicon length using cutadapt. The remaining combined reads were aligned with Bowtie2  
674 (112), using the “-very-sensitive-local” alignment mode and only the fixed variable region sequence and

675 its immediate vicinity as reference. Samples of V genes VH4-59 and VH4-34 are different only by single  
676 nucleotide polymorphisms and were filtered for contamination by the respective second sequence by  
677 jointly aligning with the “expected” and the other “contaminating” variable region sequence, discarding all  
678 aligned contaminating reads. A pile-up was generated with samtools (113) taking into account only bases  
679 with quality of at least 30. The pileups were then quantified with a custom Python script and the resulting  
680 mutation counts were processed and visualized with custom scripts in R (v3.5.1), with the help of  
681 additional R packages (data.table [<https://cran.r-project.org/web/packages/data.table/index.html>], ggplot2  
682 [<https://cran.r-project.org/web/packages/ggplot2/index.html>] , ggrepel [[https://cran.r-  
684 project.org/web/packages/ggrepel/index.html](https://cran.r-<br/>683 project.org/web/packages/ggrepel/index.html)], patchwork [[https://cran.r-  
686 project.org/web/packages/patchwork/index.html](https://cran.r-<br/>685 project.org/web/packages/patchwork/index.html)]). Background mutation profiles were controlled for by  
685 subtracting the corresponding mutation frequencies in control samples from the frequencies in the  
686 samples of interest, at each position and for each substitution type. Annotation of hot and cold spots was  
687 created by means of regex search for the corresponding patterns in the reference sequence.

688 Code for the workflow and the custom scripts is available on Github at  
689 [https://github.com/PavriLab/IgH\\_VDJ\\_MutPE](https://github.com/PavriLab/IgH_VDJ_MutPE).

## 690 **Data availability**

691 All NGS data has been deposited in GEO under accession number GSE202042.

## 692 **Author contributions**

693 UES performed all PRO-seq, PRO-cap and MutPE-seq assays and analyzed data. JF generated the  
694 Ramos lines with new variable regions and performed infections for MutPE-seq. KF and TN developed  
695 the bioinformatic pipeline to map reads to variable regions, KF developed the bioinformatic pipeline for  
696 MutPE-seq. Marina M performed ChIP-seq, ChIP-qPCR and RT-qPCR in Ramos cells and analyzed data.  
697 IO performed the bioinformatic analysis of non-IG AID target genes. BB performed ChIP-qPCR and RT-  
698 qPCRs. EMW and RP generated the  $E_{\mu}^{-/-}$  lines. MS conducted GCB PRO-seq with UES. ACG performed  
699 ATAC-seq. Marialaura M cloned JP8Bdel expression vectors for MutPE-seq. ACG performed ATAC-seq.  
700 HM provided the germline-reverted VH4-59 and VH3-30 sequences and provided feedback on the

701 manuscript. ITS performed bioinformatic analysis, provided resources and analyzed data. RP conceived  
702 the project, analyzed data and wrote the manuscript with critical inputs from UES and JF.

703

#### 704 **Acknowledgements**

705 We thank Almudena Ramiro and Angel Alvarez-Prado (CNIC, Madrid, Spain) for sharing the mutational  
706 datasets from Ung<sup>-/-</sup>Msh2<sup>-/-</sup> GCBs. We gratefully acknowledge the Vienna Biocenter Core Facilities  
707 (VBCF) for assistance in generating E $\mu$ <sup>-/-</sup> lines and for next generation sequencing, the IMP/IMBA  
708 BioOptics facility for flow cytometry usage, the IMP/IMBA Molecular biology services for Sanger  
709 sequencing and reagents, and the IMP/IMBA animal house. We thank Maximilian von der Linde for  
710 uploading NGS tracks to GEO. We thank Carrie Bernecky (IST, Vienna) and Clemens Plaschka (IMP) for  
711 generating the 3D Pol II elongation complex structural visualizations. This work was funded by Boehringer  
712 Ingelheim, The Austrian Industrial Research Promotion Agency (Headquarter Grant FFG-834223), and  
713 grants from the Austrian Science Fund to UES (FWF T 795-B30) and RP (FWF P 32043-B).

714

#### 715 **Conflicts of interest**

716 The authors declare no conflicts of interest.

717

718

719

720

721

722

723 **Figure Legends**

724 **Figure 1: The E $\mu$  enhancer regulates the chromatin landscape in the intron but not in the variable**  
725 **region in Ramos human B cells. (A)** ChIP-seq profiles of H3K27ac, H3K4me3 and H3K36me3 at the  
726 *IGH* locus from AID<sup>-/-</sup> and two independent clones (c1 and c2) of AID<sup>-/-</sup> E $\mu$ <sup>-/-</sup> Ramos cells, the latter  
727 generated as described in Fig. S1C-D. The sequence annotations indicate the positions of the *IGH*  
728 promoter (Prom), the complementary determining regions (CDR1-3), the intronic enhancer (E $\mu$ ) and the  
729 switch  $\mu$  region (S $\mu$ ). The bioinformatic approach to include multimapping reads (explained in the text and  
730 depicted in Fig. 3A) was applied. **(B)** A magnified view of the locus from A. **(C)** ChIP-qPCR analysis at  
731 *IGH* from AID<sup>-/-</sup> and AID<sup>-/-</sup> E $\mu$ <sup>-/-</sup> Ramos cells (c1, c2) to measure the relative levels of H3K27ac,  
732 H3K4me3, H3K79me3, pan-acetylation of histones H3 and H4, and histone H3. The amplicons used for  
733 PCR are indicated in the schematic diagram at the top. The active *B2M* gene is used as a positive control  
734 and a gene desert on chromosome 1 is used as a negative control (Neg.). The data represent three  
735 independent experiments. Asterisks indicate  $P < 0.05$  using the Student's t-test and ns indicates not  
736 significant ( $P > 0.05$ ).

737

738 **Figure 2: Ablation of the E $\mu$  enhancer significantly decreases nascent transcription but not SHM.**  
739 **(A)** RT-qPCR measurements of nascent transcripts at the Ramos variable region in AID<sup>-/-</sup> and AID<sup>-/-</sup>  
740 E $\mu$ <sup>-/-</sup> cells (c1, c2). To account for potential clonal variation, Ramos cells were spiked with *Drosophila* S2  
741 cells prior to RNA extraction. The data was normalized to the levels of the *Drosophila* housekeeping  
742 gene, *Act5c*. *GAPDH* mRNA was used as a control. Asterisks indicate  $P < 0.05$  using the Student's t-test  
743 and ns indicates not significant ( $P > 0.05$ ). **(B)** RT-qPCR analysis as in A measuring the spliced IgM  
744 mRNA. **(C)** Table of mutation frequencies at the Ramos variable region and the JH6 intron (amplicons  
745 shown in the diagram above the table) in AID<sup>-/-</sup> and AID<sup>-/-</sup> E $\mu$ <sup>-/-</sup> cells following infection with  
746 AID(JP8Bdel) for 6 days. Statistical analysis was performed with the Student's t-test. **(D)** Flow cytometry  
747 analysis of IgM expression in AID<sup>-/-</sup> and AID<sup>-/-</sup> E $\mu$ <sup>-/-</sup> Ramos cells infected with AID(JP8Bdel) for 7 days.

748 **(E)** Bar graph summarizing the flow cytometry analyses from D, showing the percent of IgM loss from  
749 three independent experiments.

750

751 **Figure 3: Comparison of transcriptional and mutational landscapes at the endogenous Ramos**  
752 **variable region. (A)** Scheme depicting the strategy used to align multimapping reads to the variable  
753 region. As described in the text and Methods, since upstream, non-recombined V genes are silent in  
754 Ramos cells, a read that maps to the recombined variable region is retained if it is mapping to any V, D or  
755 J segment of the human *IGH* locus but nowhere else in the human genome. The same principle is applied  
756 when mapping reads to murine variable regions to the mouse genome. **(B)** Integrative Genomics Viewer  
757 (IGV) browser snapshot of nascent RNA 3' ends (by PRO-seq) aligned to the Ramos variable region.  
758 Multimapping (top track) reads are separated from uniquely mapping reads (middle track), and these two  
759 tracks are subsequently combined to generate the total profile (bottom track. **(C)** PRO-cap and PRO-seq  
760 5' and 3' end densities, respectively, at the *IGH* locus along with mutation frequencies at the variable  
761 region displayed on the Integrative Genomics Viewer (IGV) browser. Mapping of the variable region  
762 transcriptome was done via the bioinformatic pipeline outlined in A and exemplified in B (total profiles are  
763 shown). The locations of the antigen-binding complementary determining regions (CDR1-3) are  
764 highlighted. Mutation analysis via MutPE-seq was performed following infection of AID<sup>-/-</sup> cells with  
765 AID(JP8Bdel)-expressing lentiviruses for 6 days. **(D)** A magnified view of the variable region from C  
766 above. **(E)** Details of the mutation spectrum at the Ramos variable region. Mutated cytidines in AID  
767 hotspot motifs (WRCH) are displayed as red bars. All other C:G mutation are shown as black bars and  
768 A:T mutations as grey bars. The panel under the graph shows the position of both hotspot (WRCH in  
769 black, AGCT in red, upper panel) and coldspot (SYC, bottom panel) motifs. **(F)** Waterfall plot with  
770 mutations ordered from highest (left) to lowest (right) frequency following the color code described in E.  
771 **(G)** Mutation frequency bar plot showing the percentages (indicated within the bars) of the three  
772 mutations classes following the color code described in E. **(H)** Bar graph indicating the percentage of the  
773 type of mutation indicated on the X axis. The C→T and G→A transition mutations are the signature of AID  
774 activity.

775 **Figure 4: Comparison of transcriptional and mutational landscapes at two different human**  
776 **variable regions expressed from the Ramos *IGH* locus. (A)** IGV browser snapshots of nascent RNA 5'  
777 (PRO-cap) and 3' (PRO-seq) ends and mutation tracks (MutPE-seq) at the VH4-59-DH2-JH6 variable  
778 region expressed from the Ramos VH4-34 promoter (CDRs 1-3 highlighted). Mutation analysis was  
779 performed following infection of AID<sup>-/-</sup> cells with AID(JP8Bdel)-expressing lentiviruses for 7 days. **(B)** A  
780 magnified view of the VH4-59-DH2-JH6 variable region from A above. **(C)** Detailed mutational analysis of  
781 the VH4-59-DH2-JH6 variable region displayed and color-coded as in Fig. 3E. A bar plot, as in Fig. 3G,  
782 with the percentage of mutation frequencies is shown on the right. **(D)** Nascent transcriptional analysis of  
783 the VH3-30-DH2-JH6 variable region as in A. **(E)** A magnified view of the VH3-30-DH2-JH6 variable  
784 region from D above. **(F)** Detailed mutational analysis of the VH3-30-DH2-JH6 variable region (see C  
785 above for details).

786

787 **Figure 5: Transcriptional and mutational landscapes of the murine B1-8<sup>hi</sup> variable region and non-**  
788 ***Ig* AID target genes in mice. (A)** Nascent transcriptional analysis at the *Igh* locus in murine B1-8<sup>hi</sup>  
789 primary, splenic B cells stimulated for four days with LPS, IL4 and RP105. IGV browser snapshots show  
790 the 5' (PRO-cap) and 3' (PRO-seq) ends of the aligned reads. For MutPE-seq, B1-8<sup>hi</sup> *Rosa26*<sup>AIDER</sup>  
791 primary B cells (expressing AID fused to the estrogen receptor from the *Rosa26* locus) were activated  
792 with LPS, IL4 and RP105 for four days in the presence of 4-hydroxytamoxifen (4-HT) to trigger AIDER  
793 nuclear import. PRO-seq, PRO-cap and MutPE-seq were also performed from sorted, splenic germinal  
794 center B cells (GCBs) following immunization with sheep red blood cells for 11 days. **(B)** Analysis of SHM  
795 spectra of the B1-8<sup>hi</sup> variable region from B1-8<sup>hi</sup> *Rosa26*<sup>AIDER</sup> primary, activated murine splenocytes. The  
796 bar graph on the right shows the percentage of each indicated mutation category (see Fig. 3E and 3G for  
797 details). **(C)** Analysis of SHM spectra of the B1-8<sup>hi</sup> variable region from splenic GCBs following  
798 immunization with sheep red blood cells for 11 days. **(D)** 5' and 3' ends of nascent RNA (PRO-cap, PRO-  
799 seq) and mutation profiles at four selected AID target genes. Mutational data are from Alvarez-Prado et  
800 al. (2018) wherein the first 500 bp of the genes were sequenced. The region displayed extends from -100

801 bp from the annotated (RefSeq) TSS up to 50 bp downstream of the sequenced amplicon. The WRCH  
802 motifs are indicated as red dots.

803

804 **Figure 6: Analysis of gene regulatory context on the nascent transcriptional landscape and SHM**

805 **of the murine B1-8<sup>hi</sup> variable region. (A)** Scheme showing the exchange of the endogenous Ramos

806 variable region for the murine B1-8<sup>hi</sup> variable region to generate the Ramos<sup>B1-8<sup>hi</sup></sup> human *IGH* locus

807 following the approach described in Fig. S2A. **(B)** 3' ends of nascent RNAs by PRO-seq at the Ramos<sup>B1-</sup>

808 <sup>8<sup>hi</sup></sup> *IGH* locus showing the distribution of multimapping, unique and total signal. **(C)** Nascent RNA 5' and 3'

809 ends of PRO-cap and PRO-seq respectively and MutPE-seq analysis at the Ramos<sup>B1-8<sup>hi</sup></sup> *IGH* locus.

810 MutPE-seq was performed following infection with AID(JP8Bdel)-expressing lentiviruses for 7 days. **(D)**

811 Details of the mutation spectrum of the B1-8<sup>hi</sup> variable region expressed from the Ramos *IGH* locus

812 obtained by MutPE-seq. The bar graphs on the right show the percentage of each indicated mutation

813 category (see Fig. 3E and 3G for details). For comparison, the murine B1-8<sup>hi</sup> mutation spectra from

814 primary murine B cells (middle panel) and murine GCBs (bottom panel), exactly as in Fig. 5B-C, are

815 included.

816

817 **Figure 7: Integrative model for co-transcriptional AID targeting and differential motif mutability. (A)**

818 3D structure of the human RNA Pol II elongation complex visualized with ChimeraX. We superimposed,

819 via their RPB1 subunits, the elongation complex structure (PDB ID 6GMH) onto the transcribing Pol II-

820 DSIF (a complex of SPT5 and SPT4) structure (PDB ID 5OIK). Proteins are shown as surfaces (Pol II,

821 grey; DSIF, salmon; SPT6, brown; PAF complex, yellow) and nucleic acids as cartoons (DNA template

822 strand, blue; DNA non-template strand, cyan; RNA, red). The right panel highlights the trajectory of DNA

823 and RNA buried within Pol II. The exposed non-template strand of the transcription bubble is occluded

824 from interactions with AID due to it being completely covered by SPT5. **(B)** Model for SHM. The cartoon

825 diagram of the Pol II elongation complex reflects the actual structure described in (A) above and in the

826 main text. AID is recruited to the Pol II complex via super-enhancers in the context of a transcriptional hub



827 (step 1) and is then retained in the elongation complex via interactions with elongation factors, SPT5,  
828 PAF and SPT6 (step 2). We leave open the possibility that multiple AID molecules can be present in the  
829 hub via association with different elongation factors which would serve to increase the local concentration  
830 of AID. The next step is the availability of ssDNA (step 3). Importantly, since SPT5 covers the exposed  
831 ssDNA, AID has no access to this ssDNA. Sources of ssDNA include upstream negative supercoils (not  
832 shown) which may allow AID to target both strands. Although R loops do not appear to form in variable  
833 regions, the RNA exosome is necessary to ensure normal distribution of mutations on both strands during  
834 SHM which implies that RNA processing is important in SHM. Hence, we propose that transcription  
835 termination may be an important source of ssDNA. Upon dissociation of Pol II, the non-template strand is  
836 available since the DNA:RNA hybrid would prevent immediate reannealing. The RNA is removed by RNA  
837 helicases and RNaseH followed by degradation of the RNA by the RNA exosome, which is known to  
838 associate with AID and provide access to the template strand. AID can bind ssDNA in a sequence-  
839 independent manner with high affinity and remain bound for several minutes (high on-rate, step 4).  
840 Deamination would occur occasionally on exposed WRCH motifs. Importantly, we hypothesize that the  
841 probability of deamination is strongly influenced by the sequence context of the WRCH motif and that this  
842 may be due to differential off-rates of AID in different sequence contexts. Thus, some WRCH motifs are  
843 more frequently deaminated to uridines (U) when they are embedded in a favorable nucleotide context  
844 that retains AID on ssDNA for longer periods (step 4, right) than other contexts where deamination is  
845 inefficient because of the higher dissociation rate of AID (step 4, left).

846

847 **Figure S1: ChIP-qPCR analysis of the Ramos variable region locale and generation of Ramos**  
848  **$E\mu^{-/-}$  cells. (A)** ChIP-qPCR analysis from three independent experiments in  $AID^{-/-}$  Ramos cells for the  
849 indicated epigenetic marks as well as histone H3. Amplicons (1-7) used are indicated below the locus  
850 diagram shown above the graphs. The Neg. amplicon corresponds to a gene desert on chromosome 1  
851 and is used as a negative control. **(B)** ChIP-qPCR analysis from three independent experiments in B1-8<sup>hi</sup>  
852 primary splenic cells for the indicated epigenetic marks as well as histone H3. Amplicons (1-6) used are  
853 indicated below the locus diagram shown above the graphs. The Neg. (negative region) amplicon

854 corresponds to a gene desert on chromosome 1 and is used as a negative control. **(C)** Strategy to create  
855 the  $E_{\mu}^{-/-}$   $AID^{-/-}$  Ramos lines. The deleted region (583 bp) corresponds to the peak of accessible  
856 chromatin detected by ATAC-seq (top panel). This segment was replaced with a floxed reporter cassette  
857 expressing GFP or mCherry using CRISPR. Single clones double-positive for GFP and mCherry  
858 expression were isolated followed by excision of the floxed cassette by Cre recombinase. Two clones, c1  
859 and c2 were used for all experiments. **(D)** Genotyping PCR analysis to confirm the loss of  $E_{\mu}$  in  $AID^{-/-}$   
860  $E_{\mu}^{-/-}$  clones c1 and c2. The location of primers is shown in the diagram above the gel image. **(E)** Surface  
861 IgM expression in  $E_{\mu}^{-/-}$   $AID^{-/-}$  Ramos clones relative to the parental  $AID^{-/-}$  line determined by FACS. **(F)**  
862 Analysis of nascent transcription 3' ends (PRO-seq) at the *IGH* locus in  $AID^{-/-}$  and  $AID^{-/-}$   $E_{\mu}^{-/-}$  Ramos  
863 cells (c1, c2). The promoter (Prom.), complementary determining regions (CDR 1-3), intronic enhancer  
864 ( $E_{\mu}$ ) and switch  $\mu$  region ( $S_{\mu}$ ). **(G)** As in F but showing a magnified view of the variable region locale.

865

866 **Figure S2: Generation of Ramos cell lines expressing exogenous variable region.** **(A)** Schematic  
867 representation of the workflow (described in Methods) for generating Ramos cells expressing new  
868 variable regions using CRISPR-based editing. An IgM-negative line was made by excising the  
869 endogenous variable region and replacing it with a unique small guide RNA (sgRNA)-targeting sequence  
870 (green). Subsequently, an sgRNA targeting this site is combined with Cas9 and homology repair  
871 templates harboring any new variable regions to restore IgM expression. In essence, this system uses the  
872 restoration of IgM expression, which can occur only upon correct integration of the new variable regions,  
873 as a rapid and sensitive means to identify correctly targeted clones via flow cytometry (Fig. S4B). **(B)**  
874 Flow cytometry analysis of Ramos cell clones expressing new human and mouse variable regions used in  
875 this study (see scheme in Fig. 2C). Starting from  $AID^{-/-}$  cells, the endogenous variable region was deleted  
876 ( $AID^{-/-}\Delta V$ ) followed by re-insertion of new variable regions. Shown are three clones of human VH4-59-  
877 DH2-JH6 and human VH3-30-DH2-JH6 expressing Ramos cells, and two clones of B1-8<sup>hi</sup> expressing  
878 Ramos cells. **(C)** PRO-seq analysis showing the 3' ends of aligned reads at the human VH4-59-DH2-JH6  
879 variable region expressed from the VH4-34 promoter at the human *IGH* in Ramos cells. Tracks of  
880 Multimapping, uniquely mapping and total are shown (see Fig. 3A and 3B for detailed description). **(D)**

881 PRO-seq analysis as in C of the human VH3-30-DH2-JH6 variable region expressed from the VH4-34  
882 promoter at the human *IGH* in Ramos cells. **(E)** PRO-seq analysis as in C at the murine B1-8<sup>hi</sup> variable  
883 region at the *Igh* locus in mice.

884

885 **Figure S3: Analysis of PRO-cap, PRO-seq and SHM at non-Ig AID target genes in murine GCBs.**

886 **(A)** 5' and 3' ends of nascent RNA (PRO-cap, PRO-seq) and mutation profiles (from Alvarez-Prado et al.  
887 (2018) at selected AID target genes as in Fig. 5D-G. Shown are genes where highly mutated residues lie  
888 within 150 bp of the transcription initiation site defined by the peak of PRO-cap signals. The WRCH motifs  
889 are indicated as red dots. **(B)** As in A but showing genes where highly mutated residues lie near the  
890 transcription initiation site defined by the peak of PRO-cap signals.

891

892 **Figure S4: Additional examples of PRO-cap, PRO-seq and SHM at non-Ig AID target genes in**  
893 **murine GCBs.** See Fig. 5D for detailed legend.

894

895

896

897

898

899

900

901

902

903 **References**

- 904 1. S. P. Methot, J. M. Di Noia, Molecular Mechanisms of Somatic Hypermutation and Class Switch  
905 Recombination. *Adv Immunol* **133**, 37-87 (2017).
- 906 2. J. U. Peled *et al.*, The Biochemistry of Somatic Hypermutation. *Annu Rev Immunol* **26**, 481-511  
907 (2008).
- 908 3. V. H. Odegard, D. G. Schatz, Targeting of somatic hypermutation. *Nat Rev Immunol* **6**, 573-583  
909 (2006).
- 910 4. G. D. Victora, M. C. Nussenzweig, Germinal centers. *Annu Rev Immunol* **30**, 429-457 (2012).
- 911 5. M. Muramatsu *et al.*, Class switch recombination and hypermutation require activation-induced  
912 cytidine deaminase (AID), a potential RNA editing enzyme. *Cell* **102**, 553-563 (2000).
- 913 6. P. Revy *et al.*, Activation-induced cytidine deaminase (AID) deficiency causes the autosomal  
914 recessive form of the Hyper-IgM syndrome (HIGM2). *Cell* **102**, 565-575 (2000).
- 915 7. S. K. Petersen-Mahrt, R. S. Harris, M. S. Neuberger, AID mutates E. coli suggesting a DNA  
916 deamination mechanism for antibody diversification. *Nature* **418**, 99-103 (2002).
- 917 8. A. R. Ramiro, P. Stavropoulos, M. Jankovic, M. C. Nussenzweig, Transcription enhances AID-  
918 mediated cytidine deamination by exposing single-stranded DNA on the nontemplate strand.  
919 *Nat Immunol* **4**, 452-456 (2003).
- 920 9. R. Bransteitter, P. Pham, M. D. Scharff, M. F. Goodman, Activation-induced cytidine deaminase  
921 deaminates deoxycytidine on single-stranded DNA but requires the action of RNase. *Proc Natl*  
922 *Acad Sci U S A* **100**, 4102-4107 (2003).
- 923 10. P. Pham, R. Bransteitter, J. Petruska, M. F. Goodman, Processive AID-catalysed cytosine  
924 deamination on single-stranded DNA simulates somatic hypermutation. *Nature* **424**, 103-107  
925 (2003).
- 926 11. J. Chaudhuri *et al.*, Transcription-targeted DNA deamination by the AID antibody diversification  
927 enzyme. *Nature* **422**, 726-730 (2003).
- 928 12. B. Vaidyanathan, W.-F. Yen, J. Pucella, J. Chaudhuri, AIDing Chromatin and Transcription-  
929 Coupled Orchestration of Immunoglobulin Class-Switch Recombination. *Frontiers in Immunology*  
930 **5**, (2014).
- 931 13. R. J. Leeman-Neill, J. Lim, U. Basu, The Common Key to Class-Switch Recombination and Somatic  
932 Hypermutation: Discovery of AID and Its Role in Antibody Gene Diversification. *The Journal of*  
933 *Immunology* **201**, 2527-2529 (2018).
- 934 14. T. Saha, D. Sundaravinayagam, M. Di Virgilio, Charting a DNA Repair Roadmap for  
935 Immunoglobulin Class Switch Recombination. *Trends Biochem Sci*, (2020).
- 936 15. J. Chaudhuri, F. W. Alt, Class-switch recombination: interplay of transcription, DNA deamination  
937 and DNA repair. *Nat Rev Immunol* **4**, 541-552 (2004).
- 938 16. M. Liu *et al.*, Two levels of protection for the B cell genome during somatic hypermutation.  
939 *Nature* **451**, 841-845 (2008).
- 940 17. A. F. Alvarez-Prado *et al.*, A broad atlas of somatic hypermutation allows prediction of  
941 activation-induced deaminase targets. *J Exp Med* **215**, 761-771 (2018).
- 942 18. A. Yamane *et al.*, Deep-sequencing identification of the genomic targets of the cytidine  
943 deaminase AID and its cofactor RPA in B lymphocytes. *Nat Immunol*, (2010).
- 944 19. H. M. Shen, A. Peters, B. Baron, X. Zhu, U. Storb, Mutation of BCL-6 gene in normal B cells by the  
945 process of somatic hypermutation of Ig genes. *Science* **280**, 1750-1752 (1998).
- 946 20. L. Pasqualucci *et al.*, Hypermutation of multiple proto-oncogenes in B-cell diffuse large-cell  
947 lymphomas. *Nature* **412**, 341-346 (2001).

- 948 21. S. P. Methot *et al.*, A licensing step links AID to transcription elongation for mutagenesis in B  
949 cells. *Nat Commun* **9**, 1248 (2018).
- 950 22. R. Pavri *et al.*, Activation-induced cytidine deaminase targets DNA at sites of RNA polymerase II  
951 stalling by interaction with Spt5. *Cell* **143**, 122-133 (2010).
- 952 23. K. L. Willmann *et al.*, A role for the RNA pol II-associated PAF complex in AID-induced immune  
953 diversification. *J Exp Med* **209**, 2099-2111 (2012).
- 954 24. N. A. Begum, A. Stanlie, M. Nakata, H. Akiyama, T. Honjo, The histone chaperone Spt6 is  
955 required for activation-induced cytidine deaminase target determination through H3K4me3  
956 regulation. *J Biol Chem* **287**, 32415-32429 (2012).
- 957 25. Y. Nambu *et al.*, Transcription-coupled events associating with immunoglobulin switch region  
958 chromatin. *Science* **302**, 2137-2140 (2003).
- 959 26. U. Basu *et al.*, The RNA exosome targets the AID cytidine deaminase to both strands of  
960 transcribed duplex DNA substrates. *Cell* **144**, 353-363 (2011).
- 961 27. U. Nowak, A. J. Matthews, S. Zheng, J. Chaudhuri, The splicing regulator PTBP2 interacts with the  
962 cytidine deaminase AID and promotes binding of AID to switch-region DNA. *Nat Immunol* **12**,  
963 160-166 (2011).
- 964 28. Z. Duan *et al.*, Role of Dot1L and H3K79 methylation in regulating somatic hypermutation of  
965 immunoglobulin genes. *Proc Natl Acad Sci U S A* **118**, (2021).
- 966 29. G. Yu *et al.*, The role of HIRA-dependent H3.3 deposition and its modifications in the somatic  
967 hypermutation of immunoglobulin variable regions. *Proc Natl Acad Sci U S A* **118**, (2021).
- 968 30. M. Aida, N. Hamad, A. Stanlie, N. A. Begum, T. Honjo, Accumulation of the FACT complex, as well  
969 as histone H3.3, serves as a target marker for somatic hypermutation. *Proc Natl Acad Sci U S A*  
970 **110**, 7784-7789 (2013).
- 971 31. B. P. Jeevan-Raj *et al.*, Epigenetic tethering of AID to the donor switch region during  
972 immunoglobulin class switch recombination. *J Exp Med* **208**, 1649-1660 (2011).
- 973 32. A. Stanlie, M. Aida, M. Muramatsu, T. Honjo, N. A. Begum, Histone3 lysine4 trimethylation  
974 regulated by the facilitates chromatin transcription complex is critical for DNA cleavage in class  
975 switch recombination. *Proc Natl Acad Sci U S A* **107**, 22190-22195 (2010).
- 976 33. S. P. Bradley, D. A. Kaminski, A. H. F. M. Peters, T. Jenuwein, J. Stavnezer, The Histone  
977 Methyltransferase Suv39h1 Increases Class Switch Recombination Specifically to IgA. *The Journal*  
978 *of Immunology* **177**, 1179-1188 (2006).
- 979 34. F. L. Kuang, Z. Luo, M. D. Scharff, H3 trimethyl K9 and H3 acetyl K9 chromatin modifications are  
980 associated with class switch recombination. *Proceedings of the National Academy of Sciences*  
981 **106**, 5288-5293 (2009).
- 982 35. J. A. Daniel *et al.*, PTIP promotes chromatin changes critical for immunoglobulin class switch  
983 recombination. *Science* **329**, 917-923 (2010).
- 984 36. B. Vaidyanathan, J. Chaudhuri, Epigenetic Codes Programing Class Switch Recombination. *Front*  
985 *Immunol* **6**, 405 (2015).
- 986 37. J. M. Buerstedde, J. Alinikula, H. Arakawa, J. J. McDonald, D. G. Schatz, Targeting of somatic  
987 hypermutation by immunoglobulin enhancer and enhancer-like sequences. *PLoS Biol* **12**,  
988 e1001831 (2014).
- 989 38. F. Senigl *et al.*, Topologically Associated Domains Delineate Susceptibility to Somatic  
990 Hypermutation. *Cell Rep* **29**, 3902-3915 e3908 (2019).
- 991 39. R. K. Dinesh *et al.*, Transcription factor binding at Ig enhancers is linked to somatic  
992 hypermutation targeting. *Eur J Immunol* **50**, 380-395 (2020).
- 993 40. J. Qian *et al.*, B cell super-enhancers and regulatory clusters recruit AID tumorigenic activity. *Cell*  
994 **159**, 1524-1537 (2014).

- 995 41. P. Rouaud *et al.*, The IgH 3' regulatory region controls somatic hypermutation in germinal center  
996 B cells. *J Exp Med* **210**, 1501-1507 (2013).
- 997 42. S. Peron *et al.*, AID-driven deletion causes immunoglobulin heavy chain locus suicide  
998 recombination in B cells. *Science* **336**, 931-934 (2012).
- 999 43. J. M. Di Noia, M. S. Neuberger, Molecular mechanisms of antibody somatic hypermutation.  
1000 *Annu Rev Biochem* **76**, 1-22 (2007).
- 1001 44. R. W. Maul, P. J. Gearhart, AID and somatic hypermutation. *Adv Immunol* **105**, 159-191 (2010).
- 1002 45. R. Pavri, M. C. Nussenzweig, AID targeting in antibody diversity. *Adv Immunol* **110**, 1-26 (2011).
- 1003 46. A. G. Betz, C. Rada, R. Pannell, C. Milstein, M. S. Neuberger, Passenger transgenes reveal  
1004 intrinsic specificity of the antibody hypermutation mechanism: clustering, polarity, and specific  
1005 hot spots. *Proc Natl Acad Sci U S A* **90**, 2385-2388 (1993).
- 1006 47. J. K. Hwang *et al.*, Sequence intrinsic somatic mutation mechanisms contribute to affinity  
1007 maturation of VRC01-class HIV-1 broadly neutralizing antibodies. *Proc Natl Acad Sci U S A* **114**,  
1008 8614-8619 (2017).
- 1009 48. L. S. Yeap *et al.*, Sequence-Intrinsic Mechanisms that Target AID Mutational Outcomes on  
1010 Antibody Genes. *Cell* **163**, 1124-1137 (2015).
- 1011 49. J. Q. Zhou, S. H. Kleinstein, Position-Dependent Differential Targeting of Somatic Hypermutation.  
1012 *The Journal of Immunology*, j12000496 (2020).
- 1013 50. N. Spisak, A. M. Walczak, T. Mora, Learning the heterogeneous hypermutation landscape of  
1014 immunoglobulins from high-throughput repertoire data. *Nucleic Acids Research* **48**, 10702-  
1015 10712 (2020).
- 1016 51. C. Tang, A. Krantsevich, T. MacCarthy, Deep learning model of somatic hypermutation reveals  
1017 importance of sequence context beyond hotspot targeting. *iScience* **25**, 103668 (2022).
- 1018 52. J. Q. Zhou, S. H. Kleinstein, Position-Dependent Differential Targeting of Somatic Hypermutation.  
1019 *J Immunol* **205**, 3468-3479 (2020).
- 1020 53. F. L. Meng *et al.*, Convergent transcription at intragenic super-enhancers targets AID-initiated  
1021 genomic instability. *Cell* **159**, 1538-1548 (2014).
- 1022 54. D. Rajagopal *et al.*, Immunoglobulin switch mu sequence causes RNA polymerase II  
1023 accumulation and reduces dA hypermutation. *J Exp Med* **206**, 1237-1244 (2009).
- 1024 55. L. Wang, R. Wuerffel, S. Feldman, A. A. Khamlichi, A. L. Kenter, S region sequence, RNA  
1025 polymerase II, and histone modifications create chromatin accessibility during class switch  
1026 recombination. *J Exp Med* **206**, 1817-1830 (2009).
- 1027 56. R. W. Maul *et al.*, Spt5 accumulation at variable genes distinguishes somatic hypermutation in  
1028 germinal center B cells from ex vivo-activated cells. *J Exp Med* **211**, 2297-2306 (2014).
- 1029 57. A. Tarsalainen *et al.*, Ig Enhancers Increase RNA Polymerase II Stalling at Somatic Hypermutation  
1030 Target Sequences. *J Immunol* **208**, 143-154 (2022).
- 1031 58. B. J. Taylor, Y. L. Wu, C. Rada, Active RNAP pre-initiation sites are highly mutated by cytidine  
1032 deaminases in yeast, with AID targeting small RNA genes. *Elife* **3**, e03553 (2014).
- 1033 59. X. Wang, M. Fan, S. Kalis, L. Wei, M. D. Scharff, A source of the single-stranded DNA substrate  
1034 for activation-induced deaminase during somatic hypermutation. *Nature Communications* **5**,  
1035 4137 (2014).
- 1036 60. P. Kodgire, P. Mukkavar, S. Ratnam, T. E. Martin, U. Storb, Changes in RNA polymerase II  
1037 progression influence somatic hypermutation of Ig-related genes by AID. *J Exp Med* **210**, 1481-  
1038 1492 (2013).
- 1039 61. D. Ronai *et al.*, Detection of chromatin-associated single-stranded DNA in regions targeted for  
1040 somatic hypermutation. *J Exp Med* **204**, 181-190 (2007).
- 1041 62. H. Kwak, N. J. Fuda, L. J. Core, J. T. Lis, Precise maps of RNA polymerase reveal how promoters  
1042 direct initiation and pausing. *Science* **339**, 950-953 (2013).

- 1043 63. J. E. Sale, M. S. Neuberger, TdT-accessible breaks are scattered over the immunoglobulin V  
1044 domain in a constitutively hypermutating B cell line. *Immunity* **9**, 859-869 (1998).
- 1045 64. E. Pinaud *et al.*, The IgH locus 3' regulatory region: pulling the strings from behind. *Adv Immunol*  
1046 **110**, 27-70 (2011).
- 1047 65. T. A. Shih, M. Roederer, M. C. Nussenzweig, Role of antigen receptor affinity in T cell-  
1048 independent antibody responses in vivo. *Nat Immunol* **3**, 399-406 (2002).
- 1049 66. S. Ito *et al.*, Activation-induced cytidine deaminase shuttles between nucleus and cytoplasm like  
1050 apolipoprotein B mRNA editing catalytic polypeptide 1. *Proc Natl Acad Sci U S A* **101**, 1975-1980  
1051 (2004).
- 1052 67. T. Perlot, F. W. Alt, C. H. Bassing, H. Suh, E. Pinaud, Elucidation of IgH intronic enhancer  
1053 functions via germ-line deletion. *Proc Natl Acad Sci U S A* **102**, 14362-14367 (2005).
- 1054 68. F. Li, Y. Yan, J. Pieretti, D. A. Feldman, L. A. Eckhardt, Comparison of identical and functional Igh  
1055 alleles reveals a nonessential role for Emu in somatic hypermutation and class-switch  
1056 recombination. *J Immunol* **185**, 6049-6057 (2010).
- 1057 69. Y. Yamaguchi *et al.*, NELF, a multisubunit complex containing RD, cooperates with DSIF to  
1058 repress RNA polymerase II elongation. *Cell* **97**, 41-51 (1999).
- 1059 70. S. M. Vos, L. Farnung, H. Urlaub, P. Cramer, Structure of paused transcription complex Pol II-  
1060 DSIF-NELF. *Nature* **560**, 601-606 (2018).
- 1061 71. S. M. Vos *et al.*, Structure of activated transcription complex Pol II-DSIF-PAF-SPT6. *Nature* **560**,  
1062 607-612 (2018).
- 1063 72. C. Bernecky, J. M. Plitzko, P. Cramer, Structure of a transcribing RNA polymerase II-DSIF complex  
1064 reveals a multidentate DNA-RNA clamp. *Nature Structural & Molecular Biology* **24**, 809-815  
1065 (2017).
- 1066 73. D. F. Robbiani *et al.*, Plasmodium Infection Promotes Genomic Instability and AID-Dependent B  
1067 Cell Lymphoma. *Cell* **162**, 727-737 (2015).
- 1068 74. H. Mouquet *et al.*, Complex-type N-glycan recognition by potent broadly neutralizing HIV  
1069 antibodies. *Proc Natl Acad Sci U S A* **109**, E3268-3277 (2012).
- 1070 75. V. Lorin *et al.*, Epitope convergence of broadly HIV-1 neutralizing IgA and IgG antibody lineages  
1071 in a viremic controller. *J Exp Med* **219**, (2022).
- 1072 76. F. Matsuda *et al.*, The complete nucleotide sequence of the human immunoglobulin heavy chain  
1073 variable region locus. *J Exp Med* **188**, 2151-2162 (1998).
- 1074 77. T. A. Shih, E. Meffre, M. Roederer, M. C. Nussenzweig, Role of BCR affinity in T cell dependent  
1075 antibody responses in vivo. *Nat Immunol* **3**, 570-575 (2002).
- 1076 78. C. Rada, J. M. Di Noia, M. S. Neuberger, Mismatch recognition and uracil excision provide  
1077 complementary paths to both Ig switching and the A/T-focused phase of somatic mutation. *Mol*  
1078 *Cell* **16**, 163-171 (2004).
- 1079 79. S. Longerich, A. Tanaka, G. Bozek, D. Nicolae, U. Storb, The very 5' end and the constant region  
1080 of Ig genes are spared from somatic mutation because AID does not access these regions. *J Exp*  
1081 *Med* **202**, 1443-1454 (2005).
- 1082 80. K. Xue, C. Rada, M. S. Neuberger, The in vivo pattern of AID targeting to immunoglobulin switch  
1083 regions deduced from mutation spectra in msh2<sup>-/-</sup> ung<sup>-/-</sup> mice. *J Exp Med* **203**, 2085-2094  
1084 (2006).
- 1085 81. K. M. Dorigi *et al.*, Mll3 and Mll4 Facilitate Enhancer RNA Synthesis and Transcription from  
1086 Promoters Independently of H3K4 Monomethylation. *Mol Cell* **66**, 568-576 e564 (2017).
- 1087 82. J. Kim *et al.*, Polycomb- and Methylation-Independent Roles of EZH2 as a Transcription  
1088 Activator. *Cell Rep* **25**, 2808-2820.e2804 (2018).
- 1089 83. T. Hoshii *et al.*, A Non-catalytic Function of SETD1A Regulates Cyclin K and the DNA Damage  
1090 Response. *Cell* **172**, 1007-1021.e1017 (2018).

- 1091 84. C. Wang *et al.*, UTX regulates mesoderm differentiation of embryonic stem cells independent of  
1092 H3K27 demethylase activity. *Proc Natl Acad Sci U S A* **109**, 15324-15329 (2012).
- 1093 85. Y. Aubert, S. Egolf, B. C. Capell, The Unexpected Noncatalytic Roles of Histone Modifiers in  
1094 Development and Disease. *Trends Genet* **35**, 645-657 (2019).
- 1095 86. X. Zhang *et al.*, Fundamental roles of chromatin loop extrusion in antibody class switching.  
1096 *Nature* **575**, 385-389 (2019).
- 1097 87. S. Chong *et al.*, Imaging dynamic and selective low-complexity domain interactions that control  
1098 gene transcription. *Science* **361**, (2018).
- 1099 88. X. Darzacq, R. Tjian, Weak multivalent biomolecular interactions: a strength versus numbers tug  
1100 of war with implications for phase partitioning. *RNA* **28**, 48-51 (2022).
- 1101 89. J. P. Karr, J. J. Ferrie, R. Tjian, X. Darzacq, The transcription factor activity gradient (TAG) model:  
1102 contemplating a contact-independent mechanism for enhancer-promoter communication.  
1103 *Genes Dev* **36**, 7-16 (2022).
- 1104 90. B. Lim, M. S. Levine, Enhancer-promoter communication: hubs or loops? *Current Opinion in*  
1105 *Genetics & Development* **67**, 5-9 (2021).
- 1106 91. J. Y. Parsa *et al.*, Negative supercoiling creates single-stranded patches of DNA that are  
1107 substrates for AID-mediated mutagenesis. *PLoS Genet* **8**, e1002518 (2012).
- 1108 92. H. M. Shen, U. Storb, Activation-induced cytidine deaminase (AID) can target both DNA strands  
1109 when the DNA is supercoiled. *Proc Natl Acad Sci U S A* **101**, 12997-13002 (2004).
- 1110 93. B. Laffleur *et al.*, Noncoding RNA processing by DIS3 regulates chromosomal architecture and  
1111 somatic hypermutation in B cells. *Nature Genetics* **53**, 230-242 (2021).
- 1112 94. J. Lim *et al.*, Nuclear Proximity of Mtr4 to RNA Exosome Restricts DNA Mutational Asymmetry.  
1113 *Cell* **169**, 523-537 e515 (2017).
- 1114 95. D. Kazadi *et al.*, Effects of senataxin and RNA exosome on B-cell chromosomal integrity. *Heliyon*  
1115 **6**, e03442 (2020).
- 1116 96. L. Nair, H. Chung, U. Basu, Regulation of long non-coding RNAs and genome dynamics by the  
1117 RNA surveillance machinery. *Nat Rev Mol Cell Biol* **21**, 123-136 (2020).
- 1118 97. X. Wang, M. Fan, S. Kalis, L. Wei, M. D. Scharff, A source of the single-stranded DNA substrate  
1119 for activation-induced deaminase during somatic hypermutation. *Nat Commun* **5**, 4137 (2014).
- 1120 98. J. Sun *et al.*, E3-ubiquitin ligase Nedd4 determines the fate of AID-associated RNA polymerase II  
1121 in B cells. *Genes Dev* **27**, 1821-1833 (2013).
- 1122 99. S. Lykke-Andersen *et al.*, Integrator is a genome-wide attenuator of non-productive  
1123 transcription. *Mol Cell* **81**, 514-529.e516 (2021).
- 1124 100. M. Larijani *et al.*, AID associates with single-stranded DNA with high affinity and a long complex  
1125 half-life in a sequence-independent manner. *Mol Cell Biol* **27**, 20-30 (2007).
- 1126 101. P. Pham, P. Calabrese, S. J. Park, M. F. Goodman, Analysis of a Single-stranded DNA-scanning  
1127 Process in Which Activation-induced Deoxycytidine Deaminase (AID) Deaminates C to U  
1128 Haphazardly and Inefficiently to Ensure Mutational Diversity\* . *Journal of Biological Chemistry*  
1129 **286**, 24931-24942 (2011).
- 1130 102. J. Fitz *et al.*, Spt5-mediated enhancer transcription directly couples enhancer activation with  
1131 physical promoter interaction. *Nat Genet* **52**, 505-515 (2020).
- 1132 103. D. B. Mahat *et al.*, Base-pair-resolution genome-wide mapping of active RNA polymerases using  
1133 precision nuclear run-on (PRO-seq). *Nat Protoc* **11**, 1455-1476 (2016).
- 1134 104. J. Fitz, T. Neumann, R. Pavri, Regulation of RNA polymerase II processivity by Spt5 is restricted to  
1135 a narrow window during elongation. *EMBO J* **37**, (2018).
- 1136 105. M. Martin, Cutadapt removes adapter sequences from high-throughput sequencing reads. *2011*  
1137 **17**, 3 (2011).



- 1138 106. B. Langmead, C. Trapnell, M. Pop, S. L. Salzberg, Ultrafast and memory-efficient alignment of  
1139 short DNA sequences to the human genome. *Genome Biol* **10**, R25 (2009).
- 1140 107. A. Larkin *et al.*, FlyBase: updates to the *Drosophila melanogaster* knowledge base. *Nucleic Acids*  
1141 *Research* **49**, D899-D907 (2020).
- 1142 108. T. Smith, A. Heger, I. Sudbery, UMI-tools: modeling sequencing errors in Unique Molecular  
1143 Identifiers to improve quantification accuracy. *Genome Res* **27**, 491-499 (2017).
- 1144 109. A. R. Quinlan, I. M. Hall, BEDTools: a flexible suite of utilities for comparing genomic features.  
1145 *Bioinformatics* **26**, 841-842 (2010).
- 1146 110. A. M. Bolger, M. Lohse, B. Usadel, Trimmomatic: a flexible trimmer for Illumina sequence data.  
1147 *Bioinformatics* **30**, 2114-2120 (2014).
- 1148 111. T. Magoč, S. L. Salzberg, FLASH: fast length adjustment of short reads to improve genome  
1149 assemblies. *Bioinformatics* **27**, 2957-2963 (2011).
- 1150 112. B. Langmead, S. L. Salzberg, Fast gapped-read alignment with Bowtie 2. *Nature Methods* **9**, 357-  
1151 359 (2012).
- 1152 113. H. Li *et al.*, The Sequence Alignment/Map format and SAMtools. *Bioinformatics* **25**, 2078-2079  
1153 (2009).
- 1154

# Figure 1

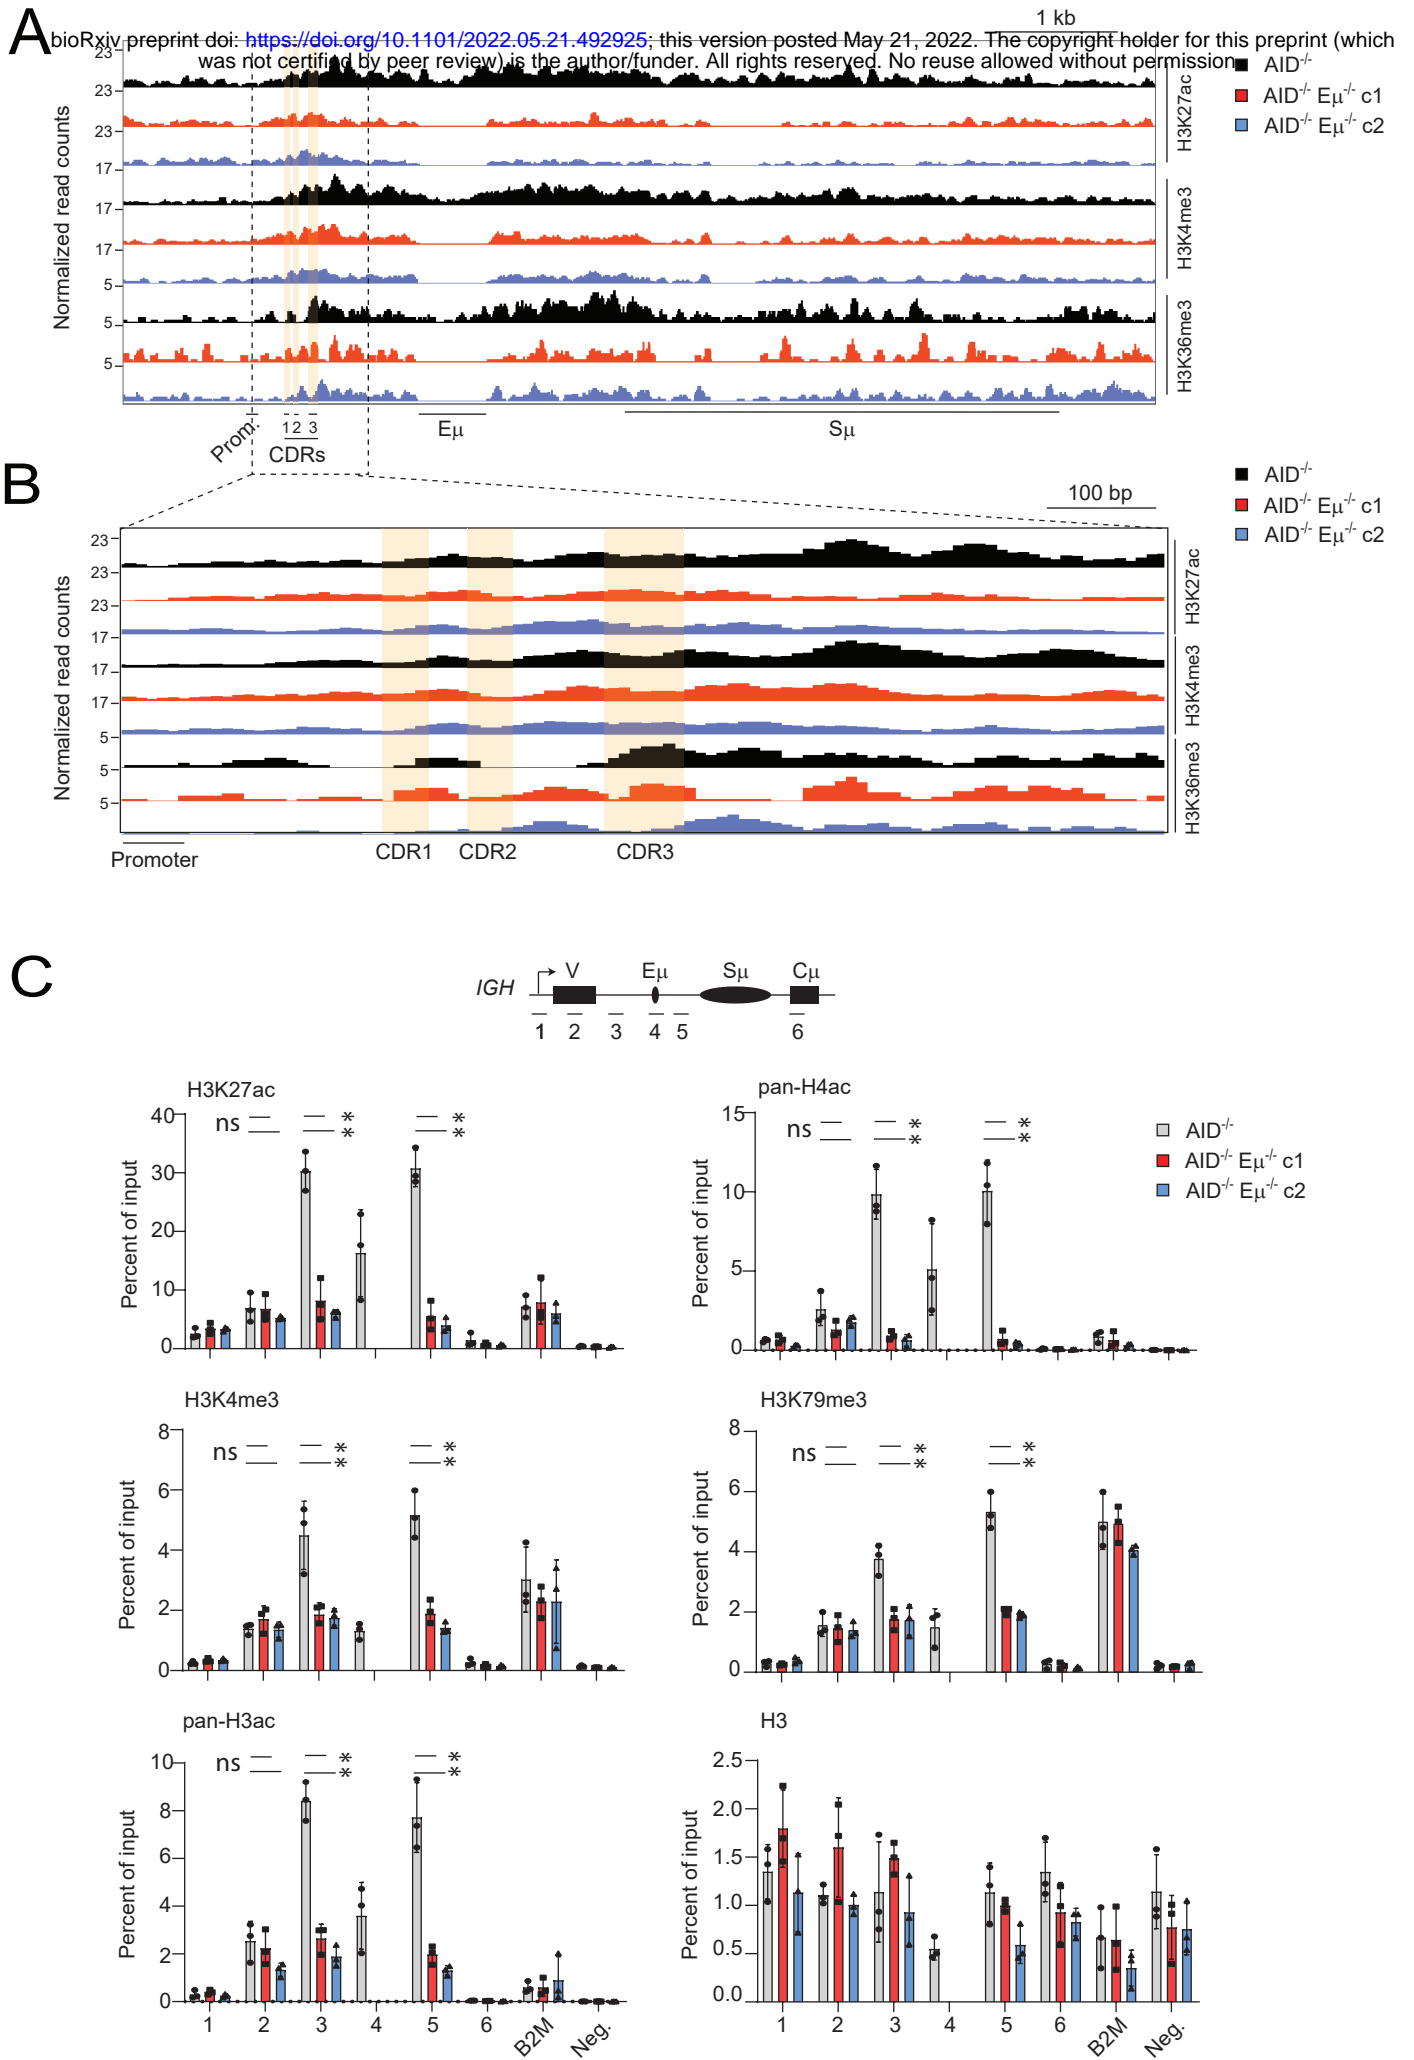

# Figure 2

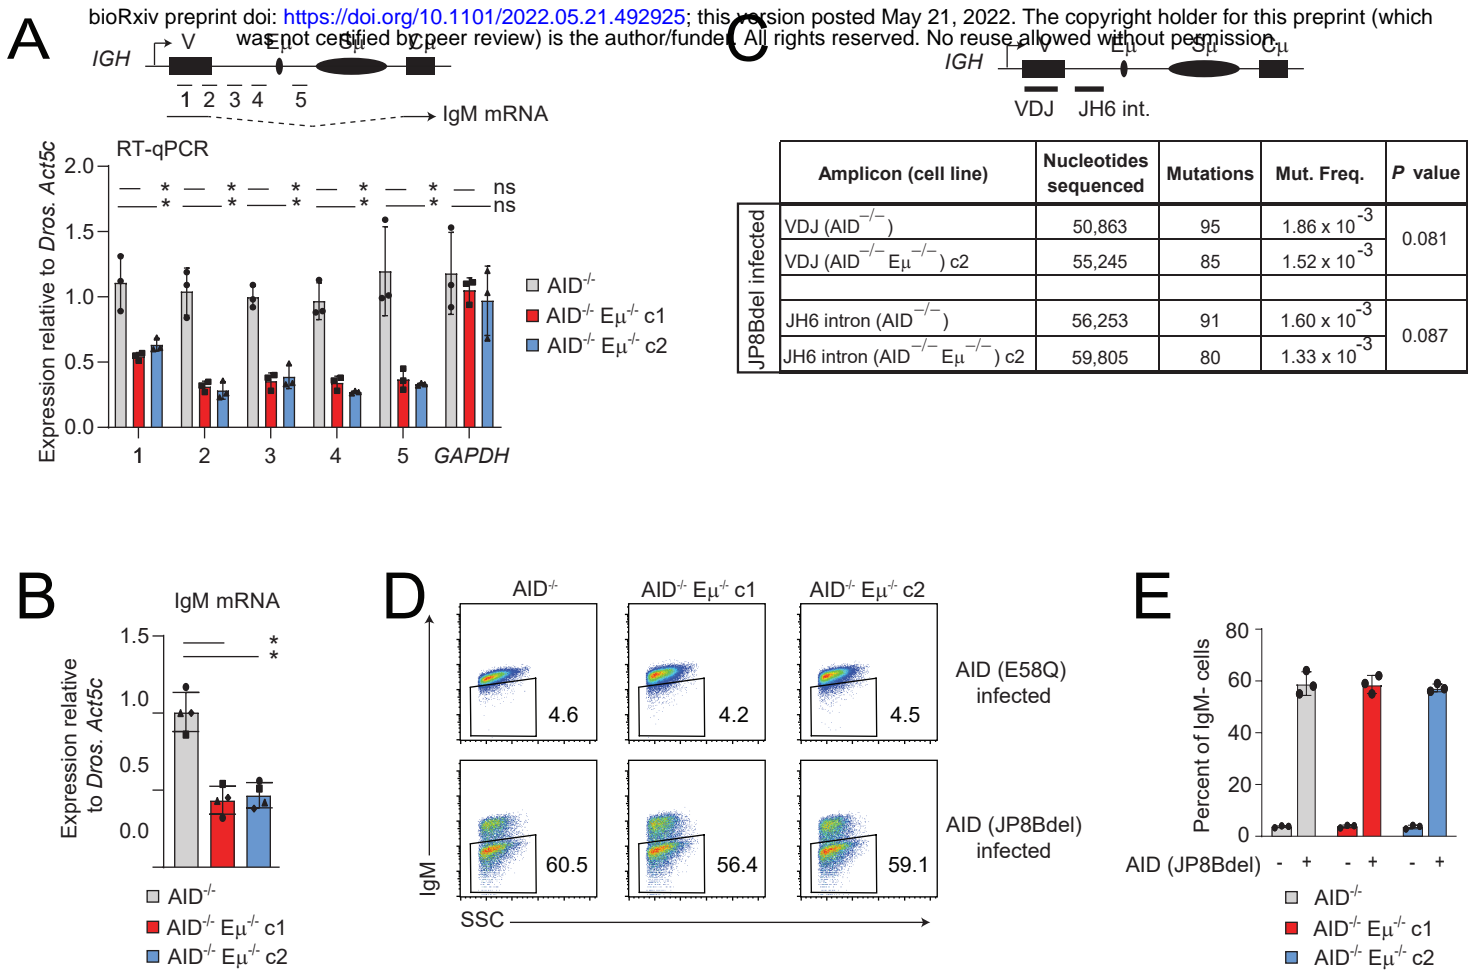

# Figure 3

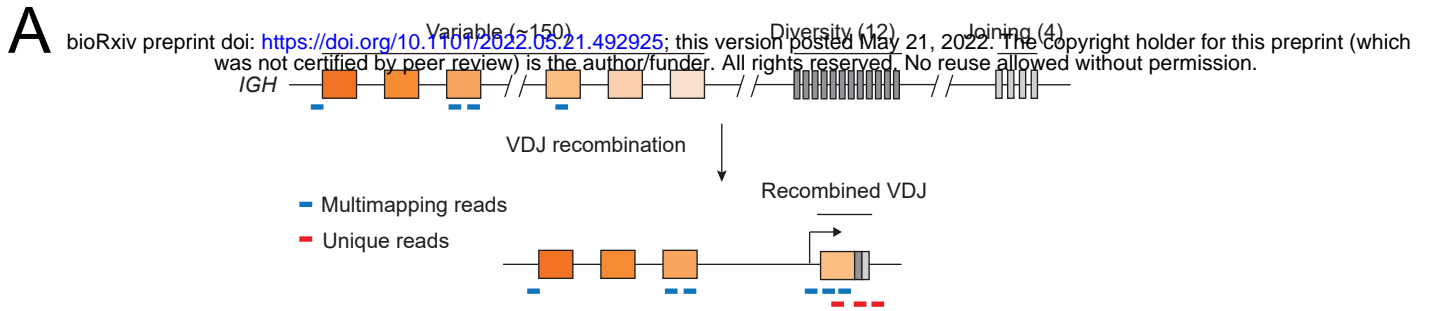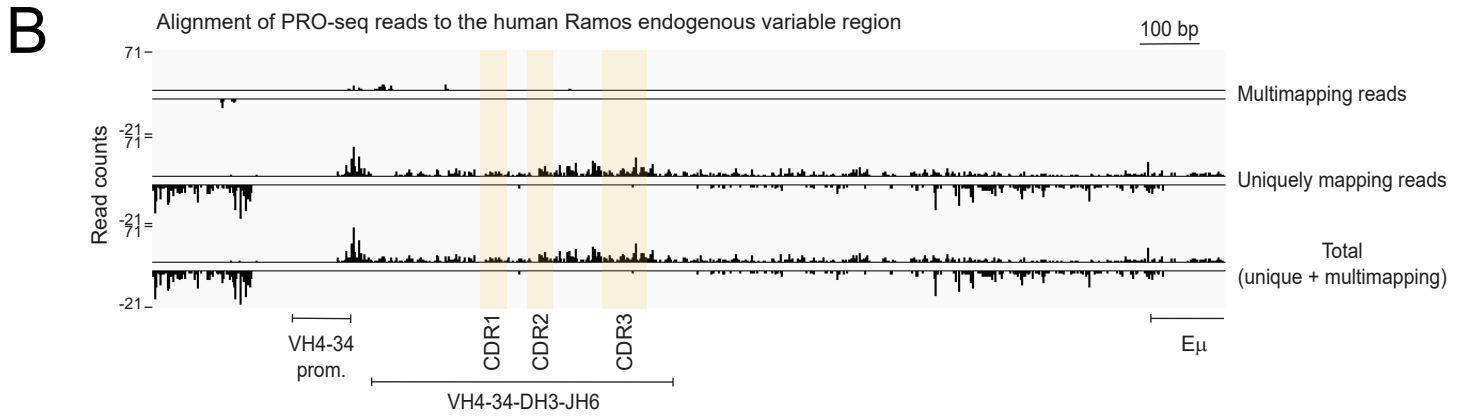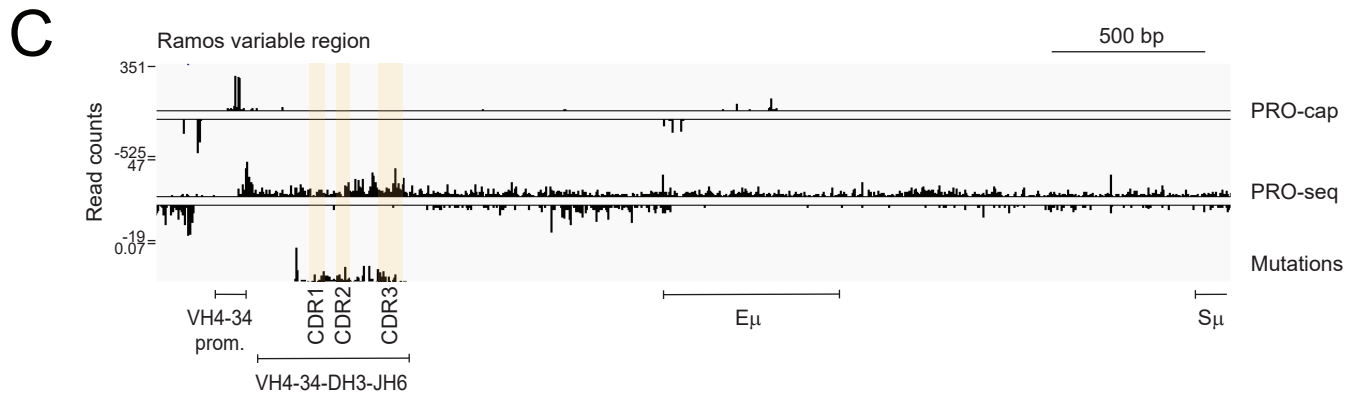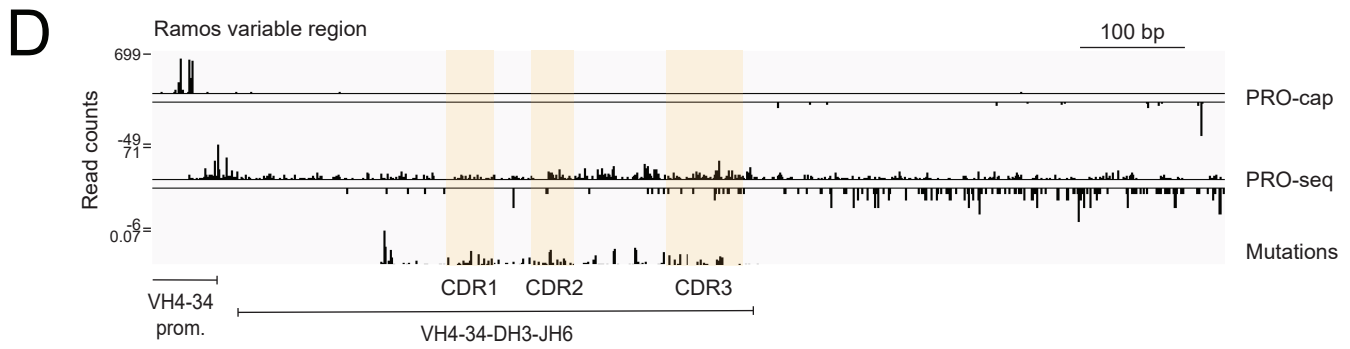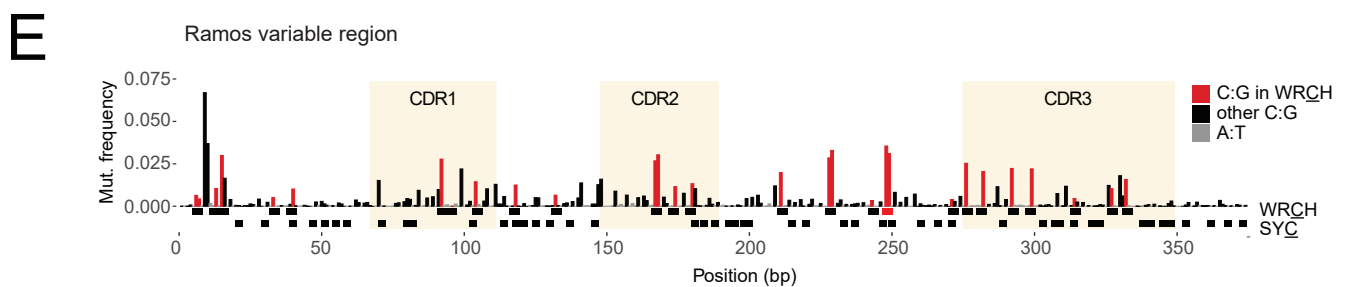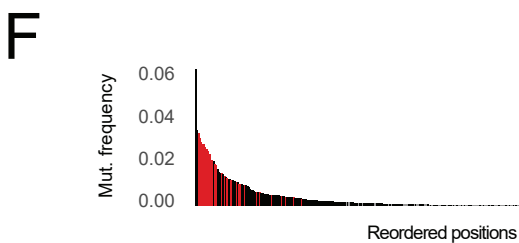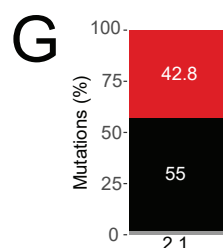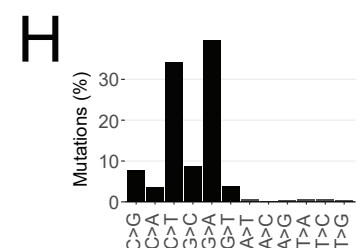

# Figure 4

**A**

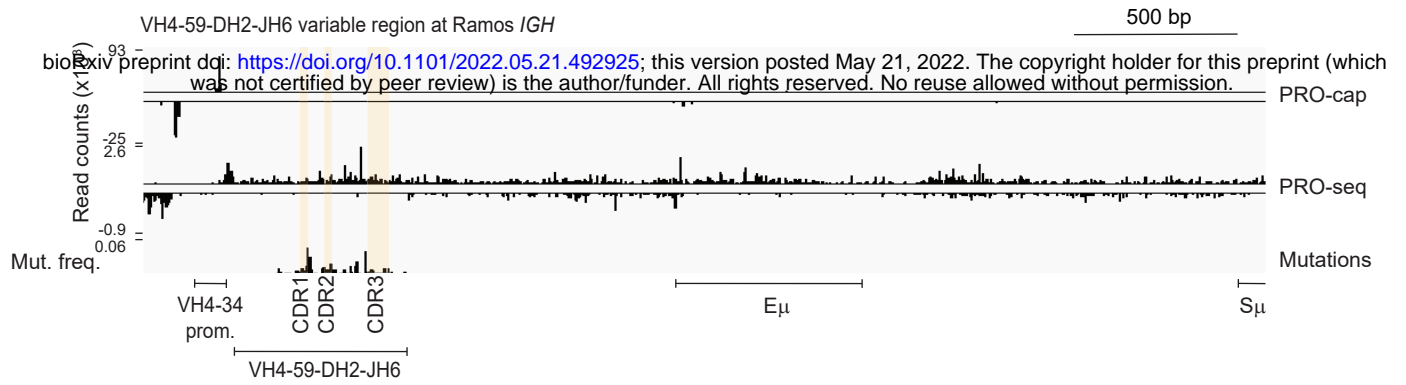

**B**

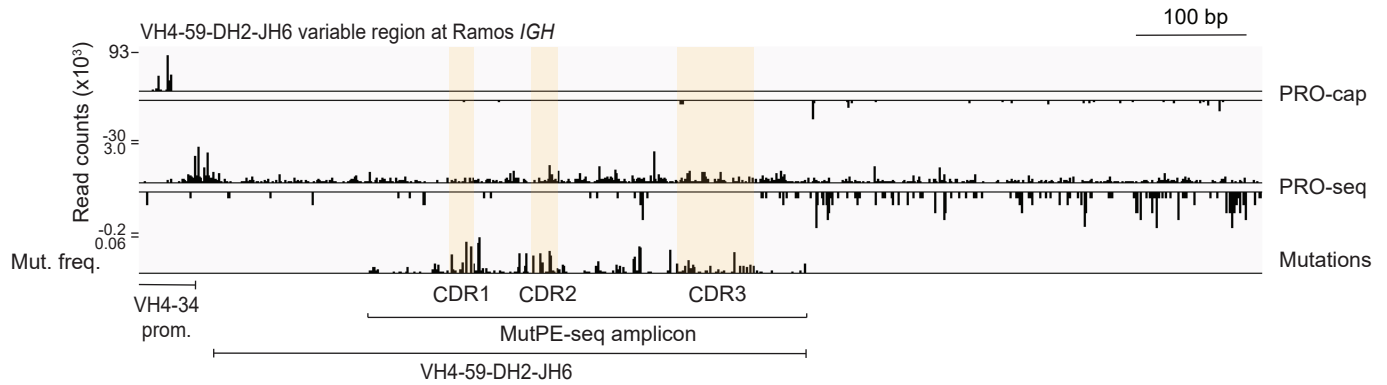

**C**

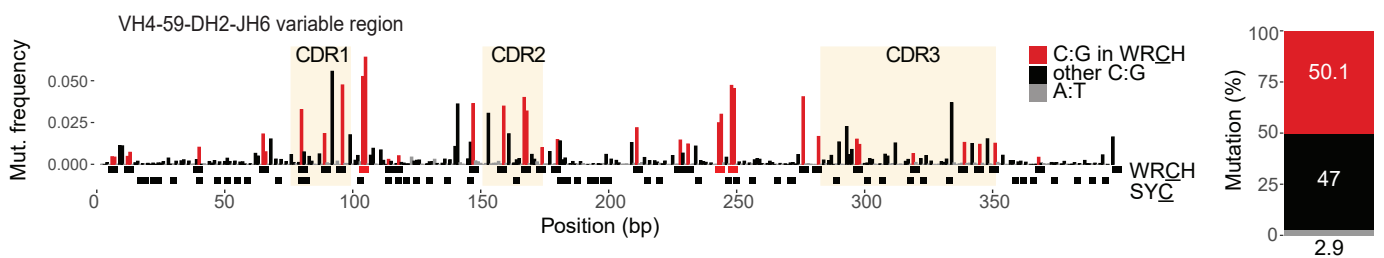

**D**

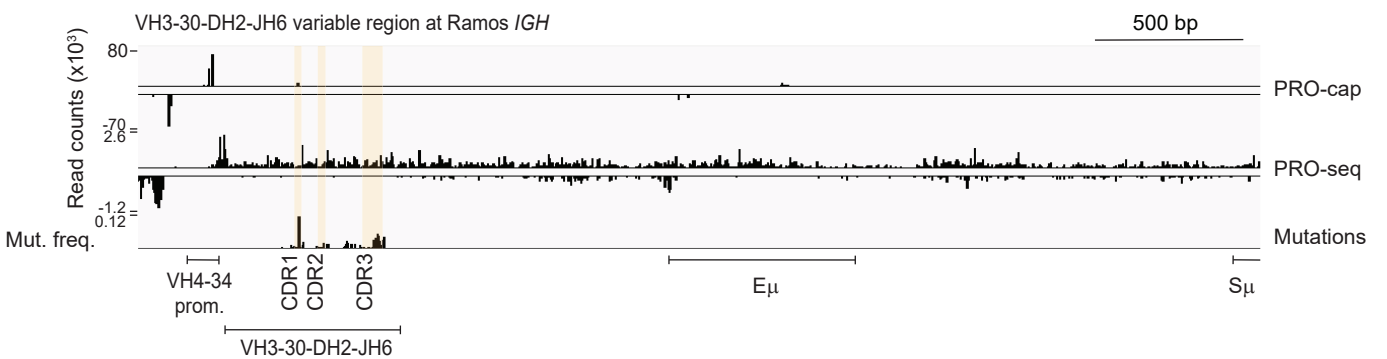

**E**

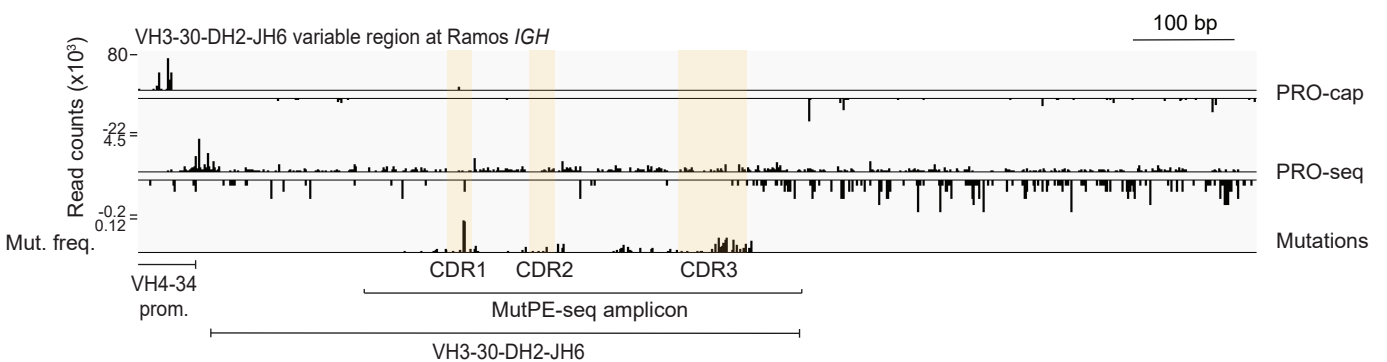

**F**

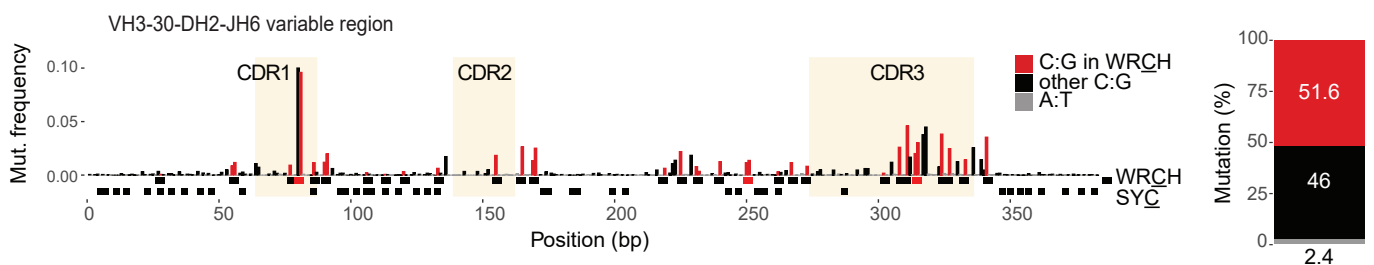

# Figure 5

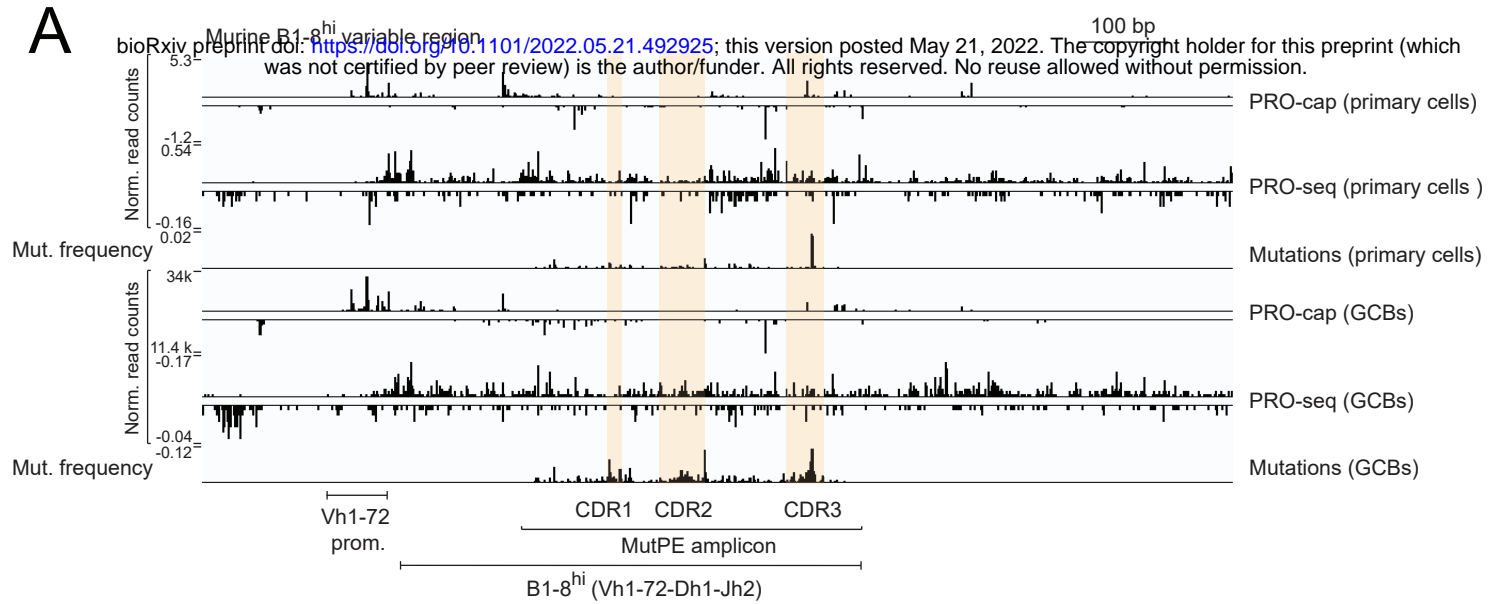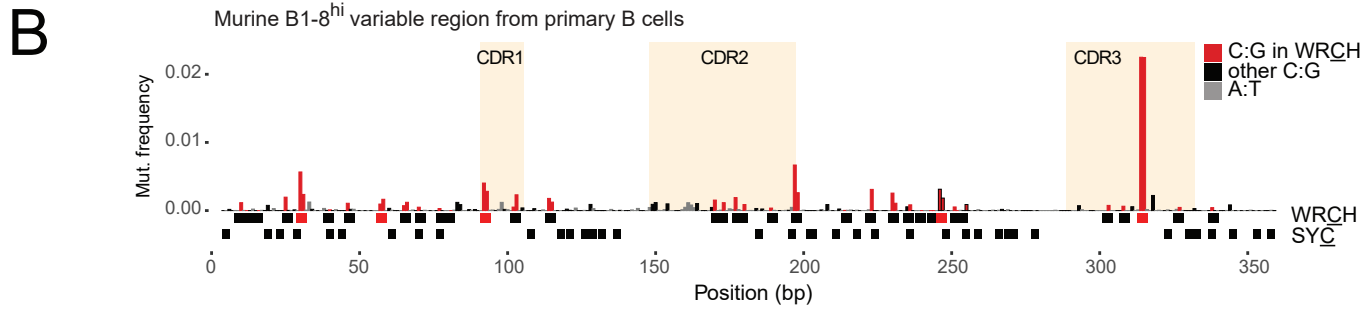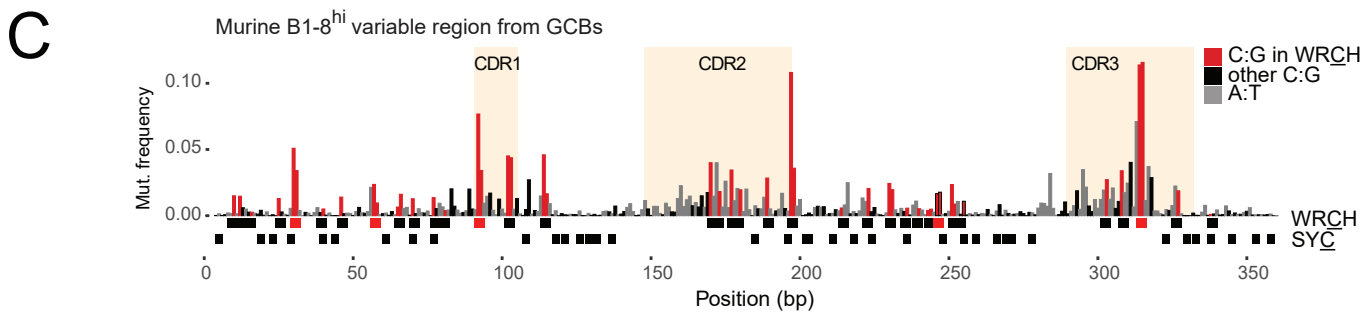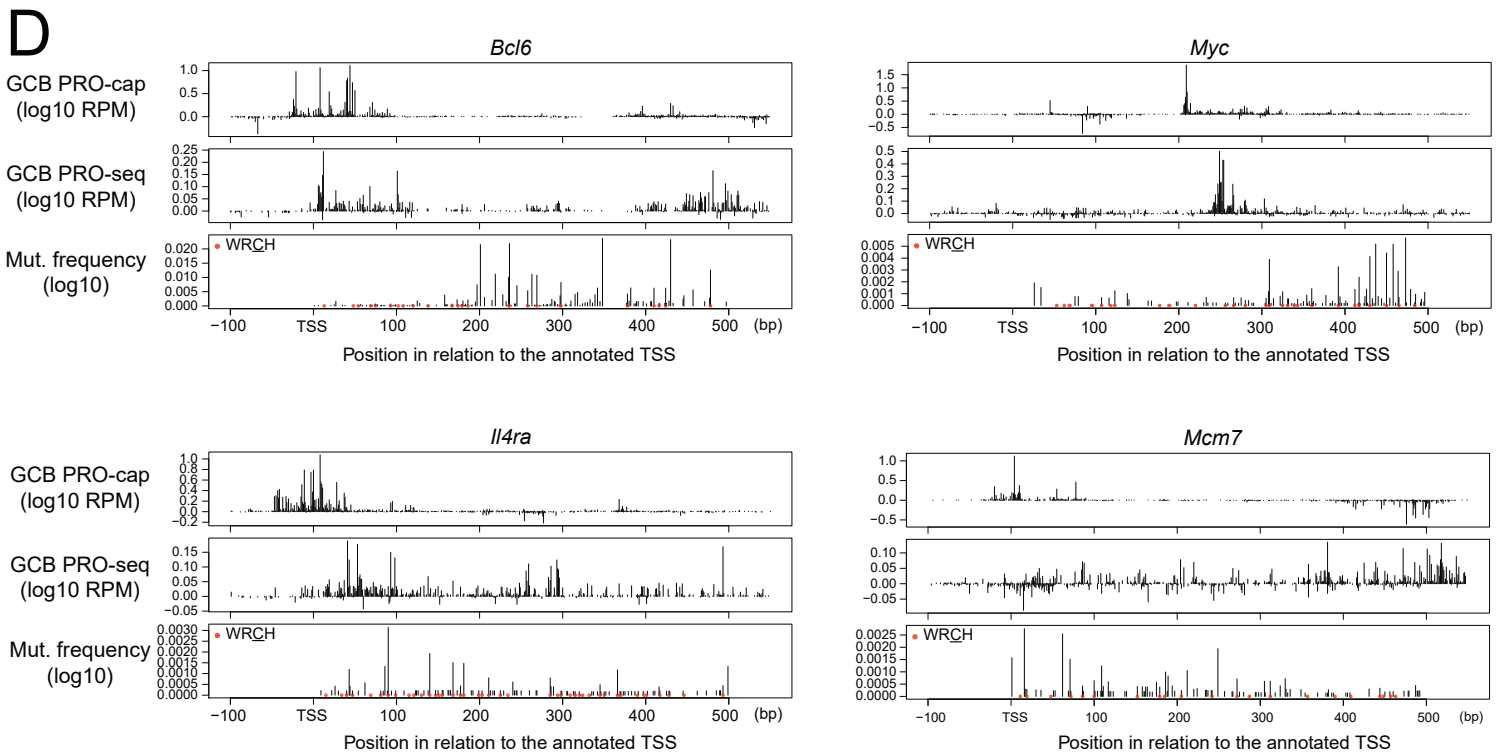

# Figure 6

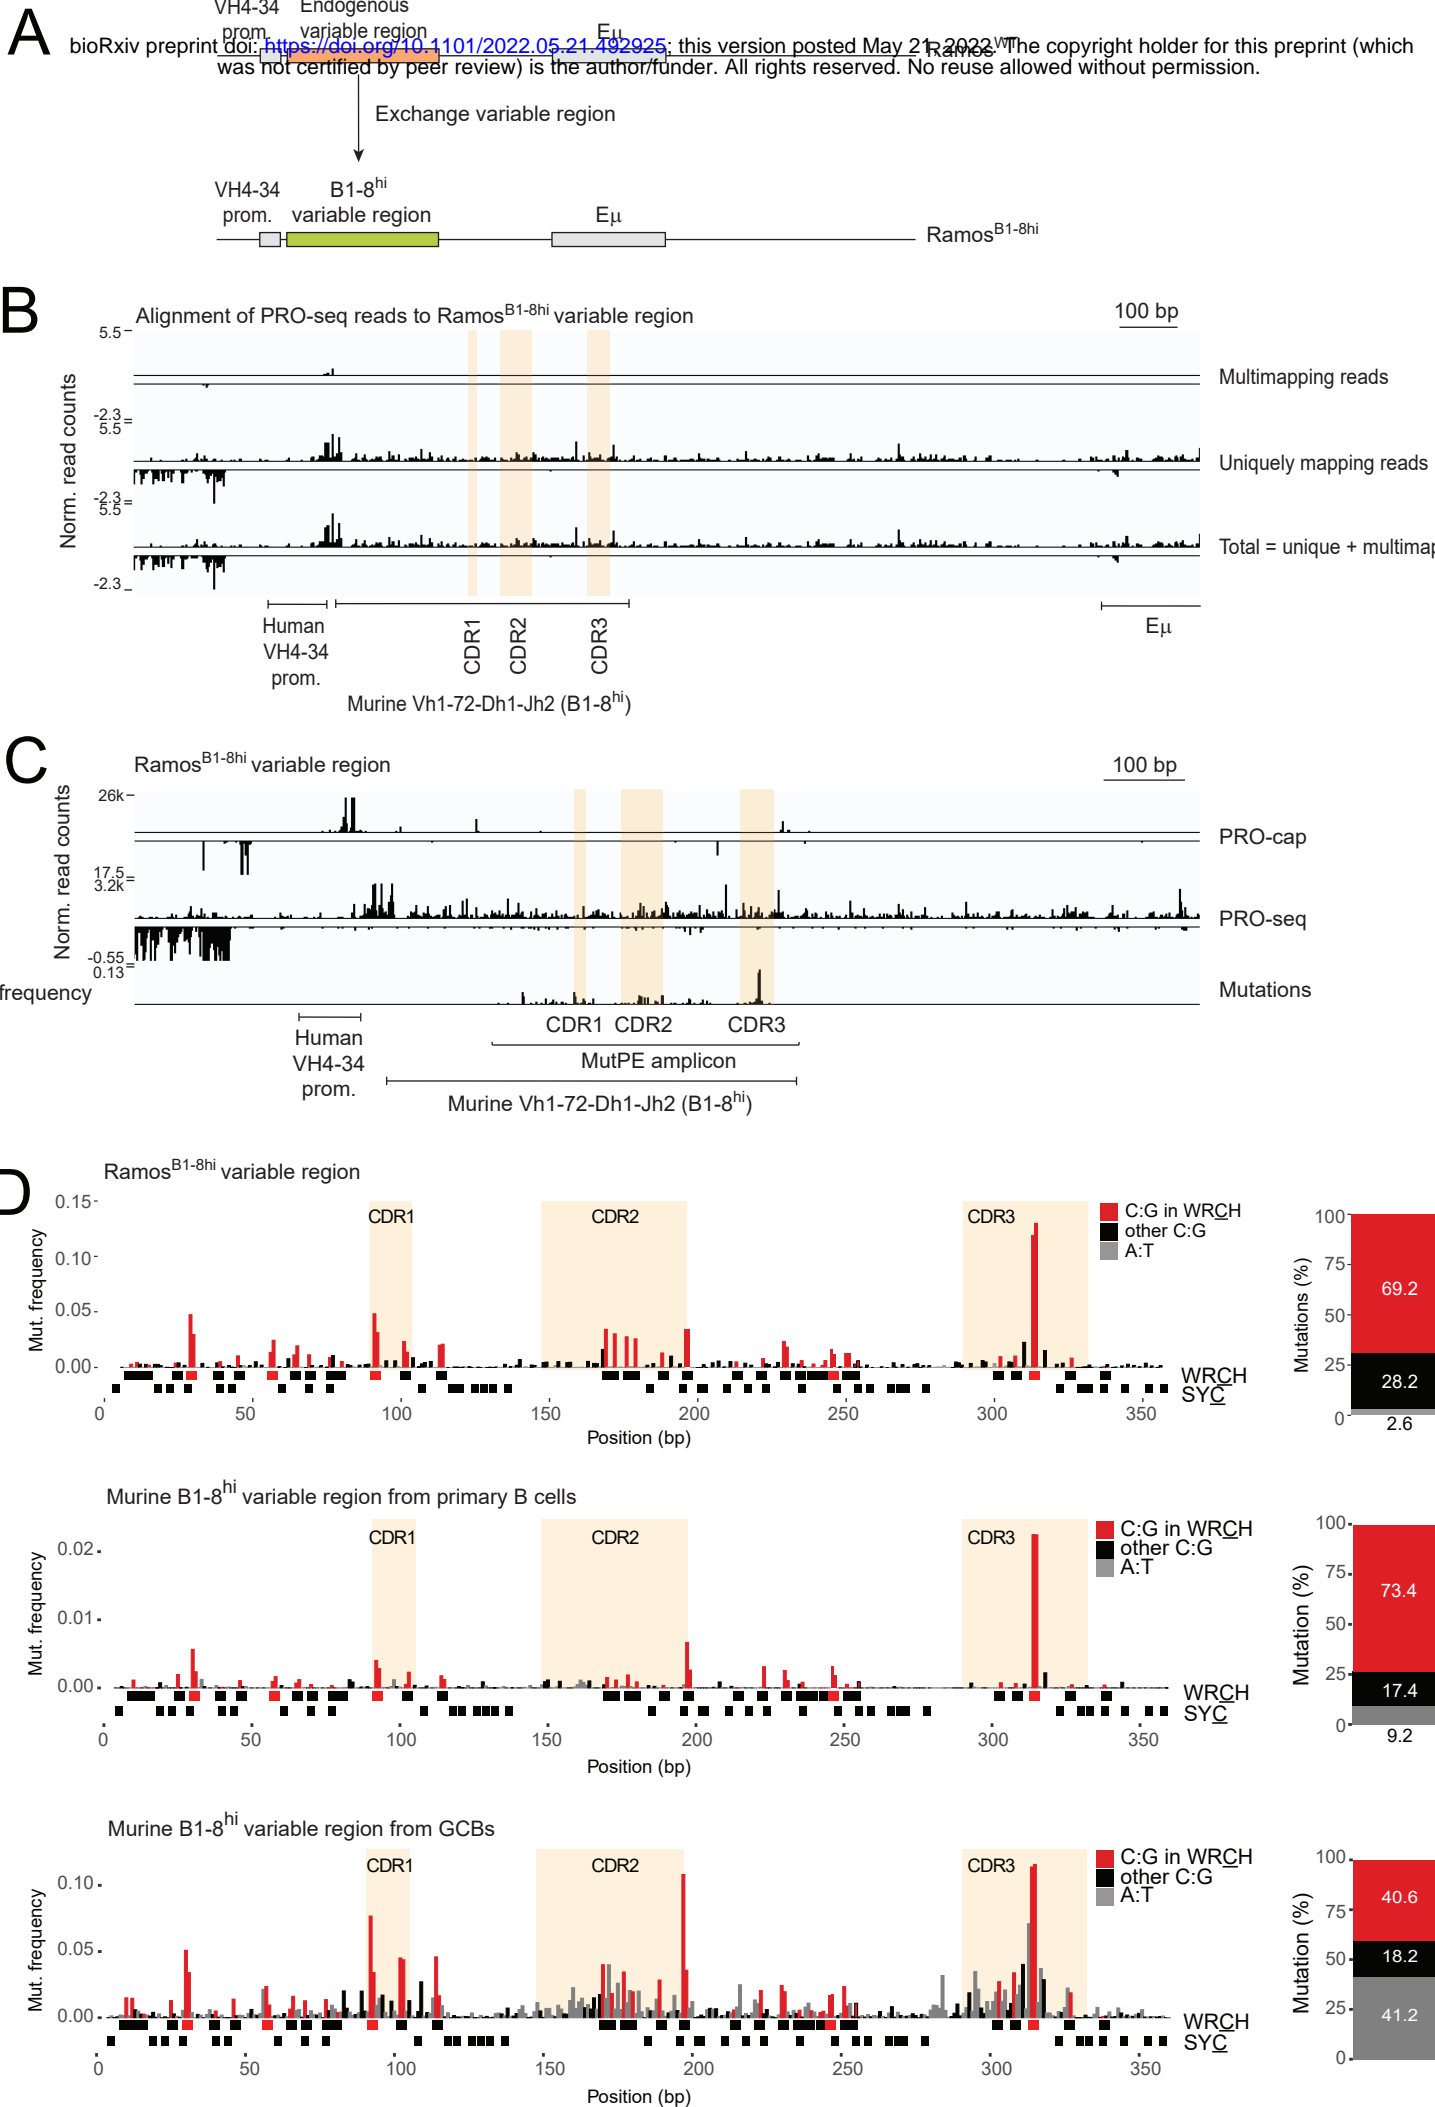

Fig. 7

A

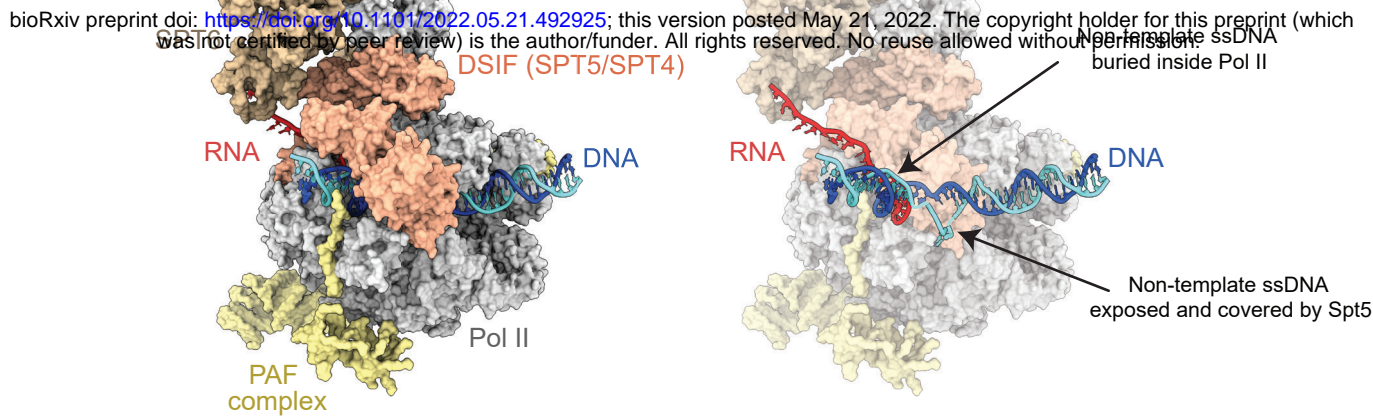

B

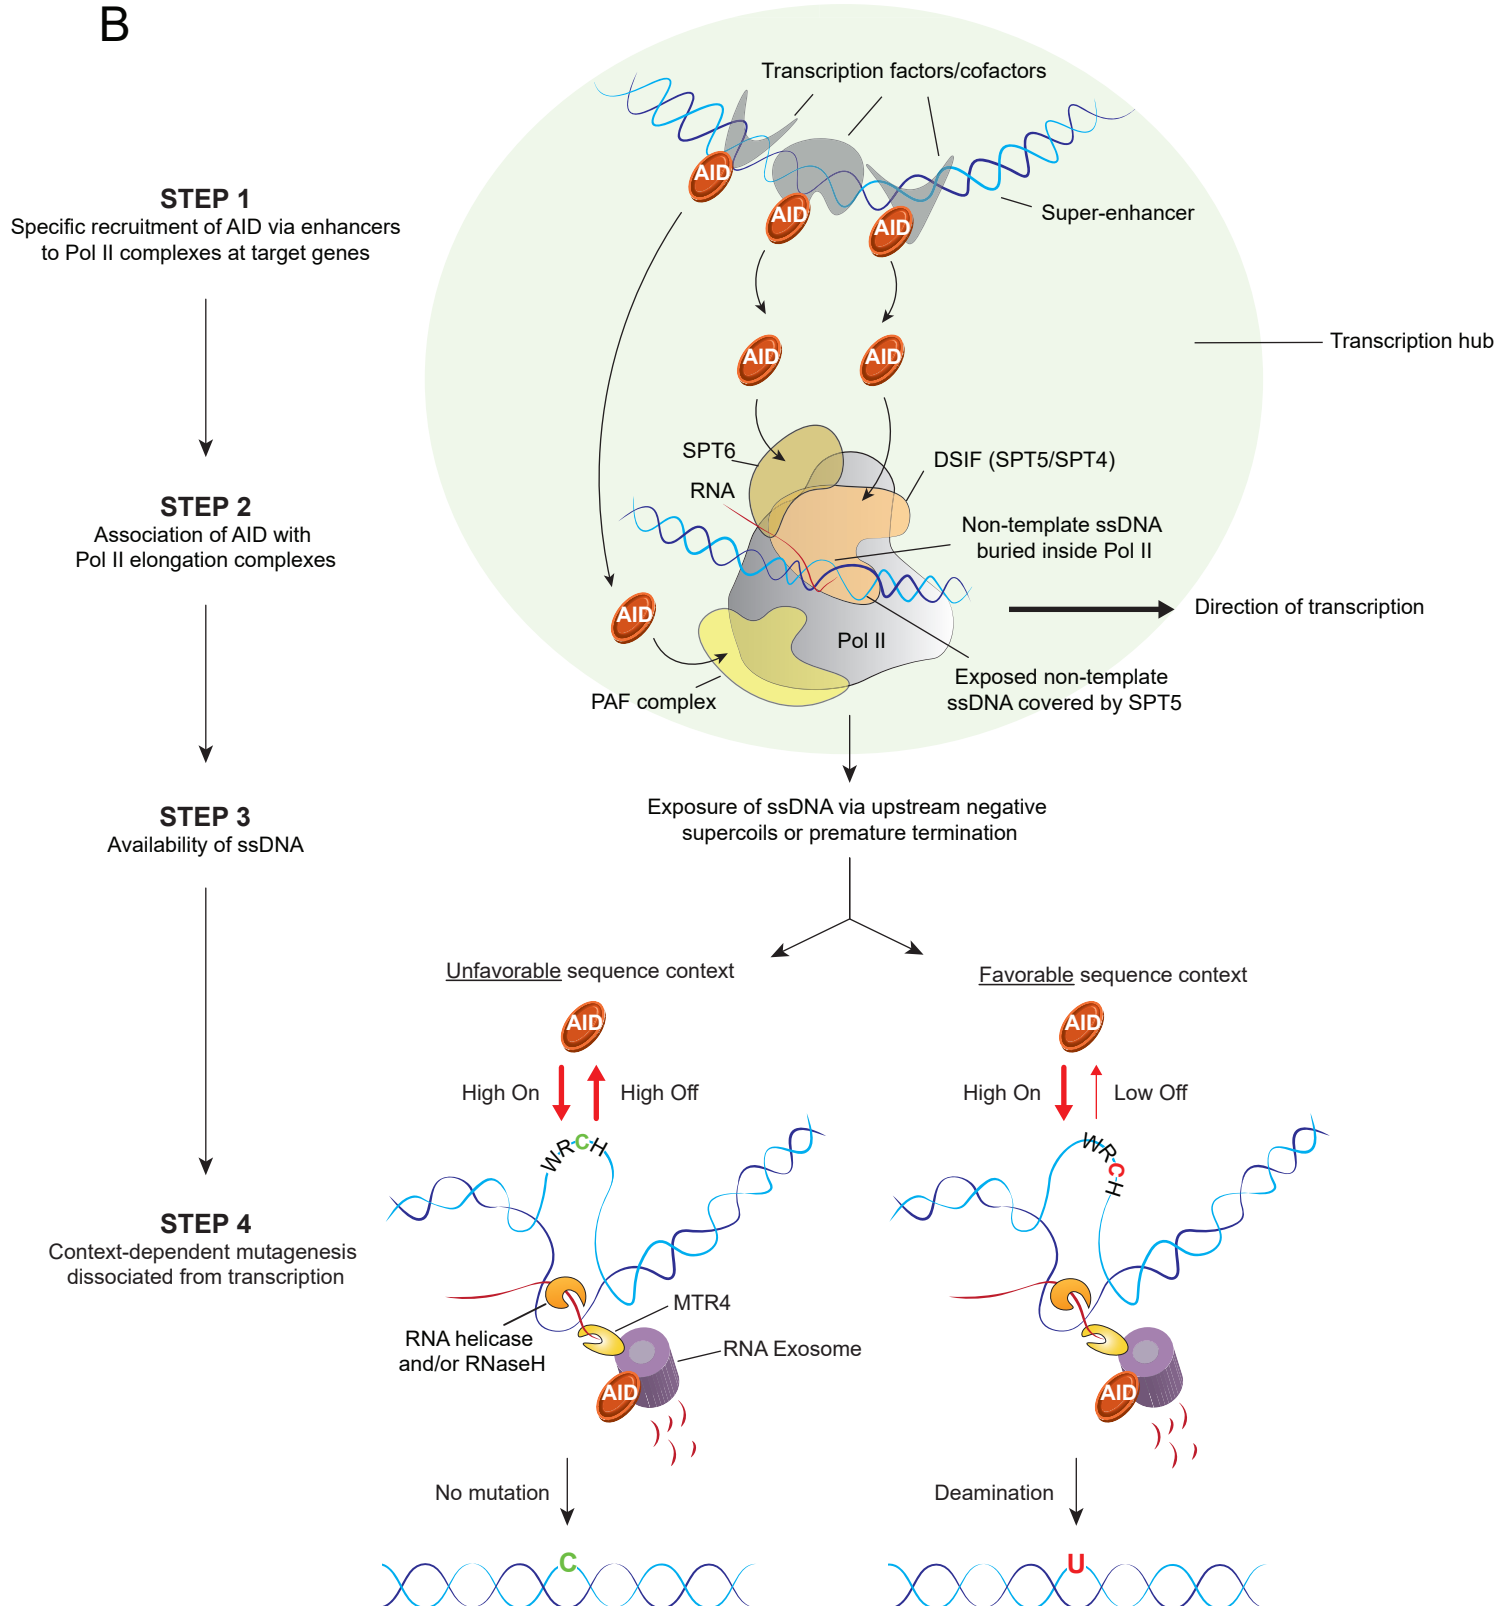



# Figure S1

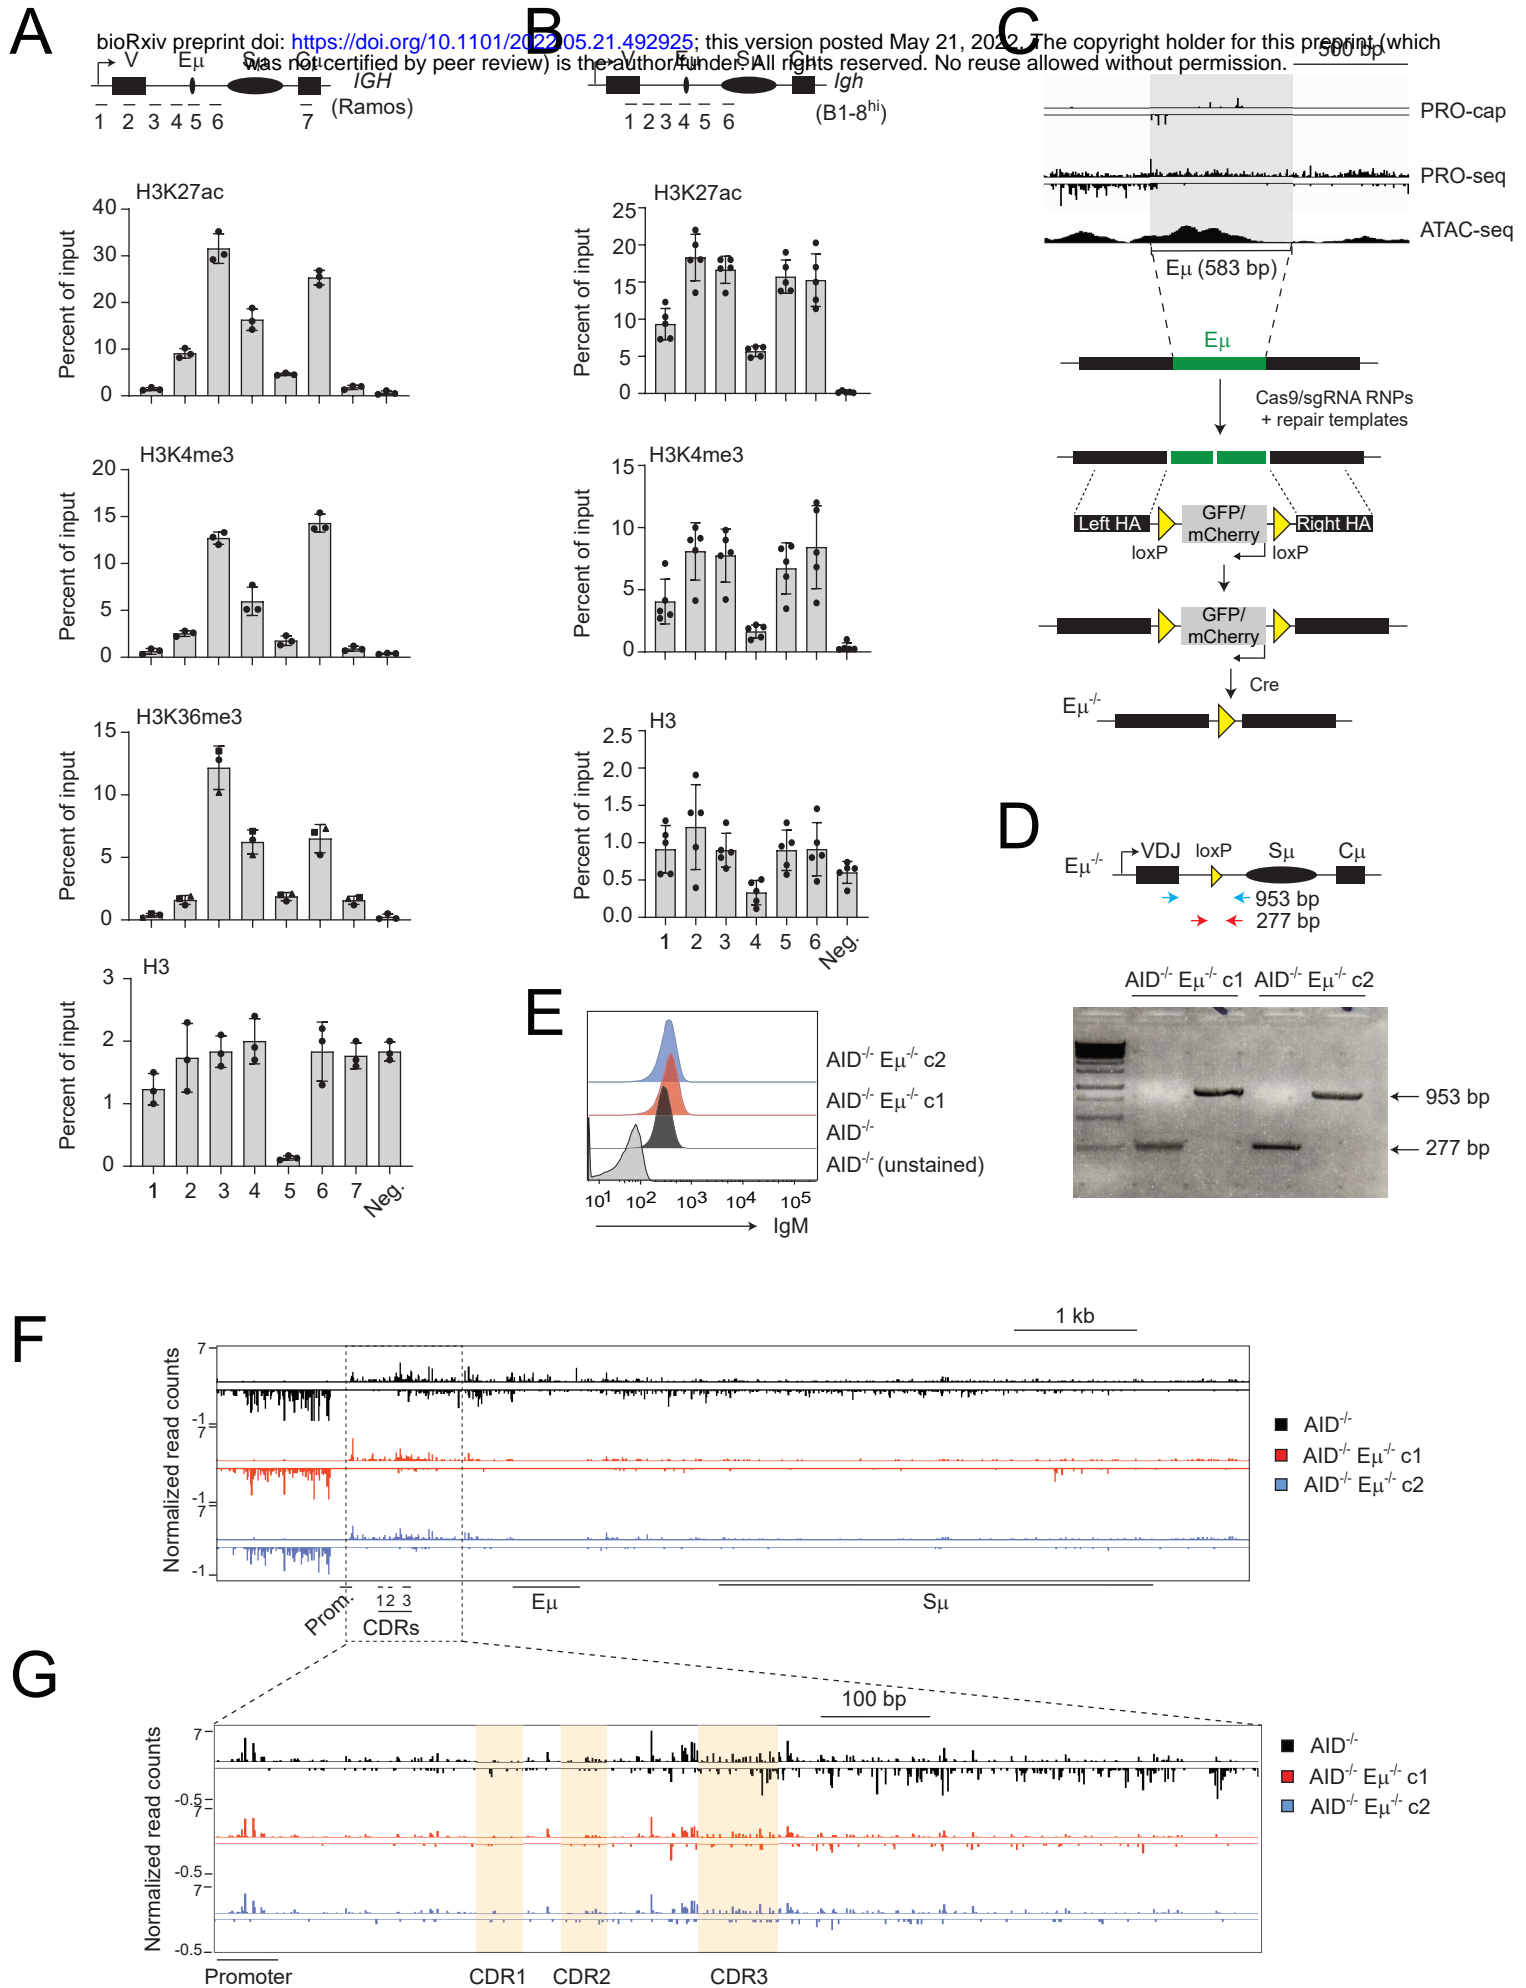

# Figure S2

**A**

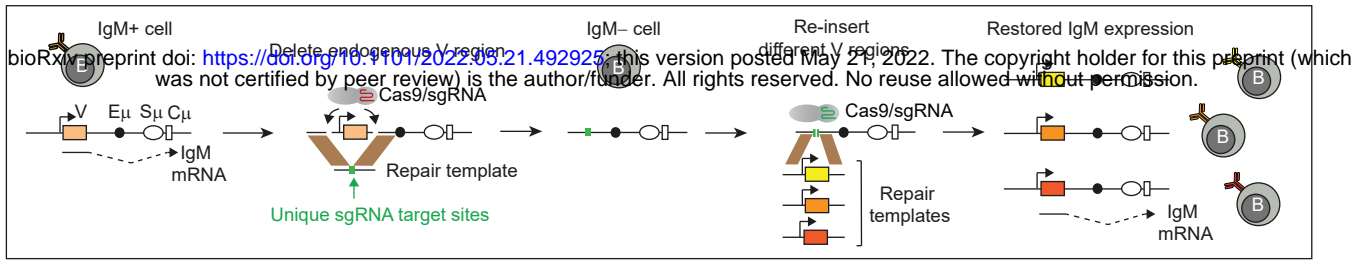

**B**

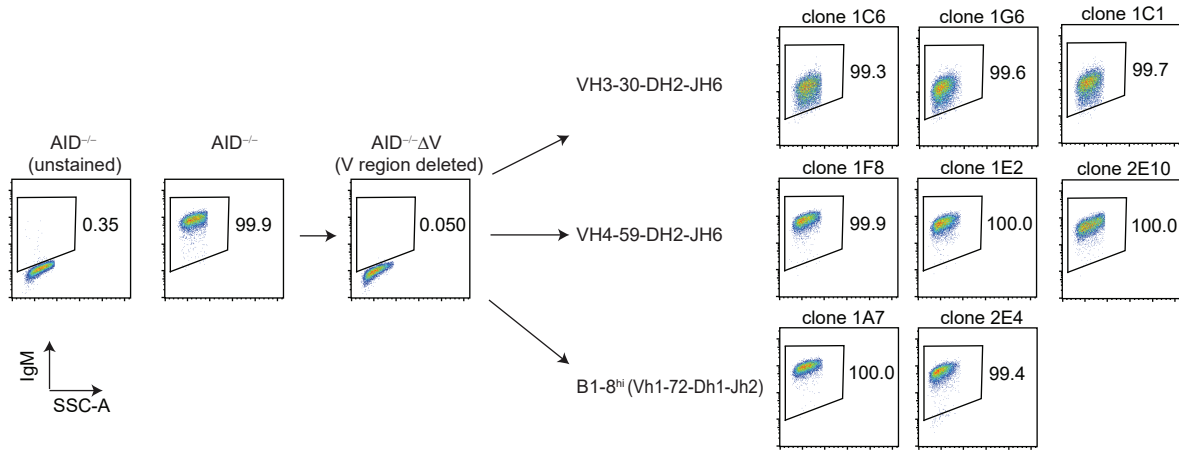

**C**

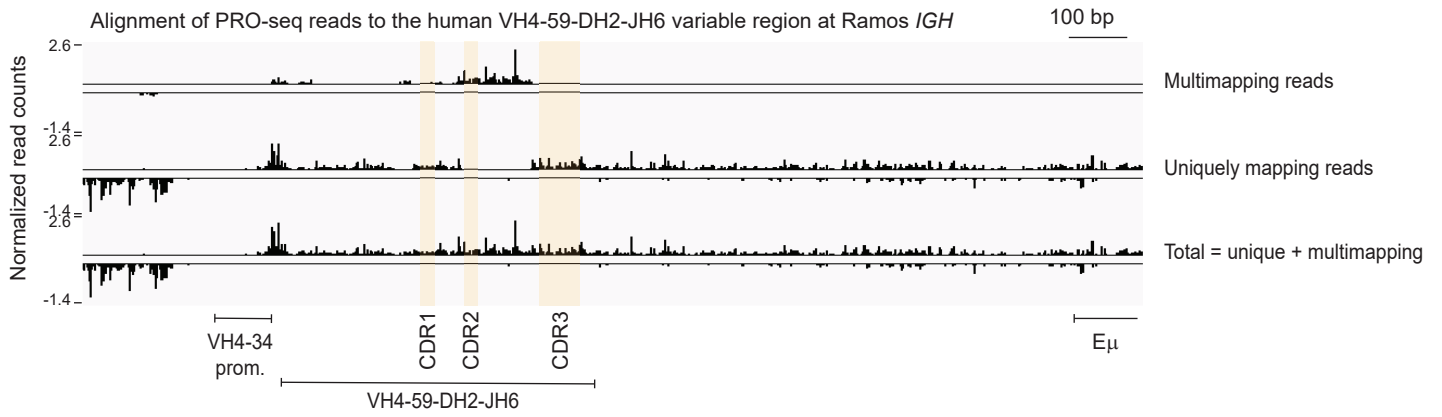

**D**

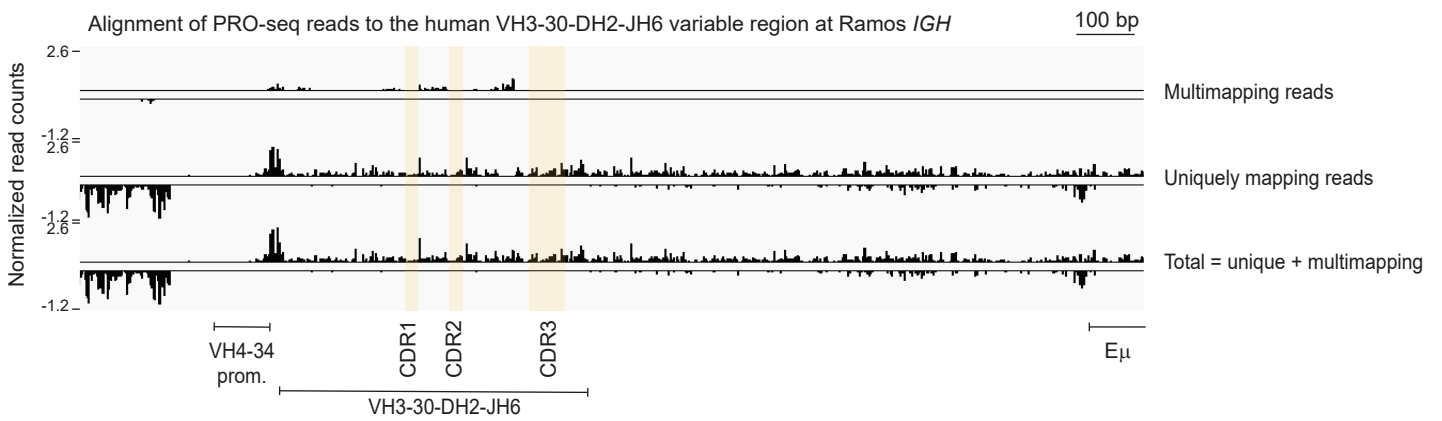

**E**

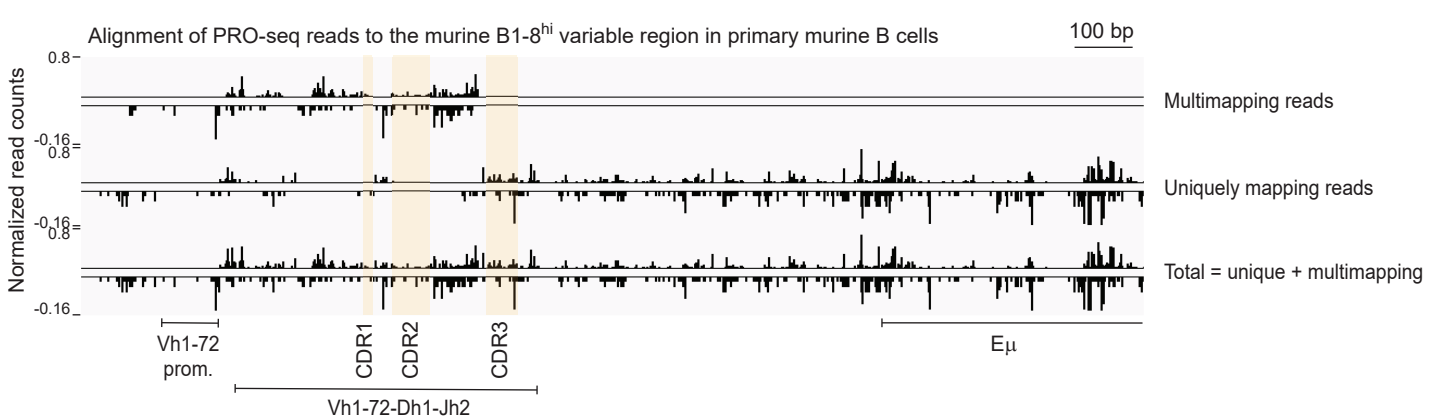

# Fig. S3

## A

Highly mutated residues within 150 bp of the transcription initiation site (defined by PRO-cap)  
 bioRxiv preprint doi: <https://doi.org/10.1101/2022.05.21.492925>; this version posted May 21, 2022. The copyright holder for this preprint (which was not certified by peer review) is the author/funder. All rights reserved. No reuse allowed without permission.

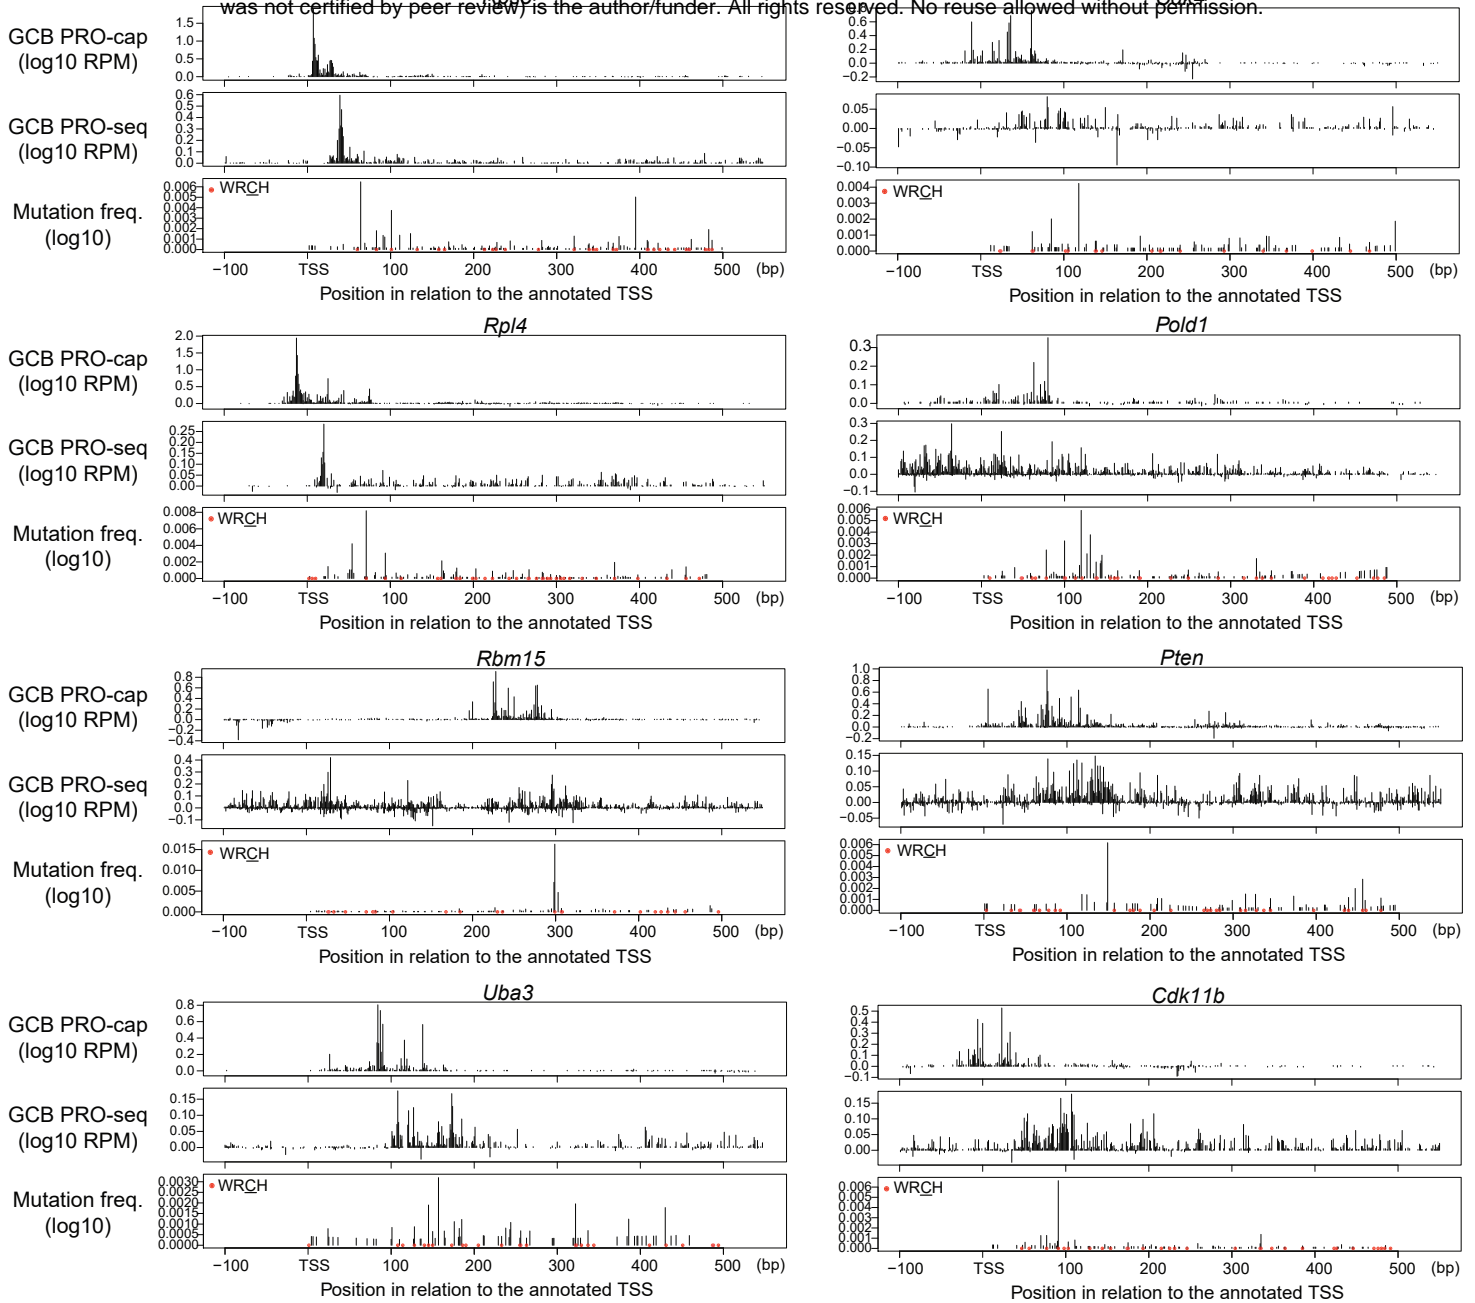

## B

Highly mutated residues near the transcription initiation site (defined by PRO-cap)

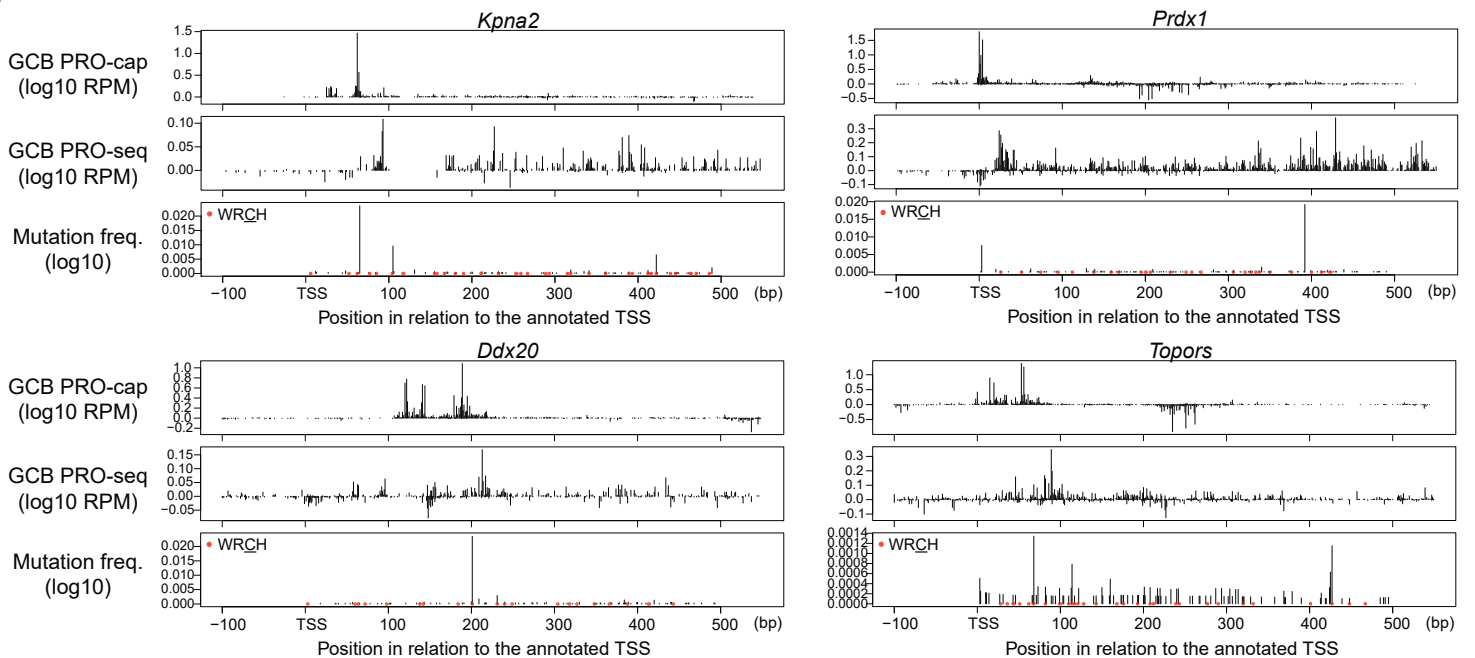

# Fig. S4

bioRxiv preprint doi: <https://doi.org/10.1101/2021.05.21.492925>; this version posted May 21, 2022. The copyright holder for this preprint (which was not certified by peer review) is the author/funder. All rights reserved. No reuse allowed without permission.

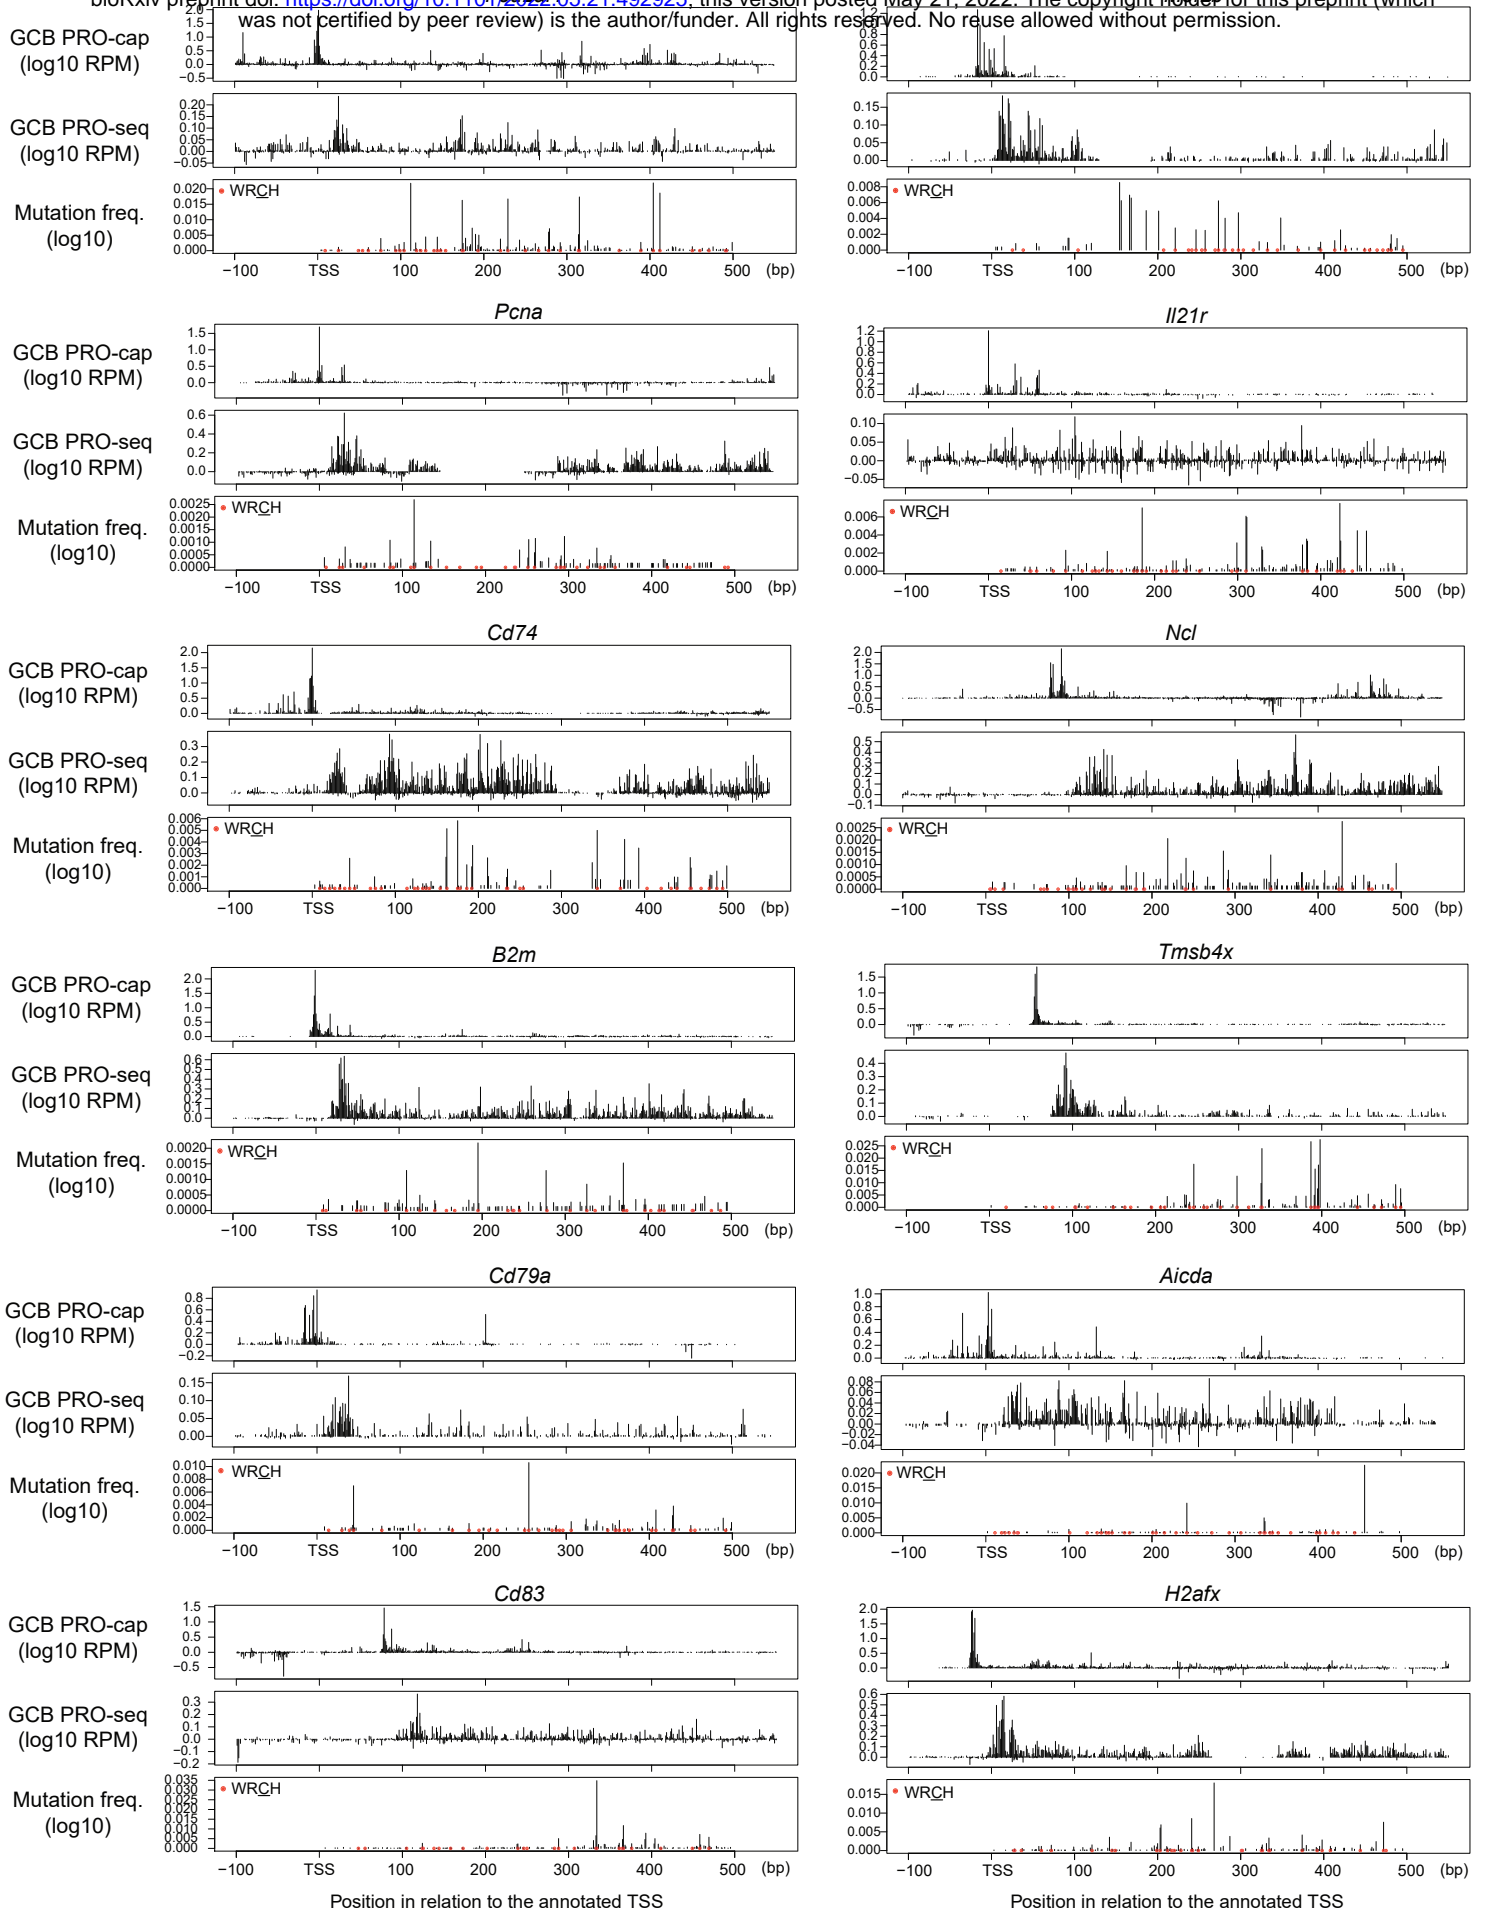

**Table S1: List of primers, oligos and sgRNAs**

**sgRNAs for generating Ramos E $\mu$ <sup>-/-</sup> cells**

|                 |                       |
|-----------------|-----------------------|
| sgRNA_E $\mu$ 1 | CAGTGCTGTCGGCCCCGATG  |
| sgRNA_E $\mu$ 2 | ACTGTGTTCAACAATCTTTTT |
| sgRNA_E $\mu$ 3 | GAGGCTGACCGAAACTGAAA  |

**Genotyping primers for Ramos E $\mu$ <sup>-/-</sup> cells**

|                  | Forward                | Reverse                   | Product sizes         |
|------------------|------------------------|---------------------------|-----------------------|
| gt_E $\mu$ 9+10  | ATGTGTCTGGAATTGAGGCCAA | TTTCTTATGCCACCAACTAACA    | 825 bp WT, 277 bp KO  |
| gt_E $\mu$ 11+12 | ACAGACGGGAGGTACGGTAT   | CCTTAATCACAAAGAGAAAACGAGT | 1501 bp WT, 953 bp KO |

**sgRNAs for generating Ramos variable region knock-in lines**

|                    |                      | Reference                |
|--------------------|----------------------|--------------------------|
| sgRNA-Ramos VDJ 5' | CCTTCAGCACATTTCTACC  | Voss et al., eLife, 2019 |
| sgRNA-Ramos VDJ 3' | TCCTCGGGCATGTTCCGAG  | Voss et al., eLife, 2019 |
| sgRNA-GFP          | GAGCTGGACGGCGACGTAAA | This study               |

**RT-qPCR primers (Ramos)**

|                            | Forward                | Reverse                |
|----------------------------|------------------------|------------------------|
| 1. Variable region         | CAAGAACATGAAACACCTGTGG | ATCCGCATTCTGAGACTC     |
| 2. JH6-intron junction     | GAGGTACGGTATGGACGTCTG  | AGGACCAACCTGCAATGCTC   |
| 3. Intron (5' of E $\mu$ ) | GGAGCCACATTTGGACGAGA   | ACACACAGCGCACCTCATAA   |
| 4. Intron (5' of E $\mu$ ) | ATGCGGGACTGCGTTTTGA    | CATCATCTGCTCCAGCTTCG   |
| 5. Intron (3' of E $\mu$ ) | GCGCCCGACATGGTAAGAGA   | GACCCAGACAATGGTCACTCAA |
| IgM mRNA                   | ACAGACGGGAGGTACGGTAT   | CGACGGGAATTCTCACAGG    |

**ChIP-qPCR primers (Ramos)**

|                                       | Forward                  | Reverse                |
|---------------------------------------|--------------------------|------------------------|
| 1. Promoter                           | CACAGCCAGCATACACCTCC     | CCTGTGGGTGCCTAAGTGAG   |
| 2. Variable region                    | AGGAATGCGGATATGAAGATATGA | CACTGAAGGACCCACCATAGAC |
| 3. Intron (5' of E $\mu$ )            | GGAGCCACATTTGGACGAGA     | ACACACAGCGCACCTCATAA   |
| 4. Intron (5' of E $\mu$ )            | ATGCGGGACTGCGTTTTGA      | CATCATCTGCTCCAGCTTCG   |
| 5. E $\mu$                            | GGTCACCGCGAGAGTCTATTT    | TTCGGTCAGCCTCGCCTTAT   |
| 6. Intron (3' of E $\mu$ )            | GCGCCCGACATGGTAAGAGA     | GACCCAGACAATGGTCACTCAA |
| 7. C $\mu$                            | CGGTACTTCGCCACAGCA       | ACTTGTCCAGGTCTCTCGGTGA |
| <b>B2M</b>                            | CTGTGCTCGCGCTACTCTC      | AACTTGAGAGGGAAGTCAACG  |
| Neg. (negative control region, chr 1) | GGAAAGGCCCCAGAGTTCAA     | CCTCCTGATGTGAAGGCC     |

**ChIP-qPCR primers (B1-8<sup>hi</sup>)**

|                        | Forward                           | Reverse                              |
|------------------------|-----------------------------------|--------------------------------------|
| 1. Jh4-intron junction | TGGACGAGGCCTTGAGTGG               | AGACTGTGAGAGTGGTGC                   |
| 2. Intron              | CAGTCTCCTCAGGTGAGTCTC             | CCCAATGACCCCTTCTGACT                 |
| 3. Intron              | ATGGTGTGGTGGAGTCC                 | AATCTCCAACACAGCCC                    |
| 4. E $\mu$             | TGGGGCACTTTCTTAGATTTG             | GACAGCACTACCCTTTTGAGACC              |
| 5. Intron              | CTGCAGCAGCTGGCAGG                 | GGCTGGACAGAGTGTTCAAAACCCAC           |
| 6. Intron              | GTTGCCTGTTAACCAATAATCATAGACTCATGG | GTATAACTGAAGTAGAGACAGCATCAGTACCTCAAC |

**ChIP antibodies**

|           | Vendor       | Catalog no. |
|-----------|--------------|-------------|
| H3K4me3   | Abcam        | ab8580      |
| H3K27ac   | Abcam        | ab4729      |
| H3K36me3  | Abcam        | ab9050      |
| H3 pan-Ac | Active Motif | 61937       |
| H4 pan-Ac | Active Motif | 39026       |
| H3K79me3  | Abcam        | ab2621      |
| H3        | Abcam        | ab1791      |
| IgG       | Invitrogen   | 10500C      |

**FACS antibody**

|                  | Vendor         | Catalog no. | Dilution |
|------------------|----------------|-------------|----------|
| IgM-APC (MHM-88) | BioLegend      | 314510      | 1/200    |
| B220-FITC        | BD Biosciences | 553088      | 1/500    |
| Fas-PE-Cy7       | BD Biosciences | 557653      | 1/1000   |
| CD38-APC         | ThermoFisher   | 17-0389-42  | 1/200    |

bioRxiv preprint doi: <https://doi.org/10.1101/2022.05.21.492925>; this version posted May 21, 2022. The copyright holder for this preprint (which was not certified by peer review) is the author/funder. All rights reserved. No reuse allowed without permission.

**MutPE-seq primers**

|                                      |                                                         |                                                                      |
|--------------------------------------|---------------------------------------------------------|----------------------------------------------------------------------|
| Round 1_FWD (B1-8hi)                 | CTCTTTCCCTACACGACGCTCTCCGATCTNNNNNTCCACAGGTGTCCACTCCCAG | N is A,G,C,T randomly entered during primer synthesis                |
| Round 1_FWD (VH4-34, VH4-59, VH3-30) | CTCTTTCCCTACACGACGCTCTCCGATCTNNNNNTGTTACAGGGGTCCTGTCC   | N is A,G,C,T randomly entered during primer synthesis                |
| Round 1_REV                          | CTGGAGTTCAGACGTGTGCTCTCCGATCTCCTAGAGTGGCCATTCTTACC      |                                                                      |
| Round 2_FWD                          | AATGATACGGCGACCACCGAGATCTACACNNNNNNNACACTCTTCCCTACACGAC | N represents 8 positions of individual sample barcode (IdxE501-E5xx) |
| Round 2_REV                          | CAAGCAGAAGACGGCATACGAGATNNNNNNGTGAAGTTCAGACGTGTG        | N represents 6 positions of individual sample barcode (revIDX1-xx)   |
